# Supplementary material for: Construction and validation of a 15-gene ferroptosis signature in lung adenocarcinoma
Source: PeerJ. 2021 Jul 7;9:e11687. doi: 10.7717/peerj.11687 (PMC8272465; doi:10.7717/peerj.11687)
Supplement: Supplemental Information 1 [file peerj-09-11687-s001.xlsx]

## Sheet: Sheet1
	Characterisics	TCGA cohort (N=477)	GSE72094 cohort (N=386)	GSE30219 cohort (N=85)
	Age (median, range)	66 (33-88)	70 (38-89)	61 (44-84)
	Female	257 (53.9%)	218 (56.5%)	19 (22.4%)
	Male	220 (46.1%)	168 (43.5%)	66 (77.6%)
	Stage (%)
	I	253 (53.0%)	246 (63.7%)	NA
	II	113 (23.7%)	65 (16.8%)	NA
	III	78 (16.4%)	56 (14.5%)	NA
	IV	25 (5.2%)	14 (3.6%)	NA
	Unknown	8 (1.7%)	5 (1.3%)	NA
	T stage (%)
	T1	159 (33.3%)	NA	71 (83.5%)
	T2	254 (53.3%)	NA	12 (14.1%)
	T3	43 (9.0%)	NA	2 (2.4%)
	T4	18 (3.8%)	NA	NA
	Unknown	3 (0.6%)	NA
	N stage (%)
	N0	307 (64.3%)	NA	82 (96.5%)
	N1	90 (18.9%)	NA	3 (3.5%)
	N2	67 (14.1%)	NA	NA
	N3	2 (0.4%)	NA	NA
	Unknown	11 (2.3%)	NA	NA
	M stage (%)
	M0	313 (65.6%)	NA	NA
	M1	24 (5.0%)	NA	NA
	Unknown	140 (29.4%)	NA	NA
	OS days (median)	567	821	2361
	NA: not applicable.
