# Supplementary material for: Construction and validation of a 15-gene ferroptosis signature in lung adenocarcinoma
Source: PeerJ. 2021 Jul 7;9:e11687. doi: 10.7717/peerj.11687 (PMC8272465; doi:10.7717/peerj.11687)
Supplement: Supplemental Information 5 [file peerj-09-11687-s005.xlsx]

## Sheet: GSE72094Risk
id	futime	fustat	AGER	CISD1	DPP4	EGLN1	FANCD2	GLS2	ISCU	ITGA6	ITGB4	KRAS	NEDD4	PEBP1	SLC11A2	TFAP2A	VDAC1	riskScore	risk
GSM1854822	3.8411	0	7.49346	10.4804	9.55683	6.95227	5.05022	8.79612	9.97523	9.33942	6.6807	7.55581	6.33021	12.523	8.76809	4.64164	9.21911	2.08881	low
GSM1854995	1.3589	1	6.37587	10.7089	7.85846	7.43271	5.95145	4.32197	9.43681	10.8925	8.29932	8.12816	6.76559	11.4844	7.35066	3.80674	9.42746	4.19265	high
GSM1855228	0.468493	1	10.4994	10.6678	9.30589	6.98302	6.46784	6.32934	9.81828	10.6989	7.43955	8.18806	6.92632	11.5629	8.39781	8.34803	9.33469	3.25018	high
GSM1855113	2.05479	0	9.94691	9.75609	10.2524	6.43171	5.55316	8.80253	9.91424	10.0637	7.00019	6.86109	6.53471	12.2359	7.92688	4.04355	9.08362	1.85859	low
GSM1855144	2.32877	0	9.11293	10.5586	10.2281	7.34569	6.17428	8.05145	10.661	9.73409	7.08159	6.87417	7.41569	12.3564	8.71589	7.17562	9.43101	2.3937	low
GSM1854929	1.87123	0	8.16647	10.2394	9.03847	6.75134	5.59219	6.33746	10.0196	10.846	7.78432	6.77201	6.90745	11.9819	7.87818	6.57772	8.6858	2.81654	high
GSM1855093	2.09863	0	10.2651	10.3112	9.86392	6.5829	6.25699	6.12787	10.1395	10.2216	7.92934	7.19273	6.45524	11.8512	8.30698	5.93367	8.81301	2.70556	low
GSM1855215	4.24932	0	8.6179	10.718	11.2776	7.11972	6.55642	8.80836	10.1391	10.0215	6.23193	7.53601	6.5622	12.3778	8.53043	6.05112	9.18919	2.30271	low
GSM1854836	1.39178	1	10.3736	10.4631	8.05834	6.8978	5.24944	7.02276	10.2609	10.5529	7.28728	7.02823	6.77563	12.181	8.00005	5.31903	8.62895	2.50517	low
GSM1855131	1.90685	1	7.1756	10.1416	10.6478	6.96322	6.45523	7.7472	9.69965	9.48361	7.46118	7.68265	6.91384	11.801	7.85904	7.83144	9.21376	2.73779	low
GSM1855127	1.47671	0	8.89805	9.8947	8.77726	7.00065	6.24675	7.42075	10.1155	10.9741	7.34531	6.03827	7.3328	11.9566	7.73218	6.39341	9.03792	2.55377	low
GSM1855069	0.835616	0	7.0682	10.2873	7.76142	6.81771	5.42785	6.06309	9.5342	10.729	6.83289	7.99475	5.51415	11.4636	8.54479	3.71355	8.95898	2.98946	high
GSM1855208	3.54247	1	6.91637	10.5544	9.9927	6.73246	6.66823	6.39719	9.57323	9.90312	5.9612	7.3967	5.74423	11.6586	7.86863	6.00776	9.61377	3.11842	high
GSM1854896	2.86301	1	11.2579	9.68456	9.56048	6.89013	6.47751	5.63252	10.0583	11.7424	8.14439	7.79986	6.47758	12.0137	7.8981	7.34971	9.82312	3.21287	high
GSM1854802	2.52603	1	8.95023	11.4894	9.90885	7.13208	6.14839	7.68886	9.50003	9.47551	7.01563	7.58819	6.03046	12.0875	8.18584	5.46745	9.25261	2.90529	high
GSM1855190	1.42466	1	8.02777	10.653	9.10109	6.97906	6.46875	6.0256	9.50015	10.6231	8.04983	7.70737	6.19746	11.8241	7.4216	6.07285	9.24444	3.43359	high
GSM1855188	3.71781	1	7.47569	10.1552	10.7462	6.58736	5.75409	7.2153	9.7952	9.53117	6.7103	7.90529	6.31398	11.9134	8.83272	6.38081	9.39223	2.55109	low
GSM1855033	2.76986	0	6.37862	10.368	5.58312	7.29301	7.49249	6.28898	9.66592	10.3504	7.21649	7.88035	6.82279	11.7585	7.62221	7.49432	9.13879	3.53218	high
GSM1855089	2.28493	0	9.70462	10.5361	8.09537	6.84114	5.95798	6.09627	9.64466	11.5812	8.14197	7.43438	6.80521	11.9324	7.58519	6.95268	9.15696	3.33131	high
GSM1855107	2.48219	0	8.61253	10.3824	9.868	6.928	6.5211	6.52934	9.90346	9.99723	6.68661	6.95747	6.49672	11.8239	7.32584	7.79736	9.15667	2.97384	high
GSM1855168	0.109589	1	6.85888	10.3475	7.39604	7.10878	5.69352	5.54941	9.99495	11.0325	7.93133	8.22431	7.04032	11.8211	8.24159	5.45658	9.31958	3.48125	high
GSM1854935	1.40274	1	7.16593	10.5084	8.11188	7.07932	6.07988	6.48171	9.57133	11.2495	9.47842	7.71384	7.33996	11.8057	7.91133	8.90635	9.82766	3.61063	high
GSM1854909	2.43562	0	7.96118	9.73835	11.4776	7.14088	5.97237	7.52587	9.78996	9.92155	5.65617	7.74485	6.54183	12.048	8.782	7.22936	9.67821	2.53104	low
GSM1855011	2.7726	0	7.22145	10.8047	11.1351	6.37715	6.24008	6.4845	9.84429	9.38364	7.83101	8.73527	7.6562	11.8103	7.70063	3.70849	8.90749	3.17676	high
GSM1855010	1.86575	0	7.28915	10.4353	7.93973	7.13792	5.87495	3.92102	9.78198	11.2732	6.39422	7.32979	7.44832	11.7645	7.9955	4.83159	8.75942	3.79179	high
GSM1854903	1.52877	1	6.74196	11.0504	7.17537	7.08307	6.94183	5.91704	9.75485	10.9389	9.17453	7.30926	6.90369	12.0607	7.0373	8.12414	9.62549	3.8748	high
GSM1854965	1.86301	1	6.49988	10.8139	10.0922	7.12778	5.88587	4.94766	9.38489	10.1465	6.40027	8.23396	7.84741	11.3267	8.1415	5.66671	9.73403	3.97891	high
GSM1855138	1.69589	0	7.08509	9.97064	10.4681	7.08545	6.95748	7.38459	10.0735	9.46732	6.75366	7.70836	6.37605	12.0961	8.58474	7.00526	9.80561	2.69141	low
GSM1855083	2.27945	0	6.64209	10.7974	9.94926	7.62387	6.26427	8.81621	9.33175	9.05988	6.0364	8.35053	6.08983	11.7017	7.72795	6.29858	9.06788	2.74597	low
GSM1855005	2.67671	0	9.50161	10.3606	9.27812	6.99595	6.01916	5.91693	10.1168	10.3999	7.40103	7.21058	6.36835	12.1423	7.98977	5.38458	8.85602	2.89506	high
GSM1854804	2.65479	0	10.6203	10.4547	9.20772	6.9794	5.99781	6.71163	9.79434	11.2009	8.84325	7.48965	7.15695	12.0886	8.03172	8.064	9.30699	3.09906	high
GSM1855039	0.731507	1	6.73092	10.8049	8.07325	7.15449	6.52141	3.19156	9.75033	11.1143	8.08963	7.81475	7.23183	11.3792	7.82536	8.25512	9.22484	4.39426	high
GSM1855063	0.956164	1	7.14949	10.0779	8.35891	6.84215	5.53756	5.78539	9.55165	11.0017	7.80121	7.81814	5.7874	11.5598	8.68782	4.92209	9.36338	3.13193	high
GSM1854985	1.88219	0	11.3992	9.93166	10.0971	6.67938	6.15587	8.24161	10.1963	10.8655	6.58133	7.27077	7.0252	11.9991	8.41248	5.57407	9.07632	2.14527	low
GSM1855237	0.49589	1	6.51248	10.7829	7.28342	7.80653	6.06222	4.42737	9.5889	10.4219	8.47196	8.32875	7.82314	11.7117	8.06224	8.58579	9.83222	4.37163	high
GSM1855221	1.92055	0	9.10441	10.4137	7.2932	7.55371	6.11801	7.93821	10.123	10.5105	6.69803	7.60611	5.88353	12.2034	8.87119	4.72293	9.36175	2.51498	low
GSM1855220	4.13699	0	6.45882	10.4863	4.88817	7.15198	7.65614	8.71799	9.26773	10.0264	8.5006	7.74598	6.48342	11.7343	8.37264	7.33999	9.24193	2.91073	high
GSM1855099	2.51233	1	7.42494	10.1477	8.45121	7.00952	5.57681	8.98764	10.1282	9.2467	6.09175	7.33093	6.37214	12.4148	7.93375	6.14355	9.0374	2.04556	low
GSM1854866	3.39178	0	5.72729	10.5391	7.67775	7.0903	5.64347	6.26973	9.7442	10.2971	5.47619	7.55244	6.19696	12.1434	7.77144	5.80336	8.97146	3.12116	high
GSM1855161	0.909589	1	9.6042	10.5831	8.55613	6.69336	7.10751	7.06689	10.0971	9.38853	6.46685	7.7981	6.28267	12.2448	7.93058	6.05375	8.87308	2.67277	low
GSM1854870	3.03836	0	7.96216	9.61919	10.4522	7.0644	5.67341	6.17412	9.84516	8.80794	8.14002	7.47773	6.54059	11.863	7.85362	5.21435	8.53124	2.61129	low
GSM1855176	3.69863	0	9.5	10.6513	9.30758	7.11135	6.62824	5.4141	9.86969	10.6292	7.90147	7.94243	5.95726	11.9154	7.9277	6.72435	9.74211	3.51678	high
GSM1854871	3.06849	0	8.77183	9.64945	9.91355	6.74378	5.83307	7.71142	9.68684	9.3798	6.76953	7.85769	6.01346	12.2174	8.23794	8.2081	9.12692	2.30291	low
GSM1855160	0.890411	0	8.02979	10.2157	8.87923	6.81795	6.57218	5.70925	9.40535	10.1405	6.91103	7.34355	6.82452	11.3726	7.96964	5.91859	8.98743	3.25453	high
GSM1855142	2.27671	0	7.62443	10.7141	10.043	6.95331	6.30214	5.65942	9.40038	10.3862	6.40883	7.88058	6.30937	12.0012	8.30617	6.94623	9.23365	3.39991	high
GSM1854923	3.63288	0	10.9943	9.97606	9.63433	6.57116	6.15934	7.27539	10.2745	10.517	7.94779	8.17125	6.69211	12.1472	8.34745	6.10521	8.67809	2.38652	low
GSM1855018	2.40548	0	8.98755	10.8302	8.56182	6.75652	6.14171	6.32838	9.59166	10.2658	7.94611	6.7751	6.83956	11.9273	7.69484	6.7055	8.75103	3.08334	high
GSM1854857	3.80274	0	9.63502	10.0093	11.8564	6.92206	6.2517	7.44582	9.82101	9.84343	8.27037	7.60417	7.26182	12.0476	8.24737	5.79046	8.48554	2.45258	low
GSM1855152	2.18904	0	9.19118	10.1328	10.0358	6.7986	5.60313	8.25817	10.5066	10.3344	7.14167	7.43543	6.73681	12.2526	8.50305	5.86527	9.0785	2.1173	low
GSM1854847	1.93973	0	8.95949	10.0029	7.84642	6.95653	5.63701	6.01124	10.6296	11.6387	6.32051	7.58683	7.3994	12.203	8.13863	5.52458	8.89836	2.89581	high
GSM1855119	2.13699	0	6.67653	11.0078	7.83767	7.154	5.24543	6.71145	9.58958	10.5674	7.21694	8.13843	6.90799	11.8223	8.25872	4.64297	9.52418	3.37318	high
GSM1855200	2.88493	1	7.06039	9.93082	9.45866	7.31481	5.95097	6.06833	9.41243	10.3515	6.54394	8.13392	5.34083	12.2222	9.45272	6.11642	9.53156	2.96864	high
GSM1855198	1.54521	1	7.46974	9.48953	5.73337	6.86468	6.74611	6.33368	9.30279	10.0981	6.96024	8.17583	6.17705	11.7283	7.98395	8.88261	9.30748	3.14393	high
GSM1855180	1.51781	0	9.31375	10.1599	10.0489	6.71146	5.59636	8.12379	10.0632	10.5556	6.70857	7.45234	6.80816	11.8455	8.35505	5.31952	9.6705	2.41545	low
GSM1854917	3.39452	0	8.34003	10.2242	10.7476	6.88734	5.65409	7.1085	10.2836	10.6404	7.04198	7.73205	6.43266	12.3094	8.74752	5.91789	8.87465	2.47018	low
GSM1854886	1.13699	1	6.63557	10.0915	6.62904	8.33995	6.32763	5.64361	9.81683	10.6868	8.88455	7.9041	7.38243	11.5191	7.88485	8.14298	10.3358	4.01778	high
GSM1855181	1.46301	0	8.27458	10.5576	7.46099	7.20039	5.85146	5.53822	9.69242	11.3642	7.51255	7.83817	6.25918	11.86	7.69743	7.45194	9.58775	3.62404	high
GSM1855044	2.70411	0	9.15631	9.90117	11.3785	6.85257	5.1956	7.46657	9.84774	9.06501	8.01016	8.19447	6.67136	12.0703	7.94314	6.70373	9.10862	2.45819	low
GSM1855229	5.69041	0	9.47872	10.067	6.87213	6.23282	5.63278	6.48518	10.3097	10.9324	6.71869	6.37505	6.04778	11.8776	8.18507	5.1963	8.94302	2.41265	low
GSM1855193	0.956164	0	6.90191	10.2763	10.4312	6.84261	6.95922	7.43485	9.73845	9.58033	7.78593	8.10922	6.85536	11.6591	8.28035	7.64943	9.4607	2.93501	high
GSM1854915	0.383562	0	8.72036	10.4408	7.91925	7.1901	5.63512	5.88366	9.93896	11.5858	8.64521	7.6085	7.06231	11.7786	8.02956	8.06865	9.44978	3.45144	high
GSM1855031	2.83014	0	10.3398	10.7132	9.48457	6.72763	5.35232	6.24531	10.0711	10.0727	7.03397	6.54038	7.11542	11.6824	7.90743	6.65967	8.61787	2.74684	low
GSM1855027	2.29315	1	8.57531	10.1765	7.19909	6.8052	5.98391	6.19075	9.8268	10.7242	6.09411	8.25568	6.63115	11.9178	7.75884	6.45492	9.27366	3.17438	high
GSM1854855	0.841096	1	6.23796	10.5726	6.75158	7.61656	5.89676	7.50566	9.53635	10.1856	7.00154	7.62463	5.73881	11.6902	7.27041	5.97105	8.5938	2.97276	high
GSM1855054	2.46575	0	11.3872	9.87243	10.9619	6.15219	6.027	9.07077	10.4564	10.6918	6.73581	6.96534	6.06398	12.4408	8.13808	5.0469	9.46565	1.67981	low
GSM1854928	3.39452	0	9.86453	9.66718	10.8413	7.18993	6.06841	8.71059	10.0571	10.2921	7.61222	7.78071	6.48121	12.0954	8.15925	5.59007	8.95524	2.09452	low
GSM1854972	2.51781	0	9.23974	10.3207	7.79245	6.8504	5.35634	8.53113	10.0805	10.2587	7.53888	7.64254	6.07755	12.2559	8.12773	5.86317	8.92727	2.20106	low
GSM1855007	3.09589	0	7.86792	11.1451	9.34315	6.64061	6.12038	8.47286	10.21	9.0176	7.52982	7.20834	7.06944	12.3416	8.01957	5.93777	8.40652	2.29655	low
GSM1855189	2.31233	1	6.99921	10.4983	8.28626	6.98492	5.73703	7.42976	9.80522	10.3834	7.5984	7.84256	5.53973	11.8971	8.19055	4.72798	9.31143	2.76758	low
GSM1855235	1.95342	1	7.36133	9.64902	8.63669	7.11816	5.75828	7.26115	9.25235	9.86087	7.01592	6.6996	6.89727	11.8181	8.17545	7.60396	9.39532	2.73667	low
GSM1855068	2.82466	1	7.88337	10.6863	8.14532	7.14039	5.7335	6.11857	9.55669	9.93205	5.69782	7.65	6.66589	11.5508	8.04091	6.21318	9.6622	3.34624	high
GSM1855209	2.65205	1	7.47005	10.7273	3.75288	6.80739	6.8392	6.82969	9.15829	9.84341	4.86828	6.93967	5.84157	12.4535	8.31634	7.97288	9.49802	3.10299	high
GSM1855110	1.86301	0	8.19904	10.4931	9.50741	6.8653	6.25244	6.60213	10.0265	10.1736	7.63675	6.98632	6.12288	11.685	8.17499	6.55079	9.31216	2.85667	high
GSM1854987	2.56712	0	9.52067	9.92254	10.0616	6.9779	5.43307	9.26871	9.81979	10.4779	6.84491	7.37002	7.06718	12.0984	8.26252	4.63507	8.84447	1.98098	low
GSM1855111	1.47671	0	7.95843	9.73584	9.42619	6.31239	6.15418	9.13227	9.74087	9.29909	6.82228	7.03946	6.81857	11.7466	8.50836	5.46226	8.38369	1.72482	low
GSM1854816	1.12877	0	8.92151	10.2121	10.1787	6.57461	5.92162	6.89965	9.67084	9.68312	6.28118	8.35429	6.32053	12.3216	8.30594	4.61627	9.41512	2.73197	low
GSM1854879	2.66849	0	11.0775	10.9533	10.882	6.8298	6.23171	7.23284	9.85645	9.61138	7.33296	7.21496	6.62123	12.0613	8.4758	8.28163	9.33692	2.71121	low
GSM1855169	2.0274	0	12.1229	9.73533	8.02922	6.50339	5.80404	6.59699	9.93133	11.1866	6.48274	7.50708	7.58225	12.0714	8.54077	4.91429	9.01978	2.59991	low
GSM1854908	3.12603	0	8.50854	10.5261	8.80487	6.98239	6.44485	5.13479	9.96307	10.8367	7.72684	7.90934	6.84685	11.8724	7.50282	7.93766	9.2375	3.61935	high
GSM1854967	2.53151	0	10.0354	10.1439	9.69695	6.59384	6.27731	8.15211	9.67387	10.779	8.77063	7.6483	6.83644	11.4632	7.84096	6.50122	9.37122	2.64283	low
GSM1855091	2.56438	1	9.2913	10.1275	7.7746	6.94583	6.01205	5.69747	9.96465	11.619	9.18483	7.89762	6.18075	11.8248	7.97517	7.19566	8.72361	3.17549	high
GSM1855088	1.28219	0	9.11872	9.82486	9.63797	6.599	6.01605	9.10875	10.1743	8.2708	7.26182	7.63172	6.93309	12.5931	8.21287	6.21549	9.04284	1.79433	low
GSM1854956	1.26027	1	6.95618	9.76507	5.76071	7.13573	6.62177	8.06246	9.68126	12.0371	5.99786	7.58072	5.56789	12.1388	7.70265	6.56224	9.2122	2.72297	low
GSM1855133	1.92055	0	11.7445	10.1458	8.5186	6.72526	6.08186	7.02339	9.8943	10.7208	7.22752	7.04382	7.18316	12.0723	7.95857	5.43657	8.88383	2.60769	low
GSM1855105	1.52055	0	9.31973	10.7297	9.98031	6.76699	5.61402	7.77981	10.0503	9.91901	7.48923	7.26247	6.7313	12.1341	7.93006	6.02543	9.08538	2.52902	low
GSM1855163	2.37534	0	8.17036	10.5929	9.39143	6.63596	5.99726	7.26158	10.2066	9.83996	6.754	8.46605	6.20747	11.9978	8.529	7.45865	8.58912	2.55026	low
GSM1854873	2.97534	0	6.42238	10.9898	10.0522	7.03517	6.98956	7.00428	9.58927	11.5784	8.16735	7.73379	7.14053	12.0269	7.88111	7.91312	9.32196	3.50601	high
GSM1854921	0.136986	1	9.41996	10.1414	10.3803	7.27304	6.91044	7.70328	9.84123	9.41136	7.90549	7.77999	7.18928	12.114	8.08668	7.57285	9.76745	2.83913	high
GSM1854937	2.66301	0	10.7525	10.0749	10.4912	6.82525	6.23134	6.96182	9.91491	10.1059	7.22858	7.86157	6.39242	12.2536	7.64756	4.33459	9.08017	2.64426	low
GSM1854920	2.60274	0	9.27626	9.79538	10.7339	6.7417	4.9668	7.67576	10.2027	10.1535	7.31206	7.31613	6.70119	12.1945	8.7019	6.84687	9.06334	2.12842	low
GSM1855203	1.08219	0	7.86709	10.7495	7.84197	6.78688	6.64346	6.42269	9.43603	9.45288	7.48927	8.44198	6.34357	11.3439	7.37624	5.84561	9.415	3.43185	high
GSM1854974	2.30137	0	8.56838	10.2102	9.90751	7.15042	5.90499	7.2374	9.91434	9.59232	6.20145	6.56274	6.49078	12.0053	8.17276	5.59595	8.98397	2.45861	low
GSM1855038	2.3863	0	6.4098	10.951	8.93383	7.39865	6.11258	7.16884	10.1811	9.35218	5.42118	8.24051	6.00736	11.9727	8.15697	5.47154	8.81222	2.83577	high
GSM1855183	4.63562	0	7.92431	10.333	9.71234	6.81468	6.50553	7.5691	10.1789	10.1039	6.45744	7.02398	7.05794	12.0201	8.33789	6.26592	8.87379	2.49117	low
GSM1855052	2.60548	1	7.87013	10.4592	8.79523	6.78031	6.22713	5.01223	9.81448	10.7317	8.51077	7.85166	6.63192	12.0891	7.65212	6.32009	8.85901	3.48925	high
GSM1854900	2.48493	0	12.5468	10.0441	9.40295	6.5998	5.82496	6.66226	10.3101	10.4745	6.73711	7.09457	6.95489	12.3759	8.19099	5.41332	8.90939	2.39462	low
GSM1855019	0.980822	1	7.04783	10.7098	9.22422	6.89275	6.28399	6.12701	9.71153	10.0925	7.72643	7.31225	6.98089	11.9157	7.77339	7.89332	8.88069	3.25963	high
GSM1855098	2.07945	0	10.9636	9.72339	8.38291	6.88744	5.73336	7.56463	10.5005	10.0928	7.01941	6.67254	6.95961	12.3434	8.1975	6.78511	8.57131	2.03119	low
GSM1855081	2.12877	0	7.33413	10.0604	9.52517	6.53938	6.55637	6.20878	9.70359	10.3399	7.04968	7.28428	6.04813	11.6732	7.65221	6.40369	8.57827	2.86031	high
GSM1855080	1.83836	0	6.59037	10.1257	10.3263	6.89602	5.79926	6.39072	10.0514	10.4271	7.02911	7.41677	6.55356	12.0325	7.89832	5.37779	8.95028	2.85803	high
GSM1855217	4.25753	0	7.21757	9.79589	10.1886	6.84314	5.45979	7.70266	9.8409	10.1478	6.96959	7.54865	7.59673	12.2387	8.46677	6.04475	9.29416	2.5319	low
GSM1855199	0.80274	1	6.17005	10.2316	6.18323	7.64346	6.84125	7.27058	9.17921	10.9219	8.83939	7.92881	5.59617	11.6424	7.07608	6.27379	9.6125	3.49093	high
GSM1855076	2.51233	0	11.019	10.1676	9.49069	6.43931	5.75151	6.05427	10.0284	10.489	7.65667	6.43741	6.80537	12.0901	7.73289	7.22205	9.03876	2.72269	low
GSM1855060	2.83014	0	6.76129	10.3372	10.0217	6.45072	6.88445	4.89696	9.13638	10.3616	6.36895	7.17547	6.52842	11.5326	7.98659	6.58238	9.66689	3.63455	high
GSM1855042	2.56712	0	7.93097	10.2893	10.5562	6.82389	5.98718	8.39629	9.82232	10.4783	6.9981	7.41396	6.48394	11.8722	8.27725	5.39111	9.32659	2.42653	low
GSM1854997	1.64384	1	9.07304	10.216	10.7437	7.43942	5.30215	10.1398	9.55945	9.82642	7.97713	6.70462	6.97764	11.7687	7.49835	4.14114	9.03165	2.00412	low
GSM1855061	2.07945	1	10.6778	10.216	9.87919	6.96312	6.19373	6.28999	9.72529	10.7253	6.80592	7.19493	6.8012	11.7899	7.9741	5.35398	9.08531	2.93291	high
GSM1855223	3.10959	1	9.29955	10.4925	10.8108	6.76039	6.31673	7.65856	9.79313	8.94894	7.09152	7.17732	6.44904	12.0654	8.32631	4.46374	8.94328	2.36134	low
GSM1855118	0.147945	0	8.4354	11.6866	8.08571	7.2045	6.23347	5.83299	10.0965	10.5369	7.22032	7.52081	6.42122	11.9892	7.37503	8.93113	9.93544	3.79157	high
GSM1854859	2.23014	1	8.00631	10.9762	8.7564	7.10821	6.46631	6.59358	10.2965	10.5415	6.31764	7.78376	5.57422	12.0907	7.6478	5.75256	8.68978	2.94681	high
GSM1855218	1.33973	1	8.69014	9.75732	10.6039	6.62923	6.03176	7.25473	9.93076	10.358	7.91893	7.38836	6.80028	12.1704	8.56862	6.04689	8.99798	2.42227	low
GSM1855123	2.08219	0	10.7655	10.7291	8.52898	6.73067	6.09776	7.10458	10.2635	11.2373	8.8443	6.73592	7.25909	11.9776	7.87373	6.10217	9.18137	2.83413	high
GSM1855097	2.33699	0	7.09765	10.8715	11.3537	6.52514	5.92874	9.16975	10.1401	9.24705	7.66104	7.1032	6.71518	12.0878	8.12595	5.60769	9.5011	2.21478	low
GSM1854942	1.44384	0	6.71941	10.1452	6.64033	7.34449	5.68504	6.79512	9.58761	9.75019	6.45729	7.83418	6.76368	11.7091	7.92197	6.78359	8.82154	3.00559	high
GSM1854960	2.6	0	7.84865	10.7763	11.2035	7.01999	5.65279	7.30477	9.44809	8.91105	7.91781	7.42798	8.01532	11.9227	8.36368	8.10012	8.55319	2.83076	high
GSM1854961	0.309589	1	8.09974	10.7781	9.30793	6.8631	6.43725	8.19458	9.3266	9.15826	5.98303	7.48853	5.99908	12.1346	7.99839	7.67971	9.11827	2.60648	low
GSM1855000	2.21096	0	7.2268	10.3209	8.42432	7.09231	6.89507	6.95814	9.58089	11.0386	7.21688	8.1118	7.04859	11.7217	7.7455	8.71298	9.68449	3.43154	high
GSM1855001	1.33425	1	8.45898	10.932	8.58474	7.88933	6.49195	7.21003	9.66426	9.83506	6.95042	8.18565	6.78035	11.5958	8.43739	5.96832	9.24728	3.22071	high
GSM1854919	2.69041	0	9.02969	10.1873	9.47151	6.85133	5.7741	6.39944	10.1134	10.2235	6.85307	7.40743	7.12406	12.0769	8.89362	6.81221	9.09422	2.72635	low
GSM1854952	3.03014	0	10.2392	10.0455	9.81478	6.75173	5.56138	7.31523	10.2229	10.6755	6.88424	7.62772	6.45076	12.5048	8.23485	5.8312	9.05055	2.38562	low
GSM1855117	1.28767	0	6.68645	10.8718	7.68979	7.57351	7.51403	6.09869	9.69554	10.0108	9.13967	7.4972	7.0907	11.4497	7.38167	7.61191	10.1246	3.95871	high
GSM1854849	4.0137	0	7.27869	10.4143	10.7306	6.93203	5.98347	7.96066	10.457	10.4618	6.97225	8.3925	7.1619	12.1979	7.9642	5.50868	8.93893	2.59506	low
GSM1854981	1.61918	1	7.72215	10.0284	7.12104	6.81039	6.60949	6.41535	9.21364	11.1664	7.38147	7.28323	4.92148	12.1243	8.64427	6.74855	9.73361	3.04398	high
GSM1854980	2.05205	0	7.55012	10.4595	7.78906	7.0094	5.93296	6.6387	9.96377	10.6973	7.30157	6.43773	7.55446	12.044	8.21577	6.29301	8.92056	2.93189	high
GSM1855225	2.8411	1	10.2949	10.6303	8.29093	7.00823	7.1002	8.80565	9.36117	9.85042	6.39014	6.72822	5.86555	12.0385	7.81182	6.13678	8.78674	2.32578	low
GSM1854998	2.33425	1	8.90308	10.9479	9.26637	7.04081	5.65372	7.5008	10.0951	10.6416	6.51773	8.79879	6.47002	11.7624	8.31608	4.33384	8.76452	2.79494	low
GSM1855103	1.55616	0	6.26063	10.818	5.78818	6.8629	6.85365	8.20698	9.57297	8.61482	4.95363	7.52756	5.80426	12.6014	8.4909	4.74227	9.4319	2.57305	low
GSM1854875	2.91233	0	6.78437	10.3235	10.3721	6.60998	6.34218	6.36264	10.0215	10.6108	6.67869	7.98087	6.7674	11.9514	7.78857	7.09356	8.85653	3.02682	high
GSM1855074	2.00822	0	8.6353	10.4434	6.52956	6.96805	5.85477	7.42857	10.3605	9.8751	6.92051	8.59232	6.6042	12.2083	7.97038	7.25537	8.93967	2.71663	low
GSM1855165	1.48219	1	8.30105	9.80296	10.3648	6.49655	5.92272	7.48392	9.61154	9.53867	6.49238	7.38509	6.32922	12.339	8.51939	6.43235	9.32529	2.35197	low
GSM1854938	0.216438	0	6.31758	10.9917	6.05204	7.04865	6.4285	3.96126	9.53319	11.8939	9.16973	7.89489	8.44263	11.4768	6.94836	9.51004	10.0457	4.86291	high
GSM1855037	2.89589	0	7.30872	10.4516	9.61162	6.81539	5.81732	7.49694	9.33463	9.50162	5.96524	7.8327	5.90401	11.7795	7.49819	6.27559	9.46841	2.86153	high
GSM1855021	2.43836	0	7.2709	10.7243	10.9237	6.80335	6.50676	5.65018	10.1459	10.1667	7.97658	7.99064	6.66667	11.8323	7.71896	5.63506	9.07812	3.32536	high
GSM1855020	3.25753	0	7.7179	10.4037	8.77298	7.37108	7.28136	6.20969	9.31978	10.1156	7.71174	6.65319	6.51109	11.6282	7.71633	8.88146	9.08434	3.34261	high
GSM1855185	2.9726	0	6.6921	10.639	11.242	7.00837	6.67025	6.02667	10.0525	10.3477	8.10273	7.38428	6.7093	11.6947	8.60821	6.61488	9.21466	3.1741	high
GSM1855008	2.25479	0	10.8549	10.3025	8.16368	7.21066	5.59216	6.08362	9.32343	11.4607	8.53737	7.88275	7.38409	11.6576	7.93657	6.24544	9.28224	3.43876	high
GSM1855056	2.90685	0	7.06042	10.1772	10.1116	6.4436	5.95729	8.15059	10.1483	9.86261	7.49515	7.54298	5.53598	12.4738	7.73965	8.18499	9.07253	2.25224	low
GSM1854988	2.15068	0	10.8812	10.0086	7.82627	6.72034	5.88265	6.0898	9.81373	11.5163	9.01087	7.34942	6.49784	11.9476	7.98133	5.7401	9.64562	3.09495	high
GSM1854990	2.27397	0	9.80962	10.4696	9.7401	6.81996	5.74936	9.97674	10.409	10.399	7.39593	6.86864	7.06001	11.8729	8.07542	6.96807	9.33386	1.91398	low
GSM1855067	2.70411	0	10.7792	10.3586	8.76253	6.91057	5.65365	6.84429	9.77885	11.8081	9.3891	7.95074	6.79439	11.9656	8.13982	6.40474	9.83771	3.16964	high
GSM1855072	1.86027	0	9.62269	10.5608	8.27461	6.92911	5.8113	6.42775	10.0437	10.9666	6.03843	7.16003	6.6072	12.0939	7.91217	4.76825	8.91417	2.87529	high
GSM1855046	2.5726	0	10.3653	10.2913	10.6247	6.38028	5.71517	8.42825	10.3243	9.52442	7.38068	8.82053	7.39813	12.1823	8.34391	5.50278	8.79946	2.17284	low
GSM1854907	2.93151	0	9.52526	10.1355	8.9439	6.91826	5.43332	7.04329	10.0356	9.96508	6.609	7.91685	6.75247	12.0505	7.47989	5.73357	9.08869	2.711	low
GSM1855211	4.4274	0	7.71486	10.1215	7.15402	6.83119	6.50436	7.74378	9.38564	9.09183	6.82924	8.48276	5.84159	11.9944	7.8179	4.87311	9.81601	2.8447	high
GSM1855087	2.56986	0	10.8403	10.7955	8.61939	7.04684	5.38422	6.89395	10.2124	10.8086	7.81945	7.02386	7.31684	12.0496	8.35192	7.28463	8.9826	2.79635	low
GSM1855210	5.04932	0	9.97476	9.89467	8.55584	6.8589	6.70911	7.29652	9.67804	10.1031	5.69626	6.88357	6.17833	12.3336	8.18896	4.49116	9.38018	2.48793	low
GSM1855109	1.89863	1	6.45607	10.5949	9.85754	7.32465	7.07108	6.86199	9.7863	10.2699	6.13386	7.39032	6.42385	11.3307	7.9956	6.8568	10.1262	3.34092	high
GSM1855135	1.47671	0	8.8491	10.5613	8.09878	7.00563	7.11237	7.31965	9.45095	9.83727	7.49414	7.31127	6.48236	11.6931	6.83996	6.34334	8.81147	3.03626	high
GSM1854843	3.08767	0	8.7234	9.72948	10.291	6.74836	5.92537	9.59441	9.79719	10.7944	7.07428	7.02103	6.94713	12.0294	7.7235	5.84763	8.82075	1.94193	low
GSM1855028	2.49589	0	7.47308	10.7493	9.93313	6.91161	6.76987	8.4099	10.588	8.18163	6.08145	8.03425	6.00884	12.229	8.31757	6.16528	9.3681	2.26357	low
GSM1854913	1.85205	0	6.99997	10.4944	8.84718	7.02943	6.47361	6.86306	10.0444	10.8203	6.68168	8.19449	6.70327	12.0273	7.93711	4.45021	9.06819	3.0659	high
GSM1855195	2.80822	1	6.45309	9.98271	10.0875	7.06092	5.17274	5.98932	9.66242	8.74417	6.9085	7.09373	6.0151	11.9691	8.34897	5.29929	9.32234	2.7754	low
GSM1854954	2.72877	0	8.07872	10.5378	8.57554	7.13049	6.27744	5.49856	9.80033	11.5253	9.44799	8.1482	7.61742	11.7079	7.02624	7.6987	9.67944	3.97617	high
GSM1855129	1.72055	0	10.2235	10.1376	7.72173	6.53076	6.20976	6.45262	9.87238	10.5606	6.28513	6.87601	6.46611	12.0964	7.75687	4.43909	9.3507	2.77755	low
GSM1854944	3.19452	0	9.54145	9.95818	10.1137	6.84861	6.14354	6.31796	9.80765	10.4125	7.58144	8.46844	6.45237	11.7145	8.31196	6.78298	8.90294	2.89623	high
GSM1854930	2.53699	0	8.10318	10.2372	9.35565	7.0922	5.63036	6.30678	9.96599	10.6471	7.52581	7.71042	7.2216	12.1788	8.41956	6.66641	8.50131	2.89707	high
GSM1854853	0.753425	0	7.2962	10.4451	7.11932	7.36546	6.44277	7.05673	9.81235	10.7608	6.32981	7.53546	7.69524	11.6092	8.44119	7.75026	8.88871	3.11049	high
GSM1854931	2.61918	0	11.6628	10.3214	9.82461	6.76026	6.01265	8.0332	10.286	10.2236	6.80679	7.44474	7.03153	12.3037	8.33248	4.24698	8.56189	2.11957	low
GSM1854927	0.208219	1	8.9792	10.3889	10.2089	7.06059	7.11445	5.81415	9.86921	9.99991	7.49746	7.83059	6.54411	11.9741	7.74436	8.13369	9.57053	3.36882	high
GSM1854814	2.33973	0	7.47948	10.0195	10.6125	7.15736	5.99544	8.0178	9.55822	9.1845	7.11395	7.41221	6.94254	11.83	8.4292	3.85384	9.80697	2.58924	low
GSM1855015	2.37808	0	11.5657	10.4662	7.78413	6.35675	5.33547	6.58408	9.75958	10.82	7.99457	7.21346	6.64586	12.0028	8.198	6.79819	8.88368	2.71051	low
GSM1855101	2.52055	1	6.84988	10.1467	9.70699	7.32851	6.26508	7.87301	9.15536	8.76127	7.32225	6.90593	7.34113	11.5444	8.39258	7.24413	9.13372	2.71803	low
GSM1854806	2.4411	0	6.42313	9.74389	9.69347	6.63691	5.44919	7.78962	9.4932	10.924	7.17855	7.42816	6.82009	12.1158	8.62984	6.61427	8.82105	2.44637	low
GSM1854892	0.668493	1	9.30387	10.8155	10.7892	7.22029	7.13422	7.58292	8.94974	9.05889	7.14914	7.75778	6.25887	12.02	7.99116	6.16759	9.63908	3.07705	high
GSM1855100	2.37808	0	6.03902	10.6045	6.07475	6.93943	5.71762	6.33582	9.91141	9.68238	8.10355	7.87164	5.99166	11.8945	7.71265	5.11324	8.92802	3.10809	high
GSM1855219	0.591781	1	6.90969	10.3611	7.67109	7.22451	5.85347	5.11356	9.48693	9.74508	7.11851	10.0532	6.29908	11.8629	7.98951	8.72041	9.37736	3.82767	high
GSM1854925	0.734247	0	7.72532	10.6345	10.317	7.17233	5.84346	7.65326	9.99861	9.8891	6.39013	8.13613	5.9496	11.9998	8.51482	4.70622	9.719	2.72025	low
GSM1854848	3.39726	0	11.5909	9.76168	8.84003	6.82873	6.24517	6.1325	10.0404	10.8517	7.19624	7.97884	7.68799	12.0768	8.44581	5.31385	8.81846	2.82453	high
GSM1854999	2.45753	0	9.2516	10.5558	10.3493	6.38997	6.10448	7.3565	9.5644	9.60475	7.3602	7.1052	6.40799	11.8418	7.91941	6.5395	9.13141	2.61949	low
GSM1855023	3.21644	0	6.31891	10.103	8.90771	7.13371	5.89433	8.33315	9.39072	8.43601	5.83571	7.02817	5.81644	12.2292	7.49215	5.58352	9.20006	2.37087	low
GSM1854918	3.16712	0	8.82223	9.73755	9.74566	7.08143	6.06614	7.79527	10.6546	10.3052	8.35503	8.36715	7.05018	12.0403	8.25151	5.7061	8.7179	2.33826	low
GSM1855120	0.591781	1	6.65019	10.5437	9.54853	6.80843	6.52451	4.00139	10.0274	10.9265	7.91334	7.37846	7.38247	11.6243	8.06659	8.68891	9.20834	3.87489	high
GSM1855137	1.52603	0	6.62139	9.74209	9.3216	6.84401	6.18422	6.62181	9.4787	9.60289	7.18507	7.57557	6.1367	11.9885	8.24227	8.44801	9.30494	2.84666	high
GSM1854826	4.07671	0	11.5027	9.57267	9.82726	7.19513	5.76908	8.02011	10.3441	10.6291	6.8377	6.86524	6.82757	12.4887	8.0759	5.2707	8.68351	1.98564	low
GSM1855121	0.805479	1	6.82153	10.841	7.86737	7.22573	5.95012	5.60555	10.3653	10.7701	6.81261	6.87573	7.07246	11.9173	7.59144	5.57774	8.8258	3.31696	high
GSM1854884	0.89863	1	9.1013	10.6865	9.18305	7.21334	6.45422	6.12298	10.0568	10.5528	6.93644	7.04723	5.94095	11.9107	7.57879	5.54519	8.97935	3.0594	high
GSM1854963	0.0958904	1	6.40357	10.768	7.83565	7.26911	5.94848	4.96067	9.18867	12.087	10.4952	8.3509	7.18855	11.4539	7.80234	7.04103	9.68494	4.34223	high
GSM1855085	2.66027	0	8.78758	10.868	7.4535	6.85473	5.93092	5.16713	9.18015	9.59587	8.43507	7.27407	7.33579	11.687	8.66558	9.01642	9.37884	3.62112	high
GSM1855003	2.32329	0	7.64755	10.4075	8.96995	7.11604	5.62369	6.50907	10.2769	11.1682	6.40997	7.05447	7.32826	12.0494	7.55674	5.67333	8.56319	2.91941	high
GSM1854832	3.0411	0	11.3469	10.8357	10.8261	6.65981	5.34971	7.57026	11.0201	10.657	6.7813	7.06832	6.46993	12.9523	8.42601	6.17573	8.53885	2.0318	low
GSM1855174	1.47945	0	8.4442	10.3833	9.84764	6.94953	7.26046	7.56121	9.70843	10.2319	7.11469	8.79138	6.06125	11.9054	8.51272	7.96457	9.31765	2.89926	high
GSM1855065	1.98356	0	6.92194	10.8441	8.71834	6.57441	5.18555	6.54876	9.52901	10.0388	7.37439	6.6552	6.67629	11.5073	7.49615	7.65083	9.28588	3.11867	high
GSM1854983	0.317808	1	6.30325	10.4538	7.974	7.45298	6.14772	5.91203	9.83177	9.89125	7.75176	8.17651	6.94283	11.8604	8.82532	4.31349	9.19499	3.31886	high
GSM1854864	1.09041	1	7.99758	10.3051	10.481	7.18283	5.82991	8.91429	10.3889	10.7669	6.13254	6.92205	6.96753	12.233	7.80356	4.94018	8.65703	2.11591	low
GSM1855238	4.46301	1	8.10094	10.472	7.59129	7.05633	6.23566	7.40059	9.51998	9.02628	6.16566	8.46716	4.70669	11.9063	8.58098	5.06074	9.2901	2.63452	low
GSM1854862	4.3726	0	7.72396	10.4058	8.66214	7.00552	6.34687	5.71125	10.123	10.7416	6.08842	7.4186	6.802	11.7686	7.87413	6.8503	9.11407	3.23765	high
GSM1854840	1.33699	1	11.3604	9.8278	8.59462	6.7345	5.45896	6.14095	10.3397	10.5384	5.93906	7.44616	6.1323	12.0218	7.90208	4.21928	8.82544	2.4775	low
GSM1855207	3.54247	0	6.01644	11.1254	8.17408	7.46288	8.09405	3.92437	8.97346	11.11	5.04211	7.20903	6.40474	11.3406	7.27083	8.21506	10.2102	4.7172	high
GSM1855172	2.18356	0	8.2876	10.6081	10.9242	6.78416	6.19913	8.33595	10.2591	10.3053	7.08938	7.19133	7.8636	11.7716	8.11931	6.19391	9.356	2.56645	low
GSM1855146	0.389041	0	10.9587	10.6715	10.21	6.78935	6.67867	7.02472	9.99721	10.5977	8.10184	7.57905	6.70599	11.8523	8.09695	5.52429	9.02393	2.81865	high
GSM1854841	2	0	6.48619	10.8233	4.50327	7.9586	5.96161	5.44096	9.65227	10.3655	8.97289	8.36665	6.80671	11.5634	7.23151	7.25527	9.75973	4.16924	high
GSM1854989	2.63562	0	10.4787	10.0328	10.8203	7.36331	5.81723	9.0488	10.0337	10.5536	7.10508	7.29609	6.56992	12.1974	8.68445	3.99694	8.95438	1.96523	low
GSM1855187	2.49863	1	6.58918	10.3507	6.48805	7.48911	5.42218	9.4876	10.2247	8.44227	6.37653	7.45685	4.74241	12.7504	8.386	4.00205	8.82375	1.71334	low
GSM1855009	2.07123	0	6.81953	10.844	9.47584	7.50445	6.36446	7.03696	9.41715	8.37157	5.99686	8.28732	6.25149	12.2389	7.72559	5.84192	9.11437	3.1052	high
GSM1854911	2.73699	1	8.68069	10.0989	10.047	6.63978	5.4104	7.5498	9.55549	11.5861	8.56959	7.3106	7.25774	12.0136	7.55053	6.61333	8.26176	2.65029	low
GSM1854910	3.14247	0	11.4956	9.9714	10.2034	6.71889	6.40688	6.31991	10.5947	10.3598	6.84526	7.09017	6.63922	12.1004	7.81924	7.45812	9.04147	2.5594	low
GSM1855035	2.94247	0	9.48123	10.5313	8.65809	6.88642	5.94094	6.47446	10.0067	11.3757	9.17417	7.27	6.84642	11.9831	7.91366	7.48663	9.18267	3.11239	high
GSM1854834	2.80548	0	8.17241	9.99084	10.1719	7.07321	5.91344	11.0336	9.73886	10.167	6.87498	6.53661	6.97659	11.9866	8.61606	6.07836	8.89159	1.52481	low
GSM1855108	2.51507	0	6.50376	11.1403	8.16991	7.94847	5.61247	7.63773	9.78187	10.5121	7.84752	7.63248	7.06684	11.8177	8.1375	6.73944	9.32399	3.26442	high
GSM1854969	0.975342	0	7.19586	11.3422	10.378	6.58648	6.63524	5.89981	8.80496	8.66221	7.2008	8.05652	6.9029	11.5755	7.68585	3.58427	9.00809	3.58107	high
GSM1854882	1.52603	0	8.70442	10.4529	10.9465	6.68867	6.48677	8.74522	9.45035	9.63265	7.85508	7.95779	6.67928	11.8131	8.09491	6.39923	8.94828	2.44108	low
GSM1854850	4.61644	0	10.5035	9.36608	10.2076	7.25118	5.94584	9.53682	10.3804	9.48535	6.62093	8.03826	6.86331	12.5019	7.55591	6.17011	9.19468	1.8173	low
GSM1854851	5.33973	0	9.05887	9.93326	10.6581	6.77968	5.52382	9.01861	10.0799	9.86935	8.03322	7.67924	6.38571	12.208	8.66017	5.8782	9.05946	1.90529	low
GSM1855156	2.67945	0	8.85572	10.1699	7.30305	6.40866	6.61017	5.91113	10.2467	11.3896	5.6437	7.45003	6.16319	11.6299	8.21969	7.12415	9.32087	2.9842	high
GSM1854933	2.2411	0	6.41343	10.7619	7.46883	7.07871	6.10106	7.4574	9.40572	9.16451	5.47792	8.34115	6.16942	12.194	8.56891	6.17148	9.62303	2.99284	high
GSM1854877	2.12603	0	9.62433	10.3075	8.43942	7.0592	5.73857	7.16293	10.1719	10.9484	6.42909	7.54539	6.02514	12.1078	8.15438	4.01121	8.91841	2.55493	low
GSM1855029	2.13699	1	8.47606	11.2438	7.50227	7.08676	7.49296	5.37467	9.60456	10.9215	9.11998	7.29678	7.73512	11.1783	6.98537	7.59378	9.43302	4.15883	high
GSM1855230	4.52603	0	7.41995	10.5795	9.69441	6.81364	6.21383	8.96433	9.90793	10.1093	7.15053	7.3512	6.96427	12.1468	8.28009	4.91865	9.68966	2.46222	low
GSM1855231	1.33973	1	6.70848	10.8904	8.96273	7.4184	5.53345	7.15777	9.74627	10.1164	6.56813	8.59036	5.49309	11.9352	8.26814	4.7285	9.3882	3.04827	high
GSM1855095	1.58356	0	6.33768	10.4479	9.65409	7.06475	6.72448	6.41142	9.38848	9.60838	7.22554	7.25911	7.22233	11.7257	7.78553	6.08327	9.17064	3.28683	high
GSM1855213	4.66575	0	10.2749	10.2014	10.1522	6.56263	6.35574	7.6546	9.53822	10.0397	6.96575	7.36944	5.98318	12.2772	8.35944	6.93397	9.08762	2.40236	low
GSM1855128	2.48219	0	7.83937	9.91613	8.0083	7.77797	5.81294	6.67236	10.0887	9.97254	5.69815	6.52855	7.54502	11.8086	8.39536	6.01577	9.32293	2.8361	high
GSM1854992	1.51781	0	7.10322	10.914	7.55909	7.2694	5.81614	6.107	10.1062	11.7026	8.86912	7.07923	7.80741	11.8623	7.96608	8.1839	9.35075	3.59375	high
GSM1855047	2.79178	0	6.18078	10.8784	8.31747	6.85901	6.26586	6.70754	10.0014	9.21522	6.37965	6.99232	7.05869	11.7608	8.21753	4.49547	9.18557	2.96021	high
GSM1854906	3.13973	0	8.84639	10.0502	11.8161	6.46452	6.26701	7.76115	10.4849	8.82621	8.44591	8.06774	6.62522	12.0008	8.655	8.70626	9.41983	2.26145	low
GSM1855086	2.41644	0	9.90002	9.63658	9.29238	6.83355	6.02858	7.44291	9.67408	9.85973	7.09238	8.04185	6.36416	11.8358	7.51027	7.11262	8.87746	2.52992	low
GSM1854958	2.52329	0	9.01308	9.93582	9.52016	6.66959	5.86321	8.92401	9.83153	10.1122	5.90264	7.93293	6.73115	12.2304	8.75828	6.99312	9.33037	2.11195	low
GSM1854825	3.6411	0	10.1563	9.89076	9.96721	6.87456	5.58946	8.4694	9.84323	9.71478	7.13757	7.94224	6.97797	11.8899	8.63405	7.56518	9.14552	2.20112	low
GSM1855024	2.75616	0	7.83211	10.2692	7.19375	6.85466	6.11837	7.24969	9.8272	10.9425	6.96995	7.25567	6.2324	11.7404	7.53026	4.62626	9.17865	2.85144	high
GSM1854948	0.849315	1	9.59998	10.278	6.97627	6.85188	4.92888	7.02622	9.58431	10.0528	6.76428	8.28126	6.16892	12.2646	8.15353	5.4431	9.17732	2.74697	low
GSM1855212	4.27123	0	7.8747	10.5479	7.42006	6.62635	6.37888	7.20559	9.78579	9.88653	5.71651	7.49265	7.221	11.9161	8.00546	5.50795	8.78904	2.79174	low
GSM1854899	0.358904	1	10.2289	10.4551	7.98946	7.09446	5.90785	8.85163	10.353	10.2934	7.53263	7.14326	6.9076	12.3138	8.14944	7.36729	9.25012	2.25161	low
GSM1854818	1.59452	0	8.87308	10.0814	8.45405	6.65047	6.44682	6.30132	9.93029	10.1511	7.00943	8.0807	6.84488	11.7935	7.91526	7.78384	9.11077	3.01507	high
GSM1855057	0.208219	0	6.51694	9.90282	8.3721	8.03542	5.99238	6.83982	9.72914	10.0777	7.51787	7.28592	5.81618	11.8298	7.51111	8.77434	9.58616	3.13608	high
GSM1855071	1.63562	0	10.1184	9.74483	8.00416	6.58851	6.14002	4.90244	9.43667	11.8803	9.17372	7.48274	6.51218	11.4187	8.17728	7.28415	9.80567	3.54173	high
GSM1855066	2.73151	0	9.82394	10.3154	8.3185	6.79919	6.06011	6.40983	9.51031	10.4679	8.31645	7.28387	7.01198	11.842	8.48564	7.23818	8.8047	2.94425	high
GSM1855070	2.72329	0	9.68782	10.3891	10.3996	6.43087	6.49685	6.83506	10.0865	10.0268	6.62156	7.13048	6.82259	12.4764	7.9588	8.70371	9.5497	2.753	low
GSM1854839	2.51233	0	10.7797	9.75215	10.016	6.93164	5.73158	8.79211	10.2738	10.4444	7.21737	7.65381	6.78444	12.0649	8.27071	6.16315	8.53046	1.8839	low
GSM1855004	2.81918	0	8.44443	10.7498	10.1103	7.47044	5.61291	6.30569	10.3866	10.3692	7.48058	7.8125	6.92341	12.259	8.44974	5.16718	8.62201	2.92198	high
GSM1854805	2.28219	0	7.37944	10.6987	7.34168	7.03817	6.83164	5.07445	9.512	10.6295	7.7082	7.40551	6.87446	11.837	9.00388	7.76166	9.2319	3.61671	high
GSM1854926	0.717808	0	10.2013	10.5191	10.579	6.38923	6.3747	7.42782	9.94258	10.2962	5.90672	7.54605	7.75194	11.7814	8.26543	5.61001	9.09747	2.64635	low
GSM1854863	4.07671	0	9.12525	10.2504	10.8687	6.7323	4.99458	8.77341	10.1942	8.83971	6.8834	7.25908	6.27735	12.4149	7.38813	6.62876	8.54368	1.85091	low
GSM1855173	1.85205	1	7.08223	10.008	7.34097	7.80286	5.62939	8.37531	9.45912	10.2219	7.93158	8.16426	7.81176	12.2192	8.41052	3.43102	9.13377	2.81124	low
GSM1854932	2.19726	0	6.50691	10.266	10.6893	6.73131	5.81946	5.62492	9.9538	10.1348	7.45315	7.70449	6.95964	11.4712	7.87439	6.22062	9.17806	3.2319	high
GSM1854964	1.7589	0	6.58731	9.92716	8.3016	6.94022	5.81037	5.84518	9.60621	12.033	9.58856	7.99997	7.56656	11.744	8.18914	7.48539	10.0189	3.70169	high
GSM1854883	2.94247	1	6.49608	11.4922	4.70718	7.1045	6.67687	8.53085	9.89486	9.55239	7.6978	7.27573	5.44388	12.2502	7.10708	7.69544	9.61507	2.9889	high
GSM1854889	1.04932	1	10.8432	11.0366	9.51671	6.92719	4.91528	8.21565	10.1873	10.1807	6.36092	7.3715	6.96737	12.3748	7.28517	4.30296	8.67402	2.39366	low
GSM1854941	1.88767	0	6.99439	10.1154	9.61096	6.80401	7.34548	6.57298	9.41863	9.20148	6.42906	7.66904	7.15115	11.942	7.45646	7.54913	8.90159	3.11388	high
GSM1854962	2.2137	0	8.74407	10.0986	10.7758	6.86555	5.31977	6.98067	9.7617	10.6939	7.21335	7.18549	6.78847	12.1187	8.2796	6.94354	8.90413	2.6207	low
GSM1854940	2.59452	0	10.8641	10.3463	8.93714	7.25353	5.97739	6.72856	9.71442	9.59304	8.06213	7.5491	6.97027	12.1352	7.29286	5.92823	8.86815	2.9318	high
GSM1854810	2.53425	0	6.90633	10.4697	7.5071	6.84727	6.78688	5.34341	9.75373	9.68826	7.00409	7.42574	7.09573	11.8209	8.31211	6.88154	9.02021	3.37553	high
GSM1855116	1.8411	0	8.01176	9.57382	8.2824	6.92349	6.42362	8.12653	9.98433	9.16559	7.51876	7.56225	7.09021	11.1779	8.03282	5.36626	9.21848	2.38594	low
GSM1854811	2.88493	0	8.52576	9.94003	9.96611	6.99071	5.85445	9.17298	9.87743	10.9946	7.66754	8.03936	6.90776	12.2373	8.33339	4.96325	8.82858	2.1812	low
GSM1855078	2.41644	0	8.17887	11.5197	9.12425	7.31077	6.51203	7.4173	9.35379	9.141	6.12725	7.67067	5.32639	12.4544	8.2322	7.81995	9.33465	3.02414	high
GSM1854934	2.32603	0	7.98786	10.5176	10.5251	7.09693	6.18703	7.51284	10.2096	10.6915	6.59188	7.8809	6.99119	12.2594	8.20679	6.20143	9.21607	2.77784	low
GSM1854869	2.11233	0	10.6457	10.0625	9.22865	6.97331	5.52664	7.85553	10.2184	9.69501	8.10622	8.29616	6.33011	12.5849	7.97091	5.47022	9.07279	2.32745	low
GSM1854951	0.219178	1	9.30202	10.0258	9.66068	6.49416	5.80307	6.20007	10.2174	11.3148	7.50429	6.81037	6.76988	11.9913	7.27709	6.06993	9.10432	2.85134	high
GSM1854833	4.09315	0	12.343	9.60887	7.40381	6.90325	5.1964	6.42267	10.2734	10.875	6.00214	7.03779	7.57606	12.4969	7.94637	4.69899	8.4092	2.39118	low
GSM1854950	2.39452	0	10.0094	10.0567	8.34347	6.73887	5.9699	6.91996	10.0947	11.3259	7.07171	7.43938	7.22832	11.996	8.28904	5.60617	9.04372	2.72074	low
GSM1855096	2.23562	0	7.15697	10.3904	5.87015	6.49847	7.27863	7.61347	9.42172	10.1997	4.9527	7.89629	5.05831	12.0983	7.95607	8.57733	9.42926	2.82653	high
GSM1854977	1.89589	0	7.42894	10.2955	10.3362	6.67667	6.47488	6.25709	10.2682	10.8472	5.65105	7.48282	6.40906	11.9033	8.00697	5.65211	8.99073	2.8672	high
GSM1855145	2.21644	1	10.616	10.0307	9.44885	6.69957	6.30371	7.28571	9.6763	10.5748	8.38188	7.42574	6.3649	11.695	8.04946	4.27532	9.22954	2.63292	low
GSM1855036	2.55342	1	12.1456	9.99555	8.23267	6.50359	5.5168	6.45495	10.1147	9.90577	6.51072	7.17509	7.05488	12.0896	8.3539	4.1633	8.9382	2.42358	low
GSM1855214	5.02466	0	7.71499	10.5886	9.88908	6.83746	5.58533	8.82539	9.76254	10.724	6.50657	7.19293	6.59361	12.3112	8.47969	5.74358	9.26271	2.34068	low
GSM1855022	2.27671	0	9.64754	10.6405	7.36687	8.15644	6.56683	5.39006	9.67923	10.4363	8.22848	7.69349	7.35502	11.9075	7.70472	7.07045	9.31882	3.83261	high
GSM1854994	2.47945	0	9.41921	9.87362	10.5156	6.81293	5.90268	8.2631	10.1659	10.7181	6.40501	7.12654	6.24126	12.2675	8.18392	5.1517	9.23044	2.12525	low
GSM1855157	2.20822	0	8.48066	10.3148	9.3389	6.69183	5.444	6.99314	9.88548	11.1217	8.06427	7.82821	6.9304	11.9807	8.50709	8.07603	8.79901	2.7799	low
GSM1854861	0.2	1	7.27242	10.2122	7.46453	7.05038	6.3749	6.06396	9.2858	10.1411	5.19401	7.7485	8.29039	11.893	7.79555	6.15527	9.57565	3.562	high
GSM1855166	1.86027	0	7.56593	9.58689	10.8321	6.771	6.35595	5.94495	9.5767	10.5659	7.0838	8.12093	6.43082	11.2802	8.12892	8.06012	9.71881	3.19969	high
GSM1855170	1.47945	0	9.14338	10.2776	8.29002	6.90084	6.53712	7.13234	9.62299	10.1407	6.41807	7.78246	6.35726	12.0518	8.38948	3.8943	9.01827	2.72207	low
GSM1854876	2.48493	0	7.87679	11.6807	9.55023	7.54095	5.85894	8.86595	10.1002	9.77726	5.14654	8.35389	5.8913	12.4757	8.12812	4.97981	9.71329	2.74721	low
GSM1855171	3.16438	0	8.52525	10.0826	6.65494	6.94623	6.61492	5.33298	9.69736	10.3334	7.5856	8.42472	5.99942	11.6369	8.62327	7.99995	8.72435	3.23881	high
GSM1854842	2.95616	1	10.2367	10.3507	9.36568	6.84092	6.07783	6.24952	9.89253	10.9462	6.86148	7.42983	6.80332	11.9447	8.48621	6.27953	8.81343	2.86344	high
GSM1854860	1.19452	1	9.09893	10.2575	9.37018	6.99038	6.03381	6.4242	9.94257	11.7441	7.6489	8.02402	7.14245	11.991	8.21846	7.51568	9.37005	3.20926	high
GSM1855147	2.21096	0	8.10263	10.2898	8.26689	6.69998	6.44676	6.85804	10.0016	10.5943	7.31588	7.61003	6.62096	11.9833	8.1621	7.18437	8.99306	2.84443	high
GSM1855206	1.86575	1	7.06406	9.79452	5.65125	6.33619	7.12859	5.78453	9.01577	10.3846	7.77767	6.82677	6.61566	12.1447	7.0378	9.72825	9.11954	3.39594	high
GSM1854852	4.29863	0	11.2011	10.0371	10.2031	6.7587	5.72312	9.46509	10.3846	10.0465	5.98224	6.87561	7.38215	12.4364	8.34817	4.93433	9.05498	1.68657	low
GSM1854880	2.33425	0	7.50387	10.4386	6.47084	7.12291	6.25854	4.82557	9.68783	10.5244	6.64387	7.35661	6.90223	11.2335	7.68584	8.08517	8.92223	3.6596	high
GSM1854881	2.00548	1	6.88251	10.4372	6.29724	7.31125	5.537	5.95646	9.67013	11.0521	7.84271	7.78426	7.10079	11.8774	7.33183	5.40878	8.87557	3.50024	high
GSM1855124	2.98356	0	6.76801	10.8974	5.53853	7.43432	5.93772	7.19598	9.2759	9.05997	7.24399	7.83394	5.84163	12.3392	8.08655	6.54366	9.11527	3.0914	high
GSM1855232	2.08767	1	7.80471	10.6095	8.78037	6.94488	6.81704	5.55907	9.955	10.842	8.45719	8.39226	6.18994	11.7779	8.61807	8.51195	10.1479	3.64057	high
GSM1854838	3.3726	1	6.33311	10.5007	7.79738	7.13484	5.84939	6.30731	9.78443	11.2764	7.32912	8.1234	7.6326	11.5216	7.15453	7.76402	9.90469	3.77782	high
GSM1854975	2.49589	0	5.91531	10.5791	6.11952	6.93619	6.74584	4.75805	9.73929	11.5835	7.71315	7.32424	6.85041	11.9578	7.65302	6.07022	9.67711	3.982	high
GSM1855104	0.268493	1	9.00933	8.60743	6.20113	6.92972	6.42747	5.74033	8.93265	11.8018	8.65371	7.50769	6.65476	11.3912	7.84835	8.7839	9.3078	3.26712	high
GSM1855226	4.38082	0	9.16738	10.7107	9.85049	6.90721	6.06255	7.4523	9.82876	10.3178	6.61201	7.96593	6.89821	12.1751	8.49266	6.25206	9.75564	2.90575	high
GSM1855073	2.85479	0	9.55557	10.4021	10.423	6.81606	5.54213	6.78056	9.6412	9.86752	7.47143	7.10913	6.84097	11.917	7.61332	5.02213	8.68868	2.72353	low
GSM1855079	0.920548	1	6.87029	10.4433	10.4623	7.00582	5.89242	7.34338	9.33704	9.74323	8.69424	7.83255	7.20609	11.7947	8.06947	5.27839	9.24471	3.02991	high
GSM1854888	2.30137	0	10.39	10.4599	7.58421	7.31445	5.18261	7.90117	9.99808	10.2134	7.3428	8.18423	6.61346	12.2461	8.33011	4.14288	8.90943	2.50531	low
GSM1855196	4.27397	1	10.682	9.91258	11.2691	7.5319	6.16397	7.59655	9.371	10.6838	8.97459	7.50019	7.09663	11.9395	8.02385	6.36795	9.78623	2.93863	high
GSM1854891	1.21096	1	7.65948	10.9661	9.14064	7.49241	5.54105	5.78317	9.19542	9.99281	7.69072	8.976	6.10365	11.4117	7.50978	6.96293	9.75032	3.87834	high
GSM1855102	1.66301	0	9.68049	10.9472	9.62228	6.7274	6.18061	8.85537	10.1646	10.2133	7.53513	6.55032	5.88636	11.84	8.17847	5.86667	8.93623	2.11539	low
GSM1854890	3.04658	0	8.19299	10.5761	8.07974	7.18049	5.31886	5.9014	10.161	10.5361	7.55727	8.17237	6.38237	12.1673	8.62796	6.26051	8.85674	3.04974	high
GSM1854807	1.43562	1	9.91747	9.81654	8.05175	6.62286	6.22922	6.59256	9.6984	10.5784	7.02953	7.16878	6.86424	11.9804	7.65852	6.92552	8.79274	2.75401	low
GSM1855016	2.72329	0	9.15891	10.1649	8.84977	6.97009	6.24719	6.98129	9.79624	10.0883	7.18128	7.59821	5.77565	12.0477	8.30287	6.43396	8.23632	2.47931	low
GSM1854868	1.17808	1	6.92391	10.9697	8.68304	7.30864	6.85102	3.49944	9.31345	12.2739	8.59503	9.91969	6.79199	11.5608	7.04218	6.94381	9.05383	4.85197	high
GSM1855234	4.63836	0	7.95473	10.6577	10.1327	7.31239	5.464	5.21794	9.35024	10.2862	8.6711	8.96062	6.69366	11.4798	7.82195	6.92628	8.872	3.72178	high
GSM1855178	0.158904	1	6.58879	10.6542	8.02109	7.28435	5.93738	5.4372	9.72662	10.838	8.80877	7.69459	7.80222	11.3807	7.75493	9.13449	9.14451	3.82195	high
GSM1855122	2.07397	0	7.68858	10.424	9.87217	6.49247	6.58669	7.03129	9.55219	9.5213	7.6382	7.53641	7.3454	11.8423	8.45309	6.3654	8.84257	2.81127	high
GSM1854813	2.26027	0	9.15258	9.61854	10.6163	6.54164	5.97629	8.1791	9.95641	10.766	6.87838	7.42503	6.26148	11.8645	8.30031	5.79077	9.05705	2.1246	low
GSM1854854	4.12877	0	10.0826	9.71005	8.81097	6.9329	5.76998	9.1957	10.5089	10.9374	5.79699	7.67633	6.61969	12.3135	8.50657	6.03737	8.44272	1.69757	low
GSM1855055	2.94795	0	11.0462	10.1584	8.78505	6.75437	6.1602	6.51181	10.0362	10.9199	6.01084	7.37464	5.99957	12.0576	7.97633	5.12464	9.20599	2.69784	low
GSM1854844	0.528767	1	6.63816	10.272	10.9803	7.45298	4.38919	8.02488	10.0567	8.80118	6.76945	8.4276	7.03411	12.5056	8.91797	4.8449	9.0328	2.33059	low
GSM1855045	2.35616	0	11.1975	9.94439	10.4662	6.5827	6.28465	7.213	9.84091	10.4374	7.39104	8.5492	7.17395	12.2691	7.90156	7.76465	9.3169	2.76879	low
GSM1854953	4.87397	0	9.30347	9.68589	7.69841	6.97419	5.79128	8.06181	10.0196	11.1377	6.05333	7.53891	6.4222	11.6966	7.59046	4.61995	8.7369	2.33131	low
GSM1854831	0.860274	1	8.00057	10.2221	9.2261	8.51296	5.69036	6.1148	9.95529	9.75908	8.5707	8.39458	6.59081	11.9447	6.70718	7.53175	9.22172	3.56133	high
GSM1854827	1.5863	0	5.98361	10.2672	10.8935	6.79085	6.55445	6.23693	9.60521	9.34032	8.15602	8.40468	7.43864	11.7852	7.35517	7.23158	9.63524	3.48696	high
GSM1854830	3.62466	0	8.28652	10.0242	8.80046	7.06566	5.98115	7.64199	10.5473	11.029	6.91628	7.2228	8.05175	12.8165	8.44369	5.26319	8.92217	2.48194	low
GSM1854945	5.43562	0	8.55887	10.2865	10.5912	7.20063	6.23473	6.10277	9.66602	10.0722	7.59793	8.49235	6.37664	11.6751	7.94782	7.33322	9.74172	3.36218	high
GSM1854815	2.24658	0	9.50092	10.1295	9.12077	6.74593	6.4699	7.70387	9.93179	10.5694	7.42502	7.92389	6.98444	11.4285	8.42042	6.29886	8.91102	2.58753	low
GSM1855014	3.06575	1	9.48329	10.9087	10.0181	7.15038	5.53886	7.5727	10.4396	10.7315	7.67822	7.36561	7.40859	11.9673	7.89539	4.87888	8.92771	2.71746	low
GSM1855053	2.78082	0	7.62594	9.70322	11.1106	6.7909	5.88964	8.16779	9.92607	9.91294	6.70118	8.0086	6.6512	12.4748	8.15629	4.83129	9.46577	2.33596	low
GSM1855236	4.52603	0	7.43308	10.636	10.0236	6.66659	5.95708	7.63499	9.90884	10.6427	6.55655	7.56455	6.55874	11.77	8.2688	5.72939	9.33614	2.73013	low
GSM1855222	3.73425	0	10.6269	9.94017	7.91305	6.77987	6.48519	6.1106	10.0444	11.2513	6.89735	7.53859	6.29177	11.6915	8.45857	7.41713	9.0169	2.84706	high
GSM1855043	2.81918	0	9.81468	10.8007	9.31685	7.16179	6.46359	7.25074	9.58209	10.0767	5.81006	8.04764	5.87153	12.0718	7.51627	4.38714	9.44766	3.00258	high
GSM1854955	2.07671	0	6.75339	10.4752	10.3328	7.16034	5.745	8.50109	9.61033	9.44557	7.72709	7.68851	6.86403	12.1188	7.40905	5.45289	9.03435	2.63108	low
GSM1854799	2.89589	0	6.64442	10.6348	10.0869	7.1371	6.03268	4.37382	9.99681	10.6333	6.98302	7.01435	7.55501	12.0212	7.59767	6.36268	9.47725	3.81778	high
GSM1854828	3.24932	0	9.71618	10.3272	10.5397	6.83751	5.95041	7.66179	10.0242	9.56441	6.96711	7.23078	6.68618	12.2368	7.87917	4.81399	8.42216	2.26862	low
GSM1855162	2.01096	0	8.09153	10.0805	10.5894	6.78252	5.73967	7.05161	9.58683	10.278	7.05478	6.93267	6.03948	11.8409	8.43608	6.53519	9.44305	2.63201	low
GSM1855140	2.27397	0	9.7723	10.5007	9.62987	7.05801	6.1909	7.13281	9.80092	9.77462	7.35306	7.02407	7.048	11.8862	8.5213	5.66804	9.29152	2.73751	low
GSM1854872	2.31233	0	6.46067	9.77488	9.6135	6.89689	5.95117	8.06167	9.71035	10.9872	8.32076	8.12431	6.91005	12.0874	7.69812	6.06215	8.96038	2.6917	low
GSM1855141	2.24932	0	10.7543	9.7468	11.5689	6.71807	5.87896	8.58055	9.55825	9.41828	6.53957	8.14303	6.51236	11.7047	8.04236	5.63844	8.42796	1.99069	low
GSM1854846	2.28219	0	10.6658	10.1565	9.52206	7.01778	5.6871	8.15611	9.90027	9.53579	7.34981	8.0295	6.74737	12.0914	7.83533	4.57539	9.36255	2.43629	low
GSM1855134	1.04658	1	10.8736	10.1506	8.8285	6.66651	5.51672	6.72778	10.076	10.609	6.87408	6.73676	6.77328	12.0883	8.49706	5.78099	9.25425	2.52344	low
GSM1854887	1.11233	0	10.6191	10.6308	8.38028	7.42425	6.6081	8.5582	10.2651	9.61445	8.74645	7.30794	6.51686	12.5589	8.02474	5.37836	9.17695	2.39237	low
GSM1854916	3.1589	0	9.01023	10.6418	7.27961	8.10673	5.53381	8.34093	10.0195	10.532	7.80278	7.88312	6.97352	12.0596	7.9502	4.80323	9.02755	2.79302	low
GSM1854979	2.05753	0	11.3676	10.2372	8.16851	7.33093	5.99185	6.66479	9.97631	10.7593	6.45487	7.23882	6.90941	12.0418	8.6377	3.57321	9.18662	2.74869	low
GSM1854808	2.83562	0	10.7552	10.23	8.68663	6.81671	5.27681	6.58102	10.1829	11.0987	7.40513	7.43547	6.93879	12.2598	7.73064	6.95198	8.90307	2.76321	low
GSM1855177	1.56164	0	8.56021	10.096	8.39537	6.71156	6.93228	7.86822	10.537	10.2813	6.52688	6.9534	6.60676	12.0577	7.49583	5.78771	8.77712	2.33028	low
GSM1855202	1.71781	1	6.88008	10.5369	4.75644	7.01615	6.13523	6.66954	9.67547	10.2805	6.8873	8.21203	6.05475	11.7322	9.39863	7.79122	9.56704	3.12045	high
GSM1854867	4.05753	0	6.44959	10.4163	10.4265	7.19252	5.30925	6.38051	9.99019	10.0891	6.99724	8.51048	6.84287	12.3676	8.15448	4.62331	8.66468	2.97861	high
GSM1855150	0.268493	1	6.98843	10.4524	8.20237	6.62791	6.1113	6.85876	9.10249	9.75055	6.74329	9.29681	6.20564	11.1569	7.95593	4.29281	9.09098	3.21678	high
GSM1855151	2.1863	0	10.1674	10.6759	11.5576	6.7117	5.3953	9.28669	9.65513	9.87593	6.81916	7.56339	6.7396	11.8601	7.72028	5.65401	8.56468	2.08284	low
GSM1854856	2.47945	1	7.03405	9.9545	7.93474	6.9074	6.52527	5.89193	9.84901	10.2672	7.46563	8.37657	6.32695	11.8016	7.77087	6.57546	9.18165	3.25034	high
GSM1855204	2.7589	1	6.75507	10.6795	11.1198	7.06275	5.7676	7.35113	9.6887	10.5128	6.96858	7.81086	6.98775	11.9023	8.42075	7.8659	9.6128	3.05637	high
GSM1854973	2.50137	0	8.29312	10.7149	10.6482	6.99756	5.62148	9.68336	9.82875	9.8189	7.88124	6.86319	5.95924	11.9354	8.64555	4.90689	8.65537	1.84057	low
GSM1855184	0.610959	1	9.97515	10.4525	9.13222	6.38302	6.71545	7.72552	10.2687	10.2625	7.41179	7.64893	6.37777	12.2579	8.1773	6.04348	9.21077	2.45227	low
GSM1854837	0.126027	1	9.16784	9.56993	8.98451	6.6785	6.10125	7.39587	10.0323	9.34112	8.32071	8.45115	7.55272	12.0741	8.3012	8.17524	9.25094	2.59016	low
GSM1854821	3.45205	0	7.51306	10.8998	9.21149	6.67408	5.79477	8.24846	10.2526	10.5197	6.85478	7.54805	7.14987	12.2708	8.54496	4.5968	8.85086	2.44751	low
GSM1855126	1.58082	0	6.64869	9.67732	11.0548	6.73931	5.55755	7.87531	9.61765	8.24143	9.54838	7.85877	6.12961	11.4229	8.41254	7.09464	9.2008	2.3167	low
GSM1855132	2.35068	0	10.786	10.1179	8.52456	7.15327	5.92369	6.57697	9.8506	10.9647	7.87073	6.83369	7.25289	11.8504	8.24399	7.52211	9.36831	2.94074	high
GSM1854874	2.3863	1	11.8941	9.91361	7.91799	7.09753	5.25007	6.31383	9.88789	10.659	7.13343	7.6126	6.88383	12.2689	8.81355	5.97918	8.72443	2.61102	low
GSM1855075	2.45753	0	7.41729	10.4094	10.4107	6.76188	6.08442	8.64275	9.60591	10.6769	7.07809	7.46684	5.72183	11.9681	8.27058	7.38746	9.55782	2.47711	low
GSM1855164	2.27397	0	7.65499	10.5618	9.86317	7.18499	6.68308	6.7891	9.4404	8.82051	7.37711	7.35452	7.06463	12.0619	8.62454	7.84813	8.99466	2.96095	high
GSM1855192	0.654795	1	7.57605	10.2959	10.1345	6.82304	5.7253	7.38487	9.02041	9.19657	6.65354	7.77206	6.01726	11.683	8.12117	6.7199	8.69769	2.65909	low
GSM1855106	0.838356	1	7.13195	10.7792	5.90395	6.50699	6.45138	4.81738	9.81888	10.0342	7.03204	6.91167	6.8836	11.3715	8.19895	7.20653	8.5722	3.40561	high
GSM1854801	2.45205	0	10.9528	10.7369	9.46565	6.85571	6.11701	7.31379	10.1392	9.9165	7.79654	6.99505	7.04359	12.0942	8.31676	7.81309	9.08626	2.61475	low
GSM1854800	2.80822	0	8.73743	10.2716	9.9815	7.56665	7.03846	7.57687	9.84745	11.1215	5.79734	8.23175	6.12991	12.143	8.50044	6.02208	9.27834	2.85376	high
GSM1855224	1.69315	1	7.07275	10.1097	9.28027	7.11104	6.15171	7.03141	9.5257	11.505	8.82737	7.98032	6.70627	11.3682	8.17467	6.74426	9.53668	3.2364	high
GSM1855158	1.91233	0	8.23942	10.7795	10.979	6.95992	6.17333	8.57329	10.2719	10.5945	6.16241	7.12649	7.3105	12.3134	8.73657	5.63712	8.80164	2.28093	low
GSM1855049	0.6	1	7.71475	10.8284	9.13669	6.91016	6.0544	6.58759	9.60707	10.4121	6.62852	6.674	6.54994	11.6326	8.22376	6.74047	9.23812	3.05226	high
GSM1855012	2.95616	0	6.77433	10.7791	10.8159	6.91449	6.45272	5.90182	10.012	10.5239	7.13899	7.88212	7.35428	11.7275	7.90785	6.32179	9.20473	3.43097	high
GSM1855059	1.61096	0	7.32898	10.0403	11.1704	6.65561	5.2158	8.09518	9.73306	9.79299	6.47316	7.75679	5.62731	12.2216	8.52665	6.31074	9.43093	2.2386	low
GSM1854897	0.950685	1	7.04327	9.81897	9.4426	7.11575	6.069	6.58687	9.93962	10.5434	7.28309	7.70612	6.13722	11.9371	7.78223	6.41174	9.14436	2.89201	high
GSM1854922	3.15068	0	10.941	10.101	8.47751	6.95848	5.83292	6.12209	10.4117	11.0708	6.0809	7.54658	6.51421	12.2125	8.34916	4.30177	9.05955	2.7066	low
GSM1855143	1.61918	0	7.74849	10.1597	10.4679	6.92633	6.06858	7.35116	9.89767	9.71566	7.41572	7.87223	6.58543	11.9872	8.45842	6.19226	9.00511	2.59439	low
GSM1855094	1.66301	0	7.2404	9.8708	9.23904	6.94334	6.44474	6.6474	8.85678	8.70735	6.56555	7.0513	5.90555	11.7209	7.83372	6.82692	9.49004	2.93934	high
GSM1854895	0.857534	1	6.49402	10.4708	7.00798	8.41445	6.40441	4.03987	10.263	11.2201	8.28658	8.5144	6.8839	11.6916	7.9305	7.59258	9.35472	4.25864	high
GSM1854829	3.15342	0	6.65612	10.8415	11.1076	7.38072	6.29916	5.15124	9.89841	10.4188	7.36493	7.97372	7.59791	11.521	7.95351	5.5138	9.57625	3.83559	high
GSM1854798	3.42192	0	10.6252	10.601	8.77512	6.71504	6.55284	7.44034	10.077	9.6634	6.83585	6.79225	6.68465	12.0756	8.32939	5.59651	8.54096	2.3446	low
GSM1855114	1.93973	0	9.49161	10.1353	8.35592	7.63553	6.1666	5.83564	9.8003	10.4705	8.60888	7.56641	7.21803	11.8036	7.73526	5.40281	9.4506	3.41509	high
GSM1855153	0.890411	1	7.7369	11.1204	7.87301	6.92781	6.09807	6.80238	9.18689	10.4184	7.92039	7.23787	6.74716	12.0211	7.60901	6.40584	8.87301	3.30499	high
GSM1854936	2.63562	0	8.98203	9.98224	9.455	6.95568	5.4569	9.86873	9.71441	9.58476	6.73202	7.57024	6.29812	12.1929	7.79484	6.25654	8.77112	1.8214	low
GSM1855082	1.63014	0	8.71988	10.6877	9.45654	6.87246	5.78854	8.36783	10.1633	10.456	7.49406	7.22671	6.75504	12.0406	7.66801	5.98998	9.06339	2.48654	low
GSM1854996	1.78356	1	9.32673	10.1585	10.7213	7.03506	5.63281	7.39025	9.62918	9.79762	6.80523	6.91561	5.85109	12.0594	7.79695	5.94405	9.13568	2.47665	low
GSM1855077	2.34247	0	7.9296	10.1285	8.23706	6.44885	5.43395	9.31455	9.54559	9.49906	7.40746	6.69569	6.84242	11.5809	8.13808	6.98072	8.72633	1.96031	low
GSM1855051	1.70411	0	10.1596	10.0883	9.79606	6.97952	5.68096	9.35932	9.90693	10.0831	7.69342	8.01064	6.93333	11.8492	7.73996	8.06468	9.2294	2.23515	low
GSM1855050	1.91233	0	9.88133	10.1829	10.4847	7.00958	6.56723	7.01895	9.85894	9.6502	7.08575	8.46287	6.78471	11.9333	7.80656	5.84563	9.18922	2.86824	high
GSM1855041	1.02192	0	9.20004	10.5302	8.42443	6.90281	6.0834	7.29835	9.85113	10.0913	6.75853	7.91208	5.98678	12.1523	8.36937	6.02064	9.13255	2.68144	low
GSM1855062	1.64384	1	9.1653	10.5422	9.59823	6.64876	6.6371	5.47594	9.54326	9.95999	5.67669	9.05463	7.15696	11.5856	8.20126	5.94154	9.61122	3.56841	high
GSM1855040	2.21096	0	9.02198	11.2173	7.16575	7.11796	6.12424	6.58769	9.93286	9.36381	6.19321	7.14853	6.43637	11.9498	7.62344	6.44236	9.04586	3.07041	high
GSM1855034	2.21644	0	10.6024	10.4074	7.04739	6.8221	5.46596	6.71647	10.53	11.5532	5.81638	6.32755	7.13587	12.529	8.08687	4.07177	9.1283	2.58724	low
GSM1854835	3.10685	0	10.0863	10.3496	8.6834	6.58046	6.54742	6.16022	10.0375	10.36	7.5179	6.96182	6.79154	11.8758	8.04542	6.37248	8.72684	2.81514	high
GSM1854809	0.117808	0	10.5286	10.0334	10.7357	6.98404	5.79328	8.23899	9.80716	10.1502	7.88748	8.12829	7.57901	12.2492	8.789	6.91799	9.24856	2.43055	low
GSM1855032	2.2411	0	7.94104	10.7577	10.1886	6.98538	5.21383	9.08622	10.8192	10.2813	6.90988	7.03749	6.65364	11.8159	7.20361	5.27326	9.46377	2.24418	low
GSM1854803	2.6274	0	11.2052	9.97937	8.20624	6.97666	6.21566	6.33803	9.75938	11.2213	8.71001	7.71031	6.69351	12.2658	7.89781	6.7	9.5454	3.10658	high
GSM1855064	2.68493	0	10.3561	10.4467	8.12399	7.13072	5.93138	5.10181	9.60265	10.4459	7.24781	7.55181	7.00508	11.2618	8.3483	8.03922	9.22523	3.46586	high
GSM1855175	1.0411	1	7.46215	10.4899	10.4939	6.72279	6.87256	6.88184	9.99488	10.5027	7.02165	7.96699	6.10281	11.9273	8.52497	5.82083	9.52502	2.92834	high
GSM1854865	4.44658	0	6.86723	10.8565	9.50103	7.10664	5.50713	8.44611	10.0716	10.6962	5.33691	6.82398	7.37812	12.1962	7.34322	4.03865	9.14779	2.63606	low
GSM1854904	2.90685	0	8.65606	10.179	8.04935	7.12213	5.32644	6.24452	10.1774	11.1935	7.30842	7.87538	6.25764	11.7997	8.10805	5.12437	9.10652	2.95626	high
GSM1854885	1.44658	1	6.67675	10.7188	8.17922	7.32068	5.36009	7.52802	10.2227	10.4314	8.17034	8.18529	6.83539	12.1059	8.26011	5.02956	8.90412	2.84585	high
GSM1855084	2.51781	0	8.06177	9.84606	7.74673	7.26112	5.68051	9.45091	10.5256	9.25563	6.36104	7.58244	6.02931	12.5785	8.1844	4.5204	8.94902	1.71699	low
GSM1855026	2.84384	0	10.5029	11.2133	7.85623	7.14897	6.085	5.46185	10.001	10.469	6.57631	7.08272	6.89791	11.8706	7.47356	8.13714	9.00872	3.45894	high
GSM1855112	2.24658	0	7.65911	10.3507	10.5686	6.92189	5.81954	7.19684	10.1035	10.5168	7.34335	6.46554	7.15637	11.9391	8.57227	6.50189	9.00033	2.57117	low
GSM1855159	2.3589	0	8.0201	10.3219	10.2141	6.98608	5.77776	9.2966	9.85163	9.45318	6.83589	7.47876	6.09571	12.3244	8.15818	6.33337	8.98794	2.02344	low
GSM1855048	1.7863	1	7.99916	10.7298	5.65487	6.49545	4.69123	7.31908	9.83761	8.90471	6.98306	8.018	5.39936	11.9147	8.398	4.69838	9.52656	2.57305	low
GSM1854971	1.33973	0	9.51805	10.3225	7.62157	7.10886	6.23554	6.25601	10.1165	11.4974	7.83436	7.43379	7.03318	11.7392	7.58596	6.89833	9.17828	3.23146	high
GSM1854970	1.07397	0	7.3525	9.77205	6.9722	6.82099	6.48661	6.54005	9.72641	10.4391	7.18479	7.13061	6.63144	11.3769	7.62159	7.99107	8.58697	2.88493	high
GSM1854823	2.18904	0	10.4441	10.5584	8.61613	6.47647	7.09501	6.84482	9.59589	9.74334	7.24837	7.56045	5.79155	12.1473	8.0396	4.3592	8.39884	2.60633	low
GSM1854957	0.775342	1	6.98203	10.2935	11.101	6.88665	6.12113	8.38181	9.47852	10.1519	5.95515	7.86205	6.41286	12.2103	9.2413	5.86152	9.50851	2.44808	low
GSM1855006	2.70685	0	6.73586	10.6622	7.50056	6.91927	5.91085	7.15817	10.0407	10.5337	8.44126	7.47588	7.24206	11.8475	7.66356	6.89773	8.58854	2.97745	high
GSM1854947	0.769863	1	6.264	10.6426	7.98873	7.35341	7.48117	7.06039	9.46532	9.42516	7.56919	7.44178	6.69147	12.2337	7.86766	6.10638	9.10854	3.20609	high
GSM1855092	2.00548	0	11.3186	10.709	8.92506	6.58312	5.63309	7.23053	10.0482	10.3754	6.3774	6.23851	7.42465	12.158	8.25136	5.23697	8.75139	2.4224	low
GSM1854924	0.339726	0	11.53	10.0784	9.92328	6.91858	5.71546	7.1426	10.3303	10.2317	7.0181	7.44551	6.46652	12.1675	8.26256	4.70072	8.97627	2.33067	low
GSM1854817	0.813699	0	7.66331	9.29677	6.78848	7.02466	5.11414	8.20373	10.1616	9.44682	6.47492	8.26792	7.60697	11.9966	8.3621	4.14018	8.63994	2.12996	low
GSM1855149	2.27945	0	7.74726	10.1733	9.28986	6.6237	5.66101	8.6731	9.90642	10.8515	7.24192	6.97125	7.1318	12.0095	8.29233	6.24915	8.67403	2.20127	low
GSM1854986	1.58082	0	6.75497	10.3437	10.5076	6.86519	6.59732	6.16834	9.74914	10.6387	7.81412	7.37199	6.73577	11.6122	7.57814	6.81894	9.35783	3.30695	high
