# Supplementary material for: Construction and validation of a 15-gene ferroptosis signature in lung adenocarcinoma
Source: PeerJ. 2021 Jul 7;9:e11687. doi: 10.7717/peerj.11687 (PMC8272465; doi:10.7717/peerj.11687)
Supplement: Supplemental Information 7 [file peerj-09-11687-s007.xlsx]

## Sheet: riskdiff.GO
ONTOLOGY	ID	Description	GeneRatio	BgRatio	pvalue	p.adjust	qvalue	geneID	Count
BP	GO:0019730	antimicrobial humoral response	22/408	137/18866	2.08387e-13	7.89997e-10	7.15098e-10	CTSG/SLPI/S100A9/DMBT1/TF/REG1A/KRT6A/PGC/CXCL5/S100A8/WFDC12/FGA/PLA2G1B/DEFB1/SFTPD/S100A7/PI3/FGB/PRSS2/S100A12/PRSS3/CLU	22
BP	GO:0007059	chromosome segregation	32/408	334/18866	1.93262e-12	3.66327e-09	3.31596e-09	NDC80/KIF4A/KNL1/HJURP/CDCA5/NEK2/NCAPH/KIF23/SKA1/MAD2L1/FAM83D/ECT2/TOP2A/OIP5/CDC6/PLK1/CCNB1/SPC25/CDCA2/CENPF/NCAPG/KIF14/TTK/CENPE/DLGAP5/KIF2C/PRC1/SKA3/BIRC5/BUB1B/SGO1/MKI67	32
BP	GO:0140014	mitotic nuclear division	29/408	286/18866	5.38842e-12	6.80917e-09	6.1636e-09	NDC80/KIF4A/IL1A/CDCA5/NEK2/NCAPH/KIF23/MAD2L1/ANLN/MYBL2/CDC6/KIF11/PLK1/CCNB1/CENPF/CDK1/TPX2/NCAPG/KIF14/TTK/CENPE/DLGAP5/KIF2C/PRC1/BIRC5/CDC25C/BUB1B/SGO1/MKI67	29
BP	GO:0000070	mitotic sister chromatid segregation	20/408	161/18866	3.1738e-10	3.00797e-07	2.72279e-07	NDC80/KIF4A/CDCA5/NEK2/NCAPH/KIF23/MAD2L1/CDC6/PLK1/CCNB1/CENPF/NCAPG/KIF14/TTK/CENPE/DLGAP5/KIF2C/PRC1/BUB1B/SGO1	20
BP	GO:0000280	nuclear division	32/408	428/18866	1.19244e-09	9.04107e-07	8.18389e-07	NDC80/KIF4A/IL1A/CDCA5/NEK2/NCAPH/KIF23/MAD2L1/ANLN/MYBL2/TOP2A/CDC6/KIF11/PLK1/ASPM/CCNB1/CENPF/CDK1/TPX2/NCAPG/KIF14/TTK/CENPE/DLGAP5/KIF2C/PRC1/BIRC5/CDC25C/BUB1B/RAD51/SGO1/MKI67	32
BP	GO:0000819	sister chromatid segregation	21/408	196/18866	1.7923e-09	1.13244e-06	1.02507e-06	NDC80/KIF4A/CDCA5/NEK2/NCAPH/KIF23/MAD2L1/TOP2A/CDC6/PLK1/CCNB1/CENPF/NCAPG/KIF14/TTK/CENPE/DLGAP5/KIF2C/PRC1/BUB1B/SGO1	21
BP	GO:0006959	humoral immune response	29/408	377/18866	3.8635e-09	1.82825e-06	1.65492e-06	CTSG/SLPI/S100A9/MFAP4/EXO1/DMBT1/MS4A1/TF/REG1A/KRT6A/CR2/PGC/CXCL5/C7/S100A8/C4BPA/CPB2/WFDC12/FGA/PLA2G1B/DEFB1/SFTPD/S100A7/PI3/FGB/PRSS2/S100A12/PRSS3/CLU	29
BP	GO:0019731	antibacterial humoral response	12/408	59/18866	3.98504e-09	1.82825e-06	1.65492e-06	CTSG/SLPI/DMBT1/TF/PGC/WFDC12/FGA/PLA2G1B/DEFB1/SFTPD/PI3/FGB	12
BP	GO:0048285	organelle fission	33/408	476/18866	4.34036e-09	1.82825e-06	1.65492e-06	NDC80/KIF4A/IL1A/CDCA5/NEK2/NCAPH/KIF23/MAD2L1/ANLN/MYBL2/TOP2A/CDC6/KIF11/PLK1/ASPM/CCNB1/CENPF/CDK1/TPX2/NCAPG/KIF14/LRRK2/TTK/CENPE/DLGAP5/KIF2C/PRC1/BIRC5/CDC25C/BUB1B/RAD51/SGO1/MKI67	33
BP	GO:0098813	nuclear chromosome segregation	24/408	272/18866	6.27165e-09	2.37758e-06	2.15217e-06	NDC80/KIF4A/KNL1/CDCA5/NEK2/NCAPH/KIF23/MAD2L1/FAM83D/ECT2/TOP2A/CDC6/PLK1/CCNB1/CENPF/NCAPG/KIF14/TTK/CENPE/DLGAP5/KIF2C/PRC1/BUB1B/SGO1	24
BP	GO:0051983	regulation of chromosome segregation	15/408	107/18866	1.00927e-08	3.47832e-06	3.14854e-06	NDC80/CDCA5/NEK2/MAD2L1/ECT2/CDC6/PLK1/CCNB1/CENPF/TTK/CENPE/DLGAP5/KIF2C/BUB1B/MKI67	15
BP	GO:1902850	microtubule cytoskeleton organization involved in mitosis	17/408	144/18866	1.49713e-08	4.7297e-06	4.28128e-06	NDC80/KIF4A/NEK2/KIF23/MAD2L1/MYBL2/CENPA/KIF11/PLK1/CCNB1/SPC25/TPX2/TTK/CENPE/DLGAP5/PRC1/BIRC5	17
BP	GO:0007052	mitotic spindle organization	15/408	118/18866	3.89993e-08	1.13728e-05	1.02945e-05	NDC80/KIF4A/NEK2/KIF23/MYBL2/KIF11/PLK1/CCNB1/SPC25/TPX2/TTK/CENPE/DLGAP5/PRC1/BIRC5	15
BP	GO:0007088	regulation of mitotic nuclear division	17/408	163/18866	9.52933e-08	2.48802e-05	2.25213e-05	NDC80/IL1A/CDCA5/NEK2/MAD2L1/ANLN/CDC6/KIF11/PLK1/CCNB1/CENPF/TTK/CENPE/DLGAP5/CDC25C/BUB1B/MKI67	17
BP	GO:0007051	spindle organization	18/408	183/18866	9.84444e-08	2.48802e-05	2.25213e-05	NDC80/KIF4A/NEK2/KIF23/MYBL2/TPPP/KIF11/PLK1/ASPM/CCNB1/SPC25/AUNIP/TPX2/TTK/CENPE/DLGAP5/PRC1/BIRC5	18
BP	GO:0030071	regulation of mitotic metaphase/anaphase transition	10/408	56/18866	2.93837e-07	6.96209e-05	6.30202e-05	NDC80/MAD2L1/CDC6/PLK1/CCNB1/CENPF/TTK/CENPE/DLGAP5/BUB1B	10
BP	GO:0007091	metaphase/anaphase transition of mitotic cell cycle	10/408	58/18866	4.14324e-07	8.72613e-05	7.89881e-05	NDC80/MAD2L1/CDC6/PLK1/CCNB1/CENPF/TTK/CENPE/DLGAP5/BUB1B	10
BP	GO:1902099	regulation of metaphase/anaphase transition of cell cycle	10/408	58/18866	4.14324e-07	8.72613e-05	7.89881e-05	NDC80/MAD2L1/CDC6/PLK1/CCNB1/CENPF/TTK/CENPE/DLGAP5/BUB1B	10
BP	GO:0008608	attachment of spindle microtubules to kinetochore	8/408	34/18866	4.95603e-07	9.49465e-05	8.59447e-05	NDC80/KNL1/NEK2/ECT2/CCNB1/CENPE/KIF2C/SGO1	8
BP	GO:0045861	negative regulation of proteolysis	25/408	369/18866	5.27766e-07	9.49465e-05	8.59447e-05	SLPI/CD109/SERPINB5/TM4SF20/SERPIND1/CPAMD8/PBK/SPP2/SERPINE2/NGF/SPINK13/COL4A3/MAGEA3/CPB2/WFDC12/SERPINA4/SERPINB4/SERPINA5/SPOCK1/RARRES1/IL1R2/SERPINB3/PI3/LRRK2/BIRC5	25
BP	GO:0030198	extracellular matrix organization	26/408	395/18866	5.41788e-07	9.49465e-05	8.59447e-05	CTSG/MFAP5/MELTF/LAMC2/SERPINB5/MFAP4/CTSV/ICAM5/LAMA3/WDR72/PRSS1/COL12A1/ADAM12/MMP10/COL4A3/CPB2/FGA/LOXL2/COL11A1/ADAMTS8/ITGA6/MMP12/TGFBI/FGB/PRSS2/GREM1	26
BP	GO:0043062	extracellular structure organization	26/408	396/18866	5.68479e-07	9.49465e-05	8.59447e-05	CTSG/MFAP5/MELTF/LAMC2/SERPINB5/MFAP4/CTSV/ICAM5/LAMA3/WDR72/PRSS1/COL12A1/ADAM12/MMP10/COL4A3/CPB2/FGA/LOXL2/COL11A1/ADAMTS8/ITGA6/MMP12/TGFBI/FGB/PRSS2/GREM1	26
BP	GO:0044784	metaphase/anaphase transition of cell cycle	10/408	60/18866	5.7604e-07	9.49465e-05	8.59447e-05	NDC80/MAD2L1/CDC6/PLK1/CCNB1/CENPF/TTK/CENPE/DLGAP5/BUB1B	10
BP	GO:0010965	regulation of mitotic sister chromatid separation	10/408	61/18866	6.75853e-07	0.000106757	9.66351e-05	NDC80/MAD2L1/CDC6/PLK1/CCNB1/CENPF/TTK/CENPE/DLGAP5/BUB1B	10
BP	GO:0051783	regulation of nuclear division	17/408	188/18866	7.413e-07	0.000112411	0.000101753	NDC80/IL1A/CDCA5/NEK2/MAD2L1/ANLN/CDC6/KIF11/PLK1/CCNB1/CENPF/TTK/CENPE/DLGAP5/CDC25C/BUB1B/MKI67	17
BP	GO:0051304	chromosome separation	12/408	94/18866	8.59718e-07	0.000125353	0.000113469	NDC80/NCAPH/MAD2L1/TOP2A/CDC6/PLK1/CCNB1/CENPF/TTK/CENPE/DLGAP5/BUB1B	12
BP	GO:0010951	negative regulation of endopeptidase activity	20/408	258/18866	9.33923e-07	0.00013113	0.000118697	SLPI/CD109/SERPINB5/SERPIND1/CPAMD8/SPP2/SERPINE2/NGF/SPINK13/COL4A3/MAGEA3/WFDC12/SERPINA4/SERPINB4/SERPINA5/SPOCK1/RARRES1/SERPINB3/PI3/BIRC5	20
BP	GO:0051306	mitotic sister chromatid separation	10/408	64/18866	1.07156e-06	0.000145082	0.000131327	NDC80/MAD2L1/CDC6/PLK1/CCNB1/CENPF/TTK/CENPE/DLGAP5/BUB1B	10
BP	GO:1905818	regulation of chromosome separation	10/408	66/18866	1.43619e-06	0.000187745	0.000169945	NDC80/MAD2L1/CDC6/PLK1/CCNB1/CENPF/TTK/CENPE/DLGAP5/BUB1B	10
BP	GO:0033045	regulation of sister chromatid segregation	11/408	84/18866	1.90648e-06	0.000240915	0.000218074	NDC80/CDCA5/MAD2L1/CDC6/PLK1/CCNB1/CENPF/TTK/CENPE/DLGAP5/BUB1B	11
BP	GO:0010466	negative regulation of peptidase activity	20/408	272/18866	2.12049e-06	0.000259315	0.00023473	SLPI/CD109/SERPINB5/SERPIND1/CPAMD8/SPP2/SERPINE2/NGF/SPINK13/COL4A3/MAGEA3/WFDC12/SERPINA4/SERPINB4/SERPINA5/SPOCK1/RARRES1/SERPINB3/PI3/BIRC5	20
BP	GO:0033047	regulation of mitotic sister chromatid segregation	10/408	72/18866	3.25242e-06	0.00038531	0.000348779	NDC80/MAD2L1/CDC6/PLK1/CCNB1/CENPF/TTK/CENPE/DLGAP5/BUB1B	10
BP	GO:0007094	mitotic spindle assembly checkpoint	7/408	34/18866	6.82598e-06	0.000718814	0.000650664	NDC80/MAD2L1/PLK1/CCNB1/CENPF/TTK/BUB1B	7
BP	GO:0031577	spindle checkpoint	7/408	34/18866	6.82598e-06	0.000718814	0.000650664	NDC80/MAD2L1/PLK1/CCNB1/CENPF/TTK/BUB1B	7
BP	GO:0071173	spindle assembly checkpoint	7/408	34/18866	6.82598e-06	0.000718814	0.000650664	NDC80/MAD2L1/PLK1/CCNB1/CENPF/TTK/BUB1B	7
BP	GO:0071174	mitotic spindle checkpoint	7/408	34/18866	6.82598e-06	0.000718814	0.000650664	NDC80/MAD2L1/PLK1/CCNB1/CENPF/TTK/BUB1B	7
BP	GO:0031639	plasminogen activation	6/408	23/18866	7.28669e-06	0.000746591	0.000675807	MELTF/SERPINE2/CPB2/FGA/CLEC3B/FGB	6
BP	GO:0016485	protein processing	17/408	223/18866	7.64504e-06	0.000762693	0.000690383	CTSG/PCSK2/MELTF/CPM/SERPINE2/NGF/CTSH/MAGEA3/CPB2/FGA/IL1R2/CGA/CLEC3B/LRRK2/FGB/PRSS3/KLK6	17
BP	GO:0050930	induction of positive chemotaxis	5/408	14/18866	7.86727e-06	0.000764739	0.000692235	SCG2/VEGFC/VEGFD/AGER/ARTN	5
BP	GO:0052548	regulation of endopeptidase activity	25/408	434/18866	9.54531e-06	0.000904657	0.000818887	SLPI/S100A9/CD109/SERPINB5/SERPIND1/CPAMD8/DLC1/SPP2/AGER/SERPINE2/NGF/S100A8/SPINK13/CTSH/COL4A3/MAGEA3/WFDC12/SERPINA4/SERPINB4/SERPINA5/SPOCK1/RARRES1/SERPINB3/PI3/BIRC5	25
BP	GO:0045841	negative regulation of mitotic metaphase/anaphase transition	7/408	36/18866	1.02044e-05	0.000936973	0.000848139	NDC80/MAD2L1/PLK1/CCNB1/CENPF/TTK/BUB1B	7
BP	GO:0090307	mitotic spindle assembly	9/408	65/18866	1.03806e-05	0.000936973	0.000848139	KIF4A/NEK2/KIF23/MYBL2/KIF11/PLK1/TPX2/PRC1/BIRC5	9
BP	GO:0000086	G2/M transition of mitotic cell cycle	18/408	254/18866	1.13597e-05	0.0010015	0.00090655	ORC1/NEK2/CCNA2/CDC6/USH1C/PLK1/HMMR/CCNB1/CENPF/CLSPN/FOXM1/CDK1/TPX2/KIF14/HMGA2/CDC25A/CDC25C/MELK	18
BP	GO:1902100	negative regulation of metaphase/anaphase transition of cell cycle	7/408	37/18866	1.23531e-05	0.00106433	0.000963426	NDC80/MAD2L1/PLK1/CCNB1/CENPF/TTK/BUB1B	7
BP	GO:0007093	mitotic cell cycle checkpoint	14/408	166/18866	1.5662e-05	0.00131943	0.00119434	NDC80/ORC1/MAD2L1/TOP2A/CDC6/PLK1/CCNB1/CENPF/CLSPN/CDK1/TTK/HMGA2/CDC25C/BUB1B	14
BP	GO:2000816	negative regulation of mitotic sister chromatid separation	7/408	39/18866	1.77802e-05	0.00146532	0.0013264	NDC80/MAD2L1/PLK1/CCNB1/CENPF/TTK/BUB1B	7
BP	GO:1905819	negative regulation of chromosome separation	7/408	40/18866	2.11543e-05	0.00170629	0.00154452	NDC80/MAD2L1/PLK1/CCNB1/CENPF/TTK/BUB1B	7
BP	GO:0002576	platelet degranulation	12/408	129/18866	2.38742e-05	0.00187158	0.00169413	PCDH7/CD109/VEGFC/TF/VEGFD/SPP2/SCG3/FGA/SERPINA4/CLEC3B/FGB/CLU	12
BP	GO:0000281	mitotic cytokinesis	9/408	72/18866	2.41908e-05	0.00187158	0.00169413	KIF4A/KIF23/ECT2/ANLN/CIT/CENPA/PLK1/CEP55/PRC1	9
BP	GO:0034508	centromere complex assembly	8/408	56/18866	2.55904e-05	0.00194026	0.00175631	KNL1/HJURP/OIP5/CENPA/CENPF/CENPE/CENPI/DLGAP5	8
BP	GO:0046942	carboxylic acid transport	21/408	350/18866	2.72211e-05	0.00202343	0.00183159	SLC47A1/SLC16A11/SLC1A7/MFSD2A/SLC13A2/FOLR1/PLA2G10/CLTRN/PLA2G12B/SLC2A1/PLA2G1B/PLA2G4F/SLC7A10/ABCC2/SLC26A9/TSPOAP1/AKR1C4/AGTR2/SLC16A1/RGS4/FABP3	21
BP	GO:0033048	negative regulation of mitotic sister chromatid segregation	7/408	42/18866	2.94932e-05	0.00213975	0.00193688	NDC80/MAD2L1/PLK1/CCNB1/CENPF/TTK/BUB1B	7
BP	GO:0044839	cell cycle G2/M phase transition	18/408	273/18866	2.99147e-05	0.00213975	0.00193688	ORC1/NEK2/CCNA2/CDC6/USH1C/PLK1/HMMR/CCNB1/CENPF/CLSPN/FOXM1/CDK1/TPX2/KIF14/HMGA2/CDC25A/CDC25C/MELK	18
BP	GO:0015849	organic acid transport	21/408	353/18866	3.08542e-05	0.00216608	0.00196072	SLC47A1/SLC16A11/SLC1A7/MFSD2A/SLC13A2/FOLR1/PLA2G10/CLTRN/PLA2G12B/SLC2A1/PLA2G1B/PLA2G4F/SLC7A10/ABCC2/SLC26A9/TSPOAP1/AKR1C4/AGTR2/SLC16A1/RGS4/FABP3	21
BP	GO:0052547	regulation of peptidase activity	25/408	466/18866	3.14994e-05	0.00217117	0.00196532	SLPI/S100A9/CD109/SERPINB5/SERPIND1/CPAMD8/DLC1/SPP2/AGER/SERPINE2/NGF/S100A8/SPINK13/CTSH/COL4A3/MAGEA3/WFDC12/SERPINA4/SERPINB4/SERPINA5/SPOCK1/RARRES1/SERPINB3/PI3/BIRC5	25
BP	GO:0031638	zymogen activation	8/408	58/18866	3.32547e-05	0.00224249	0.00202988	MELTF/SERPINE2/CTSH/CPB2/FGA/CLEC3B/FGB/PRSS3	8
BP	GO:0061844	antimicrobial humoral immune response mediated by antimicrobial peptide	9/408	75/18866	3.37172e-05	0.00224249	0.00202988	S100A9/REG1A/KRT6A/PGC/CXCL5/PLA2G1B/DEFB1/S100A7/S100A12	9
BP	GO:0033046	negative regulation of sister chromatid segregation	7/408	44/18866	4.03632e-05	0.00263822	0.00238809	NDC80/MAD2L1/PLK1/CCNB1/CENPF/TTK/BUB1B	7
BP	GO:0051985	negative regulation of chromosome segregation	7/408	45/18866	4.69182e-05	0.00301469	0.00272887	NDC80/MAD2L1/PLK1/CCNB1/CENPF/TTK/BUB1B	7
BP	GO:0051310	metaphase plate congression	8/408	61/18866	4.82847e-05	0.00305079	0.00276154	NDC80/CDCA5/FAM83D/CCNB1/CENPF/KIF14/CENPE/KIF2C	8
BP	GO:0050000	chromosome localization	9/408	79/18866	5.12074e-05	0.00313108	0.00283423	NDC80/CDCA5/FAM83D/CCNB1/CENPF/KIF14/CENPE/DLGAP5/KIF2C	9
BP	GO:0051303	establishment of chromosome localization	9/408	79/18866	5.12074e-05	0.00313108	0.00283423	NDC80/CDCA5/FAM83D/CCNB1/CENPF/KIF14/CENPE/DLGAP5/KIF2C	9
BP	GO:1901987	regulation of cell cycle phase transition	25/408	486/18866	6.22984e-05	0.00367769	0.00332901	NDC80/ORC1/CDCA5/NEK2/MAD2L1/FAM83D/ANLN/CDC6/PLK1/HMMR/CCNB1/CENPF/CLSPN/CDK6/CDK1/TPX2/KIF14/TTK/SUSD2/CENPE/HMGA2/DLGAP5/CDC25A/CDC25C/BUB1B	25
BP	GO:0030261	chromosome condensation	7/408	47/18866	6.26518e-05	0.00367769	0.00332901	CDCA5/NCAPH/TOP2A/CCNB1/CDK1/NCAPG/HMGA2	7
BP	GO:0048875	chemical homeostasis within a tissue	4/408	11/18866	6.30572e-05	0.00367769	0.00332901	ADGRF5/CTSH/SFTPD/NAPSA	4
BP	GO:0006575	cellular modified amino acid metabolic process	14/408	190/18866	6.98679e-05	0.00401317	0.00363269	CRYM/VNN1/GGTLC1/PLOD2/FOLR1/PLA2G10/GCLC/DUOXA1/PLA2G1B/GGH/DUOX1/CGA/PLA2G4F/GGT6	14
BP	GO:0051383	kinetochore organization	5/408	22/18866	8.97093e-05	0.0050013	0.00452713	NDC80/CENPA/CENPF/CENPE/DLGAP5	5
BP	GO:0071459	protein localization to chromosome, centromeric region	5/408	22/18866	8.97093e-05	0.0050013	0.00452713	NDC80/KNL1/CENPA/CDK1/TTK	5
BP	GO:0010755	regulation of plasminogen activation	4/408	12/18866	9.29729e-05	0.00510812	0.00462383	MELTF/SERPINE2/CPB2/CLEC3B	4
BP	GO:0042445	hormone metabolic process	15/408	221/18866	9.86936e-05	0.00534497	0.00483821	CRYM/CTSG/PCSK2/HSD17B6/NGF/ADH1B/DUOXA1/STC2/DUOX1/CGA/TSPOAP1/AFP/AKR1C4/AKR1B10/KLK6	15
BP	GO:0097529	myeloid leukocyte migration	15/408	222/18866	0.000103798	0.00554225	0.00501679	S100A9/SCG2/VEGFC/VEGFD/LBP/DAPK2/AGER/CXCL5/S100A8/PLA2G1B/SFTPD/MST1L/S100A7/GREM1/S100A12	15
BP	GO:0033280	response to vitamin D	6/408	36/18866	0.000110852	0.00583664	0.00528327	CYP24A1/SNAI2/STC2/AQP3/STC1/ALPL	6
BP	GO:0010389	regulation of G2/M transition of mitotic cell cycle	14/408	200/18866	0.000120913	0.00622253	0.00563257	ORC1/NEK2/CDC6/PLK1/HMMR/CCNB1/CENPF/CLSPN/CDK1/TPX2/KIF14/HMGA2/CDC25A/CDC25C	14
BP	GO:0045839	negative regulation of mitotic nuclear division	7/408	52/18866	0.000121463	0.00622253	0.00563257	NDC80/MAD2L1/PLK1/CCNB1/CENPF/TTK/BUB1B	7
BP	GO:1901990	regulation of mitotic cell cycle phase transition	23/408	448/18866	0.000125602	0.00634875	0.00574684	NDC80/ORC1/CDCA5/NEK2/MAD2L1/ANLN/CDC6/PLK1/HMMR/CCNB1/CENPF/CLSPN/CDK6/CDK1/TPX2/KIF14/TTK/CENPE/HMGA2/DLGAP5/CDC25A/CDC25C/BUB1B	23
BP	GO:0046697	decidualization	5/408	25/18866	0.000171578	0.00834535	0.00755414	CTSV/STC2/TPPP3/STC1/GJB2	5
BP	GO:0050927	positive regulation of positive chemotaxis	5/408	25/18866	0.000171578	0.00834535	0.00755414	SCG2/VEGFC/VEGFD/AGER/ARTN	5
BP	GO:0070268	cornification	10/408	113/18866	0.000171706	0.00834535	0.00755414	SPRR1B/SPRR3/KRT6A/KRT17/KRT16/KRT6B/SPRR1A/PKP2/SPRR2A/PI3	10
BP	GO:0051225	spindle assembly	10/408	115/18866	0.000198421	0.00952168	0.00861894	KIF4A/NEK2/KIF23/MYBL2/KIF11/PLK1/ASPM/TPX2/PRC1/BIRC5	10
BP	GO:0050926	regulation of positive chemotaxis	5/408	26/18866	0.000208684	0.00988903	0.00895146	SCG2/VEGFC/VEGFD/AGER/ARTN	5
BP	GO:0042742	defense response to bacterium	19/408	348/18866	0.000222793	0.0104272	0.00943865	CTSG/SLPI/S100A9/IL22RA1/DMBT1/TF/KRT6A/LBP/PGC/S100A8/WFDC12/FGA/PLA2G1B/DEFB1/SFTPD/S100A7/PI3/FGB/S100A12	19
BP	GO:0051604	protein maturation	17/408	293/18866	0.00023346	0.0107933	0.00976996	CTSG/PCSK2/MELTF/CPM/SERPINE2/NGF/CTSH/MAGEA3/CPB2/FGA/IL1R2/CGA/CLEC3B/LRRK2/FGB/PRSS3/KLK6	17
BP	GO:0051346	negative regulation of hydrolase activity	23/408	473/18866	0.000275607	0.0125883	0.0113948	SLPI/KNL1/CD109/SERPINB5/SERPIND1/CPAMD8/SPP2/SERPINE2/NGF/SPINK13/COL4A3/MAGEA3/WFDC12/SERPINA4/SERPINB4/SERPINA5/SPOCK1/RARRES1/SERPINB3/MYOZ1/PI3/LRRK2/BIRC5	23
BP	GO:1902749	regulation of cell cycle G2/M phase transition	14/408	217/18866	0.000282535	0.0127511	0.0115422	ORC1/NEK2/CDC6/PLK1/HMMR/CCNB1/CENPF/CLSPN/CDK1/TPX2/KIF14/HMGA2/CDC25A/CDC25C	14
BP	GO:0051784	negative regulation of nuclear division	7/408	60/18866	0.000302346	0.0134846	0.0122062	NDC80/MAD2L1/PLK1/CCNB1/CENPF/TTK/BUB1B	7
BP	GO:0000075	cell cycle checkpoint	14/408	219/18866	0.000310249	0.0135315	0.0122486	NDC80/ORC1/MAD2L1/TOP2A/CDC6/PLK1/CCNB1/CENPF/CLSPN/CDK1/TTK/HMGA2/CDC25C/BUB1B	14
BP	GO:0008544	epidermis development	23/408	477/18866	0.000310535	0.0135315	0.0122486	FST/LAMC2/CD109/SPRR1B/CTSV/SPRR3/LAMA3/ALOX15B/KRT6A/KRT17/KRT16/USH1C/KRT6B/SPRR1A/PTHLH/PKP2/SOX21/SPRR2A/S100A7/DKK1/PI3/AQP3/GJB5	23
BP	GO:0061640	cytoskeleton-dependent cytokinesis	9/408	100/18866	0.000317867	0.0136936	0.0123953	KIF4A/KIF23/ECT2/ANLN/CIT/CENPA/PLK1/CEP55/PRC1	9
BP	GO:0015908	fatty acid transport	9/408	101/18866	0.000342426	0.0145858	0.0132029	MFSD2A/PLA2G10/PLA2G12B/SLC2A1/PLA2G1B/PLA2G4F/ABCC2/AGTR2/FABP3	9
BP	GO:0051302	regulation of cell division	12/408	171/18866	0.000356393	0.0150121	0.0135888	IL1A/VEGFC/KIF23/ECT2/CIT/VEGFD/CDC6/PLK1/ASPM/KIF14/SUSD2/PRC1	12
BP	GO:0051384	response to glucocorticoid	11/408	147/18866	0.000360723	0.0150275	0.0136027	CTSV/CPS1/FOSB/FOSL1/ABCC2/ABCA3/AGTR2/SCGB1A1/STC1/ALPL/GJB2	11
BP	GO:0051216	cartilage development	13/408	197/18866	0.000372351	0.0153433	0.0138886	PITX1/CHRDL2/SNAI2/RFLNA/PAX7/PTHLH/LOXL2/COL11A1/FGFR3/HMGA2/TGFBI/GREM1/STC1	13
BP	GO:0022617	extracellular matrix disassembly	8/408	82/18866	0.00039403	0.016062	0.0145392	CTSG/MELTF/CTSV/WDR72/PRSS1/MMP10/MMP12/PRSS2	8
BP	GO:0051382	kinetochore assembly	4/408	17/18866	0.000410262	0.01651	0.0149447	CENPA/CENPF/CENPE/DLGAP5	4
BP	GO:0015718	monocarboxylic acid transport	12/408	174/18866	0.000417338	0.01651	0.0149447	SLC16A11/MFSD2A/PLA2G10/PLA2G12B/SLC2A1/PLA2G1B/PLA2G4F/ABCC2/AKR1C4/AGTR2/SLC16A1/FABP3	12
BP	GO:0010038	response to metal ion	19/408	366/18866	0.000418084	0.01651	0.0149447	IL1A/TESMIN/TF/ECT2/CPS1/GCLC/S100A8/FOSB/CCNB1/FGA/GGH/LOXL2/TNNC1/CDK1/ABCC2/LRRK2/TFF1/AQP3/FGB	19
BP	GO:0007080	mitotic metaphase plate congression	6/408	47/18866	0.000500218	0.0195498	0.0176963	NDC80/CDCA5/CCNB1/KIF14/CENPE/KIF2C	6
BP	GO:0034501	protein localization to kinetochore	4/408	18/18866	0.000518523	0.0200584	0.0181567	NDC80/KNL1/CDK1/TTK	4
BP	GO:0061351	neural precursor cell proliferation	11/408	154/18866	0.000535681	0.0205128	0.018568	HHIP/CIP2A/CDH2/VEGFC/KIF1A/ASPM/ARTN/KIF14/LRRK2/IGF2BP1/MELK	11
BP	GO:0030595	leukocyte chemotaxis	14/408	232/18866	0.000553649	0.0209888	0.0189989	S100A9/SCG2/VEGFC/VEGFD/LBP/DAPK2/CXCL5/S100A8/PLA2G1B/SFTPD/MST1L/S100A7/GREM1/S100A12	14
BP	GO:0002062	chondrocyte differentiation	9/408	108/18866	0.0005619	0.0210907	0.0190911	SNAI2/RFLNA/PTHLH/LOXL2/COL11A1/FGFR3/HMGA2/TGFBI/GREM1	9
BP	GO:0044818	mitotic G2/M transition checkpoint	5/408	32/18866	0.0005743	0.0213448	0.0193211	ORC1/CDC6/CLSPN/CDK1/HMGA2	5
BP	GO:0051781	positive regulation of cell division	8/408	87/18866	0.000588324	0.0216537	0.0196008	IL1A/VEGFC/KIF23/ECT2/CIT/VEGFD/CDC6/KIF14	8
BP	GO:0070613	regulation of protein processing	7/408	67/18866	0.000598209	0.0218059	0.0197385	MELTF/SERPINE2/MAGEA3/CPB2/IL1R2/CLEC3B/LRRK2	7
BP	GO:0010955	negative regulation of protein processing	5/408	33/18866	0.000664964	0.0237819	0.0215271	SERPINE2/MAGEA3/CPB2/IL1R2/LRRK2	5
BP	GO:1903318	negative regulation of protein maturation	5/408	33/18866	0.000664964	0.0237819	0.0215271	SERPINE2/MAGEA3/CPB2/IL1R2/LRRK2	5
BP	GO:0071715	icosanoid transport	6/408	50/18866	0.000701054	0.0246083	0.0222752	PLA2G10/PLA2G12B/PLA2G1B/PLA2G4F/ABCC2/AGTR2	6
BP	GO:1901571	fatty acid derivative transport	6/408	50/18866	0.000701054	0.0246083	0.0222752	PLA2G10/PLA2G12B/PLA2G1B/PLA2G4F/ABCC2/AGTR2	6
BP	GO:1903317	regulation of protein maturation	7/408	69/18866	0.000715259	0.0248766	0.022518	MELTF/SERPINE2/MAGEA3/CPB2/IL1R2/CLEC3B/LRRK2	7
BP	GO:0033273	response to vitamin	8/408	91/18866	0.000794055	0.0272685	0.0246832	CYP24A1/FOLR1/SNAI2/STC2/KYNU/AQP3/STC1/ALPL	8
BP	GO:0033044	regulation of chromosome organization	18/408	356/18866	0.000798419	0.0272685	0.0246832	NDC80/CDCA5/NEK2/MAD2L1/SNAI2/PKIB/TOP2A/CDC6/PLK1/CCNB1/CENPF/PAX7/LRRK2/TTK/CENPE/DLGAP5/BUB1B/MKI67	18
BP	GO:1901988	negative regulation of cell cycle phase transition	15/408	270/18866	0.00083781	0.0283584	0.0256698	NDC80/ORC1/MAD2L1/CDC6/PLK1/CCNB1/CENPF/CLSPN/CDK6/CDK1/TTK/SUSD2/HMGA2/CDC25C/BUB1B	15
BP	GO:0010948	negative regulation of cell cycle process	18/408	359/18866	0.000878875	0.0294851	0.0266896	NDC80/ORC1/NEK2/MAD2L1/CDC6/PLK1/CCNB1/CENPF/CLSPN/CDK6/CDK1/TTK/SUSD2/HMGA2/RRM2/CDC25C/BUB1B/RAD51	18
BP	GO:0031960	response to corticosteroid	11/408	164/18866	0.000904179	0.0300679	0.0272172	CTSV/CPS1/FOSB/FOSL1/ABCC2/ABCA3/AGTR2/SCGB1A1/STC1/ALPL/GJB2	11
BP	GO:0090068	positive regulation of cell cycle process	16/408	302/18866	0.000943842	0.0311139	0.0281641	NDC80/IL1A/CDCA5/KIF23/MAD2L1/FAM83D/ECT2/CIT/CDC6/CCNB1/CDK1/KIF14/HMGA2/DLGAP5/CDC25A/CDC25C	16
BP	GO:0006869	lipid transport	19/408	393/18866	0.000983597	0.032145	0.0290973	CEL/MFSD2A/PLA2G10/LBP/PLA2G12B/SLC2A1/PLA2G1B/SERPINA5/RETN/GRAMD1B/SFTPA1/ESYT3/PLA2G4F/ABCC2/ABCA3/AKR1C4/AGTR2/CLU/FABP3	19
BP	GO:0001893	maternal placenta development	5/408	36/18866	0.00100162	0.0324541	0.0293772	CTSV/STC2/TPPP3/STC1/GJB2	5
BP	GO:0043588	skin development	20/408	425/18866	0.00101578	0.0326339	0.02954	FST/CD109/SPRR1B/CTSV/SPRR3/ALOX15B/GJB3/KRT6A/KRT17/KRT16/KRT6B/SPRR1A/PKP2/SOX21/SPRR2A/S100A7/ITGA6/DKK1/PI3/AQP3	20
BP	GO:0033314	mitotic DNA replication checkpoint	3/408	10/18866	0.00107596	0.0337105	0.0305144	ORC1/CDC6/CLSPN	3
BP	GO:0051231	spindle elongation	3/408	10/18866	0.00107596	0.0337105	0.0305144	KIF4A/KIF23/PRC1	3
BP	GO:0070327	thyroid hormone transport	3/408	10/18866	0.00107596	0.0337105	0.0305144	CRYM/SLCO4A1/ABCC2	3
BP	GO:0015909	long-chain fatty acid transport	7/408	75/18866	0.00117813	0.0364612	0.0330043	MFSD2A/PLA2G10/PLA2G12B/SLC2A1/PLA2G1B/PLA2G4F/FABP3	7
BP	GO:1901991	negative regulation of mitotic cell cycle phase transition	14/408	251/18866	0.00118929	0.0364612	0.0330043	NDC80/ORC1/MAD2L1/CDC6/PLK1/CCNB1/CENPF/CLSPN/CDK6/CDK1/TTK/HMGA2/CDC25C/BUB1B	14
BP	GO:0007565	female pregnancy	12/408	196/18866	0.00119261	0.0364612	0.0330043	CTSV/CLIC5/SLC2A1/FOSB/STC2/PTHLH/FOSL1/ABCC2/TPPP3/SCGB1A1/STC1/GJB2	12
BP	GO:0000910	cytokinesis	11/408	172/18866	0.00133191	0.0401705	0.036362	KIF4A/KIF23/ECT2/ANLN/CIT/CENPA/CDC6/PLK1/KIF14/CEP55/PRC1	11
BP	GO:0044706	multi-multicellular organism process	13/408	226/18866	0.00133655	0.0401705	0.036362	CTSV/SERPINE2/CLIC5/SLC2A1/FOSB/STC2/PTHLH/FOSL1/ABCC2/TPPP3/SCGB1A1/STC1/GJB2	13
BP	GO:0006690	icosanoid metabolic process	9/408	122/18866	0.00134573	0.0401705	0.036362	CYP4F3/GGTLC1/ALOX15B/PLA2G10/EPHX1/PLA2G1B/PLA2G4F/GGT6/AKR1C4	9
BP	GO:0061045	negative regulation of wound healing	7/408	78/18866	0.00148394	0.04395	0.0397832	CD109/TSPAN8/AGER/SERPINE2/CPB2/FGA/FGB	7
BP	GO:0010001	glial cell differentiation	13/408	230/18866	0.00156407	0.0459642	0.0416063	S100A9/CDH2/DNER/KLF15/NKX2-1/TPPP/AGER/SERPINE2/S100A8/CDK6/CDK1/CSPG5/CLU	13
BP	GO:1905039	carboxylic acid transmembrane transport	10/408	150/18866	0.00159989	0.0466552	0.0422319	SLC47A1/SLC16A11/SLC1A7/SLC13A2/FOLR1/CLTRN/SLC2A1/SLC7A10/SLC16A1/RGS4	10
BP	GO:0032331	negative regulation of chondrocyte differentiation	4/408	24/18866	0.00162521	0.0467829	0.0423475	SNAI2/RFLNA/PTHLH/GREM1	4
BP	GO:0032467	positive regulation of cytokinesis	5/408	40/18866	0.00162895	0.0467829	0.0423475	KIF23/ECT2/CIT/CDC6/KIF14	5
BP	GO:0048608	reproductive structure development	20/408	443/18866	0.00166627	0.0474949	0.0429919	FST/TCF21/SERPINB5/CTSV/ALOX15B/GJB3/NKX2-1/SERPINE2/ASPM/DLX3/SERPINA5/STC2/RETN/FOSL1/RSPO3/GJB5/AFP/TPPP3/STC1/GJB2	20
BP	GO:1903825	organic acid transmembrane transport	10/408	151/18866	0.00168119	0.0475625	0.0430532	SLC47A1/SLC16A11/SLC1A7/SLC13A2/FOLR1/CLTRN/SLC2A1/SLC7A10/SLC16A1/RGS4	10
BP	GO:0071621	granulocyte chemotaxis	9/408	127/18866	0.00177991	0.0499826	0.0452438	S100A9/SCG2/LBP/DAPK2/CXCL5/S100A8/PLA2G1B/S100A7/S100A12	9
BP	GO:0061458	reproductive system development	20/408	447/18866	0.0018512	0.0516021	0.0467098	FST/TCF21/SERPINB5/CTSV/ALOX15B/GJB3/NKX2-1/SERPINE2/ASPM/DLX3/SERPINA5/STC2/RETN/FOSL1/RSPO3/GJB5/AFP/TPPP3/STC1/GJB2	20
BP	GO:0007077	mitotic nuclear envelope disassembly	3/408	12/18866	0.00191008	0.0520942	0.0471552	PLK1/CCNB1/CDK1	3
BP	GO:0031581	hemidesmosome assembly	3/408	12/18866	0.00191008	0.0520942	0.0471552	LAMC2/LAMA3/ITGA6	3
BP	GO:0051255	spindle midzone assembly	3/408	12/18866	0.00191008	0.0520942	0.0471552	KIF4A/KIF23/PRC1	3
BP	GO:0002237	response to molecule of bacterial origin	17/408	356/18866	0.00203333	0.0550598	0.0498396	CTSG/SLPI/S100A9/IL1A/DMBT1/IL37/CPS1/LBP/CXCL5/AKAP12/S100A8/PALM3/S100A7/ABCC2/SCGB1A1/ALPL/GJB2	17
BP	GO:0001890	placenta development	10/408	156/18866	0.00213938	0.0575206	0.0520671	CTSV/GJB3/DLX3/STC2/FOSL1/RSPO3/GJB5/TPPP3/STC1/GJB2	10
BP	GO:0006766	vitamin metabolic process	9/408	131/18866	0.00220244	0.0585876	0.053033	VNN1/CYP24A1/CYP4F3/FOLR1/SNAI2/PRSS1/GCLC/SLC2A1/PRSS3	9
BP	GO:0042403	thyroid hormone metabolic process	4/408	26/18866	0.00220998	0.0585876	0.053033	CRYM/DUOXA1/DUOX1/CGA	4
BP	GO:0034080	CENP-A containing nucleosome assembly	5/408	43/18866	0.0022602	0.0590924	0.05349	KNL1/HJURP/OIP5/CENPA/CENPI	5
BP	GO:0061641	CENP-A containing chromatin organization	5/408	43/18866	0.0022602	0.0590924	0.05349	KNL1/HJURP/OIP5/CENPA/CENPI	5
BP	GO:0044774	mitotic DNA integrity checkpoint	8/408	108/18866	0.0023963	0.0621698	0.0562755	ORC1/TOP2A/CDC6/CCNB1/CLSPN/CDK1/HMGA2/CDC25C	8
BP	GO:0034502	protein localization to chromosome	7/408	85/18866	0.00243796	0.0621698	0.0562755	NDC80/KNL1/CDCA5/CENPA/PLK1/CDK1/TTK	7
BP	GO:0008228	opsonization	3/408	13/18866	0.0024435	0.0621698	0.0562755	LBP/C4BPA/SFTPA1	3
BP	GO:0051988	regulation of attachment of spindle microtubules to kinetochore	3/408	13/18866	0.0024435	0.0621698	0.0562755	NEK2/ECT2/CCNB1	3
BP	GO:0010971	positive regulation of G2/M transition of mitotic cell cycle	4/408	27/18866	0.00255057	0.0640344	0.0579634	CCNB1/CDK1/CDC25A/CDC25C	4
BP	GO:0034698	response to gonadotropin	4/408	27/18866	0.00255057	0.0640344	0.0579634	CTSV/CCNA2/GCLC/GJB2	4
BP	GO:0032496	response to lipopolysaccharide	16/408	334/18866	0.00263837	0.0658031	0.0595643	CTSG/SLPI/S100A9/IL1A/IL37/CPS1/LBP/CXCL5/AKAP12/S100A8/PALM3/S100A7/ABCC2/SCGB1A1/ALPL/GJB2	16
BP	GO:0042493	response to drug	18/408	397/18866	0.00266694	0.0660809	0.0598158	VEGFC/AK4/CPS1/CYP4B1/FOSB/CPB2/CCNB1/CENPF/GGH/FOSL1/CDK1/CA9/ABCC2/HMGA2/ABCA3/SCGB1A1/RAD51/FABP3	18
BP	GO:1901989	positive regulation of cell cycle phase transition	8/408	110/18866	0.00268722	0.066151	0.0598793	CDCA5/FAM83D/CDC6/CCNB1/CDK1/DLGAP5/CDC25A/CDC25C	8
BP	GO:0030216	keratinocyte differentiation	15/408	306/18866	0.00285521	0.0698329	0.0632121	CD109/SPRR1B/CTSV/SPRR3/ALOX15B/KRT6A/KRT17/KRT16/KRT6B/SPRR1A/PKP2/SPRR2A/S100A7/PI3/AQP3	15
BP	GO:0051656	establishment of organelle localization	19/408	432/18866	0.0028798	0.0699829	0.0633479	NDC80/CDCA5/KIF23/MAD2L1/FAM83D/FOLR1/NEFH/CENPA/PLK1/SYBU/KIF1A/CCNB1/CENPF/KIF14/LRRK2/CENPE/DLGAP5/KIF2C/CPLX2	19
BP	GO:0007585	respiratory gaseous exchange by respiratory system	6/408	66/18866	0.00300177	0.0716162	0.0648264	SFTPB/TNNC1/SFTPD/SFTPA1/SFTPC/SFTPA2	6
BP	GO:0032309	icosanoid secretion	5/408	46/18866	0.00305298	0.0716162	0.0648264	PLA2G10/PLA2G12B/PLA2G1B/PLA2G4F/AGTR2	5
BP	GO:0035987	endodermal cell differentiation	5/408	46/18866	0.00305298	0.0716162	0.0648264	LAMA3/COL12A1/COL11A1/DKK1/HMGA2	5
BP	GO:0090231	regulation of spindle checkpoint	3/408	14/18866	0.00306036	0.0716162	0.0648264	NDC80/MAD2L1/CCNB1	3
BP	GO:0090266	regulation of mitotic cell cycle spindle assembly checkpoint	3/408	14/18866	0.00306036	0.0716162	0.0648264	NDC80/MAD2L1/CCNB1	3
BP	GO:1903504	regulation of mitotic spindle checkpoint	3/408	14/18866	0.00306036	0.0716162	0.0648264	NDC80/MAD2L1/CCNB1	3
BP	GO:0045930	negative regulation of mitotic cell cycle	16/408	341/18866	0.00323378	0.0752102	0.0680796	NDC80/ORC1/MAD2L1/TOP2A/CDC6/PLK1/CCNB1/CENPF/CLSPN/CDK6/CDK1/TTK/HMGA2/CDC25C/BUB1B/DDIAS	16
BP	GO:0031055	chromatin remodeling at centromere	5/408	47/18866	0.00335688	0.0773643	0.0700294	KNL1/HJURP/OIP5/CENPA/CENPI	5
BP	GO:0032465	regulation of cytokinesis	7/408	90/18866	0.00336721	0.0773643	0.0700294	KIF23/ECT2/CIT/CDC6/PLK1/KIF14/PRC1	7
BP	GO:0010876	lipid localization	19/408	440/18866	0.00351598	0.0802956	0.0726828	CEL/MFSD2A/PLA2G10/LBP/PLA2G12B/SLC2A1/PLA2G1B/SERPINA5/RETN/GRAMD1B/SFTPA1/ESYT3/PLA2G4F/ABCC2/ABCA3/AKR1C4/AGTR2/CLU/FABP3	19
BP	GO:0007586	digestion	9/408	141/18866	0.0036126	0.0820082	0.0742331	CEL/PRSS1/CHIA/PGC/TFF2/MUC13/TFF1/PRSS2/PRSS3	9
BP	GO:0045931	positive regulation of mitotic cell cycle	10/408	168/18866	0.00365521	0.0824816	0.0746616	NDC80/IL1A/CDCA5/MAD2L1/CDC6/CCNB1/CDK1/DLGAP5/CDC25A/CDC25C	10
BP	GO:0051315	attachment of mitotic spindle microtubules to kinetochore	3/408	15/18866	0.00376458	0.083911	0.0759555	NDC80/CENPE/KIF2C	3
BP	GO:0000132	establishment of mitotic spindle orientation	4/408	30/18866	0.00378496	0.083911	0.0759555	NDC80/MAD2L1/CENPA/PLK1	4
BP	GO:1902751	positive regulation of cell cycle G2/M phase transition	4/408	30/18866	0.00378496	0.083911	0.0759555	CCNB1/CDK1/CDC25A/CDC25C	4
BP	GO:1903035	negative regulation of response to wounding	7/408	93/18866	0.00404151	0.0890777	0.0806323	CD109/TSPAN8/AGER/SERPINE2/CPB2/FGA/FGB	7
BP	GO:0007584	response to nutrient	10/408	171/18866	0.00414293	0.0907852	0.0821779	CYP24A1/FOLR1/SNAI2/GCLC/STC2/KYNU/AQP3/SLC16A1/STC1/ALPL	10
BP	GO:0007568	aging	15/408	319/18866	0.00420403	0.0915947	0.0829107	CTSV/IGFBP1/AGER/KRT16/GCLC/RETN/FOXM1/LOXL2/CDK6/CDK1/DKK1/KYNU/LRRK2/HMGA2/GJB2	15
BP	GO:0007143	female meiotic nuclear division	4/408	31/18866	0.00427262	0.0918314	0.0831249	NCAPH/TOP2A/PLK1/TTK	4
BP	GO:0061037	negative regulation of cartilage development	4/408	31/18866	0.00427262	0.0918314	0.0831249	SNAI2/RFLNA/PTHLH/GREM1	4
BP	GO:1901992	positive regulation of mitotic cell cycle phase transition	7/408	94/18866	0.00428756	0.0918314	0.0831249	CDCA5/CDC6/CCNB1/CDK1/DLGAP5/CDC25A/CDC25C	7
BP	GO:0030195	negative regulation of blood coagulation	5/408	50/18866	0.00439872	0.0921302	0.0833954	TSPAN8/SERPINE2/CPB2/FGA/FGB	5
BP	GO:0045104	intermediate filament cytoskeleton organization	5/408	50/18866	0.00439872	0.0921302	0.0833954	INA/KRT17/KRT16/NEFH/PKP2	5
BP	GO:0050873	brown fat cell differentiation	5/408	50/18866	0.00439872	0.0921302	0.0833954	ADRB1/PRDM16/FNDC5/ITGA6/FABP3	5
BP	GO:0051653	spindle localization	5/408	50/18866	0.00439872	0.0921302	0.0833954	NDC80/MAD2L1/CENPA/PLK1/ASPM	5
BP	GO:0002523	leukocyte migration involved in inflammatory response	3/408	16/18866	0.00455967	0.092437	0.0836731	S100A9/LBP/S100A8	3
BP	GO:0007076	mitotic chromosome condensation	3/408	16/18866	0.00455967	0.092437	0.0836731	CDCA5/NCAPH/NCAPG	3
BP	GO:0030397	membrane disassembly	3/408	16/18866	0.00455967	0.092437	0.0836731	PLK1/CCNB1/CDK1	3
BP	GO:0034116	positive regulation of heterotypic cell-cell adhesion	3/408	16/18866	0.00455967	0.092437	0.0836731	AGER/FGA/FGB	3
BP	GO:0051081	nuclear envelope disassembly	3/408	16/18866	0.00455967	0.092437	0.0836731	PLK1/CCNB1/CDK1	3
BP	GO:0051238	sequestering of metal ion	3/408	16/18866	0.00455967	0.092437	0.0836731	S100A9/S100A8/S100A7	3
BP	GO:0045103	intermediate filament-based process	5/408	51/18866	0.00479203	0.0943027	0.0853619	INA/KRT17/KRT16/NEFH/PKP2	5
BP	GO:0048146	positive regulation of fibroblast proliferation	5/408	51/18866	0.00479203	0.0943027	0.0853619	CCNA2/CDC6/CCNB1/PLA2G1B/CDK6	5
BP	GO:1900047	negative regulation of hemostasis	5/408	51/18866	0.00479203	0.0943027	0.0853619	TSPAN8/SERPINE2/CPB2/FGA/FGB	5
BP	GO:0061448	connective tissue development	13/408	262/18866	0.00479863	0.0943027	0.0853619	PITX1/CHRDL2/SNAI2/RFLNA/PAX7/PTHLH/LOXL2/COL11A1/FGFR3/HMGA2/TGFBI/GREM1/STC1	13
BP	GO:0050482	arachidonic acid secretion	4/408	32/18866	0.00480095	0.0943027	0.0853619	PLA2G10/PLA2G12B/PLA2G1B/PLA2G4F	4
BP	GO:1903963	arachidonate transport	4/408	32/18866	0.00480095	0.0943027	0.0853619	PLA2G10/PLA2G12B/PLA2G1B/PLA2G4F	4
BP	GO:2001234	negative regulation of apoptotic signaling pathway	12/408	233/18866	0.00494453	0.0966223	0.0874616	VNN1/SCG2/IL1A/SNAI2/GCLC/MAGEA3/FGA/ITGA6/LRRK2/FGB/CLU/DDIAS	12
BP	GO:0014706	striated muscle tissue development	17/408	389/18866	0.00499084	0.097027	0.0878279	POPDC3/PITX1/TCF21/DNER/HLF/CCNB1/CENPF/PAX7/TNNC1/COL11A1/PKP2/MYOZ1/CDK1/DKK1/GREM1/AGTR2/RGS4	17
BP	GO:0051146	striated muscle cell differentiation	14/408	295/18866	0.00516011	0.099806	0.0903434	POPDC3/CDH2/DNER/CACNA2D2/FLNC/SCGB3A1/ADAM12/CCNB1/MYOZ1/CDK1/DKK1/GREM1/AGTR2/RGS4	14
BP	GO:0032330	regulation of chondrocyte differentiation	5/408	52/18866	0.00520968	0.100253	0.0907484	SNAI2/RFLNA/PTHLH/LOXL2/GREM1	5
BP	GO:0097530	granulocyte migration	9/408	150/18866	0.00541338	0.103647	0.0938205	S100A9/SCG2/LBP/DAPK2/CXCL5/S100A8/PLA2G1B/S100A7/S100A12	9
BP	GO:0000076	DNA replication checkpoint	3/408	17/18866	0.00544883	0.103802	0.0939603	ORC1/CDC6/CLSPN	3
BP	GO:0006336	DNA replication-independent nucleosome assembly	5/408	53/18866	0.00565244	0.106609	0.0965014	KNL1/HJURP/OIP5/CENPA/CENPI	5
BP	GO:1900024	regulation of substrate adhesion-dependent cell spreading	5/408	53/18866	0.00565244	0.106609	0.0965014	MELTF/FGA/CSPG5/OLFM4/FGB	5
BP	GO:0045787	positive regulation of cell cycle	17/408	396/18866	0.00593656	0.111413	0.10085	NDC80/IL1A/CDCA5/KIF23/MAD2L1/FAM83D/ECT2/CIT/CDC6/CCNB1/FOSL1/CDK1/KIF14/HMGA2/DLGAP5/CDC25A/CDC25C	17
BP	GO:2000352	negative regulation of endothelial cell apoptotic process	4/408	34/18866	0.0059855	0.111779	0.101181	SCG2/MIR126/FGA/FGB	4
BP	GO:0034724	DNA replication-independent nucleosome organization	5/408	54/18866	0.00612108	0.11375	0.102965	KNL1/HJURP/OIP5/CENPA/CENPI	5
BP	GO:0009913	epidermal cell differentiation	16/408	365/18866	0.0061735	0.114165	0.103341	CD109/SPRR1B/CTSV/SPRR3/ALOX15B/KRT6A/KRT17/KRT16/USH1C/KRT6B/SPRR1A/PKP2/SPRR2A/S100A7/PI3/AQP3	16
BP	GO:0006323	DNA packaging	12/408	240/18866	0.00622451	0.114549	0.103689	KNL1/HJURP/CDCA5/NCAPH/TOP2A/OIP5/CENPA/CCNB1/CDK1/NCAPG/CENPI/HMGA2	12
BP	GO:0036148	phosphatidylglycerol acyl-chain remodeling	3/408	18/18866	0.00643489	0.116239	0.105219	PLA2G10/PLA2G1B/PLA2G4F	3
BP	GO:0036149	phosphatidylinositol acyl-chain remodeling	3/408	18/18866	0.00643489	0.116239	0.105219	PLA2G10/PLA2G1B/PLA2G4F	3
BP	GO:0072079	nephron tubule formation	3/408	18/18866	0.00643489	0.116239	0.105219	IRX3/IRX1/GREM1	3
BP	GO:0001706	endoderm formation	5/408	55/18866	0.00661637	0.116239	0.105219	LAMA3/COL12A1/COL11A1/DKK1/HMGA2	5
BP	GO:0050819	negative regulation of coagulation	5/408	55/18866	0.00661637	0.116239	0.105219	TSPAN8/SERPINE2/CPB2/FGA/FGB	5
BP	GO:0006691	leukotriene metabolic process	4/408	35/18866	0.00664455	0.116239	0.105219	CYP4F3/GGTLC1/PLA2G1B/GGT6	4
BP	GO:0016486	peptide hormone processing	4/408	35/18866	0.00664455	0.116239	0.105219	CTSG/PCSK2/NGF/CGA	4
BP	GO:0040001	establishment of mitotic spindle localization	4/408	35/18866	0.00664455	0.116239	0.105219	NDC80/MAD2L1/CENPA/PLK1	4
BP	GO:0140448	signaling receptor ligand precursor processing	4/408	35/18866	0.00664455	0.116239	0.105219	CTSG/PCSK2/NGF/CGA	4
BP	GO:0007018	microtubule-based movement	16/408	368/18866	0.00665853	0.116239	0.105219	CFAP221/KIF4A/KIF23/CFAP157/NEFH/KIF11/SYBU/KIF1A/CFAP73/AQP4/DEFB1/KIF14/CENPE/DLGAP5/KIF2C/TEKT1	16
BP	GO:0034329	cell junction assembly	18/408	434/18866	0.00666814	0.116239	0.105219	CLDN2/LAMC2/CEL/CDH2/DNER/LAMA3/ECT2/FLNC/SNAI2/GPC6/CLDN8/DLC1/PKP2/CDHR3/ITGA6/DKK1/GREM1/GJB2	18
BP	GO:0000079	regulation of cyclin-dependent protein serine/threonine kinase activity	7/408	102/18866	0.00668429	0.116239	0.105219	CCNA2/CDC6/PLK1/CCNB1/CDKN3/CDC25A/CDC25C	7
BP	GO:0030593	neutrophil chemotaxis	7/408	103/18866	0.00704217	0.121904	0.110346	S100A9/LBP/DAPK2/CXCL5/S100A8/PLA2G1B/S100A12	7
BP	GO:0007492	endoderm development	6/408	79/18866	0.00727124	0.124949	0.113102	LAMA3/NKX2-1/COL12A1/COL11A1/DKK1/HMGA2	6
BP	GO:0031572	G2 DNA damage checkpoint	4/408	36/18866	0.00734991	0.124949	0.113102	PLK1/CLSPN/CDK1/HMGA2	4
BP	GO:0033762	response to glucagon	4/408	36/18866	0.00734991	0.124949	0.113102	CPS1/CCNA2/ABCC2/GJB2	4
BP	GO:0051294	establishment of spindle orientation	4/408	36/18866	0.00734991	0.124949	0.113102	NDC80/MAD2L1/CENPA/PLK1	4
BP	GO:0035988	chondrocyte proliferation	3/408	19/18866	0.00752038	0.127276	0.115209	FGFR3/HMGA2/STC1	3
BP	GO:0010810	regulation of cell-substrate adhesion	11/408	217/18866	0.00781688	0.131706	0.119219	MELTF/DLC1/FGA/SPOCK1/CDK6/CSPG5/ITGA6/OLFM4/MMP12/FGB/GREM1	11
BP	GO:0044843	cell cycle G1/S phase transition	14/408	310/18866	0.0078631	0.131898	0.119393	ORC1/FAM83D/CCNA2/CDC6/CCNB1/MCM10/CDK6/CDK1/KIF14/SUSD2/RRM2/CDKN3/CDC25A/CDC25C	14
BP	GO:0060326	cell chemotaxis	14/408	311/18866	0.00807707	0.13431	0.121576	S100A9/SCG2/VEGFC/VEGFD/LBP/DAPK2/CXCL5/S100A8/PLA2G1B/SFTPD/MST1L/S100A7/GREM1/S100A12	14
BP	GO:0060537	muscle tissue development	17/408	409/18866	0.00807771	0.13431	0.121576	POPDC3/PITX1/TCF21/DNER/HLF/CCNB1/CENPF/PAX7/TNNC1/COL11A1/PKP2/MYOZ1/CDK1/DKK1/GREM1/AGTR2/RGS4	17
BP	GO:0050829	defense response to Gram-negative bacterium	6/408	81/18866	0.00819118	0.135177	0.122361	CTSG/IL22RA1/DMBT1/LBP/DEFB1/S100A7	6
BP	GO:1904029	regulation of cyclin-dependent protein kinase activity	7/408	106/18866	0.00820118	0.135177	0.122361	CCNA2/CDC6/PLK1/CCNB1/CDKN3/CDC25A/CDC25C	7
BP	GO:0031570	DNA integrity checkpoint	9/408	161/18866	0.00847886	0.139149	0.125956	ORC1/TOP2A/CDC6/PLK1/CCNB1/CLSPN/CDK1/HMGA2/CDC25C	9
BP	GO:0003018	vascular process in circulatory system	10/408	190/18866	0.00853806	0.139516	0.126289	ADRB1/MFSD2A/CPS1/GCLC/AKAP12/FGA/HTR1D/ABCC2/FGB/AGTR2	10
BP	GO:2001237	negative regulation of extrinsic apoptotic signaling pathway	7/408	107/18866	0.00861704	0.140203	0.12691	SCG2/IL1A/SNAI2/GCLC/FGA/ITGA6/FGB	7
BP	GO:0002544	chronic inflammatory response	3/408	20/18866	0.00870749	0.140469	0.127151	VNN1/S100A9/S100A8	3
BP	GO:0045056	transcytosis	3/408	20/18866	0.00870749	0.140469	0.127151	MFSD2A/AGER/GPIHBP1	3
BP	GO:2001233	regulation of apoptotic signaling pathway	17/408	413/18866	0.00884888	0.141246	0.127855	VNN1/S100A9/SCG2/IL1A/SNAI2/DAPK2/GCLC/S100A8/CTSH/MAGEA3/FGA/ITGA6/LRRK2/FGB/AGTR2/CLU/DDIAS	17
BP	GO:0043486	histone exchange	5/408	59/18866	0.00887894	0.141246	0.127855	KNL1/HJURP/OIP5/CENPA/CENPI	5
BP	GO:0046456	icosanoid biosynthetic process	5/408	59/18866	0.00887894	0.141246	0.127855	GGTLC1/ALOX15B/PLA2G1B/PLA2G4F/GGT6	5
BP	GO:1900026	positive regulation of substrate adhesion-dependent cell spreading	4/408	38/18866	0.00890473	0.141246	0.127855	FGA/CSPG5/OLFM4/FGB	4
BP	GO:0098656	anion transmembrane transport	14/408	315/18866	0.00897955	0.141839	0.128392	SLC47A1/SLC16A11/SLC1A7/CLIC3/SLC13A2/FOLR1/CLTRN/CLIC5/SLC2A1/ADAMTS8/SLC7A10/SLC26A9/SLC16A1/RGS4	14
BP	GO:0048145	regulation of fibroblast proliferation	6/408	83/18866	0.0091919	0.144591	0.130883	CCNA2/CDC6/CCNB1/PLA2G1B/CDK6/AGTR2	6
BP	GO:1903046	meiotic cell cycle process	10/408	193/18866	0.00947506	0.14843	0.134357	NCAPH/TOP2A/PLK1/ASPM/TTK/CDC25A/CDC25C/BUB1B/RAD51/SGO1	10
BP	GO:0031023	microtubule organizing center organization	8/408	136/18866	0.0095424	0.148583	0.134496	NDC80/CCDC78/NEK2/KIF11/PLK1/CDK1/SLC16A1/SGO1	8
BP	GO:0051321	meiotic cell cycle	12/408	254/18866	0.00956321	0.148583	0.134496	EXO1/NEK2/NCAPH/TOP2A/PLK1/ASPM/TTK/CDC25A/CDC25C/BUB1B/RAD51/SGO1	12
BP	GO:0030279	negative regulation of ossification	6/408	84/18866	0.00972369	0.149746	0.135549	VEGFC/GDF10/RFLNA/CDK6/DKK1/GREM1	6
BP	GO:0048144	fibroblast proliferation	6/408	84/18866	0.00972369	0.149746	0.135549	CCNA2/CDC6/CCNB1/PLA2G1B/CDK6/AGTR2	6
BP	GO:0032506	cytokinetic process	4/408	39/18866	0.00975662	0.149746	0.135549	KIF23/ECT2/ANLN/CEP55	4
BP	GO:0006833	water transport	3/408	21/18866	0.00999817	0.151008	0.136691	AQP4/AQP3/AQP7	3
BP	GO:0019370	leukotriene biosynthetic process	3/408	21/18866	0.00999817	0.151008	0.136691	GGTLC1/PLA2G1B/GGT6	3
BP	GO:0030277	maintenance of gastrointestinal epithelium	3/408	21/18866	0.00999817	0.151008	0.136691	TFF2/MUC13/TFF1	3
BP	GO:0036150	phosphatidylserine acyl-chain remodeling	3/408	21/18866	0.00999817	0.151008	0.136691	PLA2G10/PLA2G1B/PLA2G4F	3
BP	GO:2001242	regulation of intrinsic apoptotic signaling pathway	9/408	166/18866	0.0102443	0.153993	0.139393	VNN1/S100A9/SNAI2/DAPK2/S100A8/MAGEA3/LRRK2/CLU/DDIAS	9
BP	GO:0006767	water-soluble vitamin metabolic process	6/408	85/18866	0.010277	0.153993	0.139393	VNN1/FOLR1/PRSS1/GCLC/SLC2A1/PRSS3	6
BP	GO:0050804	modulation of chemical synaptic transmission	18/408	454/18866	0.010333	0.154222	0.139601	CEL/CDH2/CACNA2D2/SCTR/AGER/SERPINE2/AKAP12/NGF/SYBU/CALB2/RETN/NPTX2/CSPG5/DKK1/LRRK2/RASGRF1/CPLX2/RGS4	18
BP	GO:0042303	molting cycle	7/408	111/18866	0.0104365	0.154549	0.139897	FST/CD109/KRT17/KRT16/EPS8L3/SOX21/DKK1	7
BP	GO:0042633	hair cycle	7/408	111/18866	0.0104365	0.154549	0.139897	FST/CD109/KRT17/KRT16/EPS8L3/SOX21/DKK1	7
BP	GO:0099177	regulation of trans-synaptic signaling	18/408	455/18866	0.0105517	0.155647	0.140891	CEL/CDH2/CACNA2D2/SCTR/AGER/SERPINE2/AKAP12/NGF/SYBU/CALB2/RETN/NPTX2/CSPG5/DKK1/LRRK2/RASGRF1/CPLX2/RGS4	18
BP	GO:0016572	histone phosphorylation	4/408	40/18866	0.0106597	0.156027	0.141234	CCNA2/CCNB1/CDK1/HMGA2	4
BP	GO:0072210	metanephric nephron development	4/408	40/18866	0.0106597	0.156027	0.141234	TCF21/IRX1/GREM1/AGTR2	4
BP	GO:0006919	activation of cysteine-type endopeptidase activity involved in apoptotic process	6/408	86/18866	0.0108524	0.157594	0.142653	S100A9/DLC1/NGF/S100A8/CTSH/COL4A3	6
BP	GO:0007405	neuroblast proliferation	5/408	62/18866	0.0108915	0.157594	0.142653	HHIP/VEGFC/ASPM/ARTN/LRRK2	5
BP	GO:1902475	L-alpha-amino acid transmembrane transport	5/408	62/18866	0.0108915	0.157594	0.142653	SLC47A1/SLC1A7/CLTRN/SLC7A10/RGS4	5
BP	GO:0050832	defense response to fungus	4/408	41/18866	0.011615	0.16679	0.150977	CTSG/S100A9/S100A8/S100A12	4
BP	GO:0071548	response to dexamethasone	4/408	41/18866	0.011615	0.16679	0.150977	CPS1/ABCC2/AGTR2/GJB2	4
BP	GO:0001894	tissue homeostasis	12/408	261/18866	0.0116852	0.167165	0.151316	ADGRF5/MFSD2A/TF/IL20RB/TFF2/MUC13/USH1C/SLC2A1/CTSH/SFTPD/NAPSA/TFF1	12
BP	GO:0001666	response to hypoxia	15/408	359/18866	0.011871	0.169183	0.153143	VEGFC/AK4/PLOD2/REG1A/MIR126/CCNA2/VEGFD/AGER/SLC2A1/CCNB1/STC2/LOXL2/CA9/AQP3/STC1	15
BP	GO:0007292	female gamete generation	8/408	142/18866	0.0121793	0.172928	0.156533	NCAPH/TOP2A/PLK1/ASPM/CCNB1/FOSL1/TTK/AFP	8
BP	GO:0031099	regeneration	10/408	201/18866	0.0123587	0.174665	0.158105	IGFBP1/FOLR1/REG1A/CCNA2/CPB2/CCNB1/PAX7/MYOZ1/CDK1/KLK6	10
BP	GO:0060135	maternal process involved in female pregnancy	5/408	64/18866	0.0123938	0.174665	0.158105	CTSV/STC2/TPPP3/STC1/GJB2	5
BP	GO:0006590	thyroid hormone generation	3/408	23/18866	0.0128965	0.179745	0.162704	DUOXA1/DUOX1/CGA	3
BP	GO:0070977	bone maturation	3/408	23/18866	0.0128965	0.179745	0.162704	RFLNA/FGFR3/GREM1	3
BP	GO:0097150	neuronal stem cell population maintenance	3/408	23/18866	0.0128965	0.179745	0.162704	CDH2/ASPM/IGF2BP1	3
BP	GO:0050954	sensory perception of mechanical stimulus	9/408	173/18866	0.0131634	0.182176	0.164904	CRYM/SNAI2/SERPINE2/CLIC5/USH1C/COL4A3/COL11A1/BIRC5/GJB2	9
BP	GO:0050921	positive regulation of chemotaxis	8/408	144/18866	0.013167	0.182176	0.164904	SCG2/VEGFC/VEGFD/LBP/DAPK2/AGER/ARTN/S100A7	8
BP	GO:0045444	fat cell differentiation	11/408	235/18866	0.0136376	0.187993	0.170169	ADRB1/ADGRF5/GDF10/PRDM16/SNAI2/WIF1/RETN/FNDC5/ITGA6/HMGA2/FABP3	11
BP	GO:0015701	bicarbonate transport	4/408	43/18866	0.0136866	0.187993	0.170169	CA4/CA3/CA9/SLC26A9	4
BP	GO:0060249	anatomical structure homeostasis	18/408	469/18866	0.0140181	0.190913	0.172813	ADGRF5/EXO1/NEK2/MFSD2A/TF/PKIB/IL20RB/TFF2/MUC13/USH1C/CALB2/SLC2A1/CTSH/SFTPD/NAPSA/TFF1/TSPOAP1/RAD51	18
BP	GO:0001656	metanephros development	6/408	91/18866	0.0140743	0.190913	0.172813	TCF21/IRX3/IRX1/CTSH/GREM1/AGTR2	6
BP	GO:0045682	regulation of epidermis development	6/408	91/18866	0.0140743	0.190913	0.172813	FST/CD109/CTSV/ALOX15B/KRT17/AQP3	6
BP	GO:1901568	fatty acid derivative metabolic process	9/408	175/18866	0.0141007	0.190913	0.172813	CYP4F3/GGTLC1/ALOX15B/PLA2G10/EPHX1/PLA2G1B/PLA2G4F/GGT6/AKR1C4	9
BP	GO:0007095	mitotic G2 DNA damage checkpoint	3/408	24/18866	0.0145067	0.195711	0.177156	CLSPN/CDK1/HMGA2	3
BP	GO:0032890	regulation of organic acid transport	5/408	67/18866	0.014901	0.19961	0.180685	PLA2G10/CLTRN/AGTR2/RGS4/FABP3	5
BP	GO:0050918	positive chemotaxis	5/408	67/18866	0.014901	0.19961	0.180685	SCG2/VEGFC/VEGFD/AGER/ARTN	5
BP	GO:0031667	response to nutrient levels	18/408	473/18866	0.0151573	0.202329	0.183146	ADRB1/CYP24A1/CTSV/MFSD2A/FOLR1/CPS1/SCTR/SNAI2/REG1A/GCLC/SLC2A1/STC2/KYNU/LRRK2/AQP3/SLC16A1/STC1/ALPL	18
BP	GO:2001251	negative regulation of chromosome organization	8/408	148/18866	0.0153163	0.203734	0.184418	NDC80/MAD2L1/TOP2A/PLK1/CCNB1/CENPF/TTK/BUB1B	8
BP	GO:0045132	meiotic chromosome segregation	6/408	93/18866	0.015532	0.205865	0.186347	NCAPH/TOP2A/PLK1/TTK/BUB1B/SGO1	6
BP	GO:0036293	response to decreased oxygen levels	15/408	371/18866	0.0155851	0.205865	0.186347	VEGFC/AK4/PLOD2/REG1A/MIR126/CCNA2/VEGFD/AGER/SLC2A1/CCNB1/STC2/LOXL2/CA9/AQP3/STC1	15
BP	GO:0072577	endothelial cell apoptotic process	5/408	68/18866	0.0158067	0.208067	0.188341	SCG2/MIR126/COL4A3/FGA/FGB	5
BP	GO:0014002	astrocyte development	4/408	45/18866	0.0159789	0.208165	0.188429	S100A9/AGER/S100A8/CDK6	4
BP	GO:0045616	regulation of keratinocyte differentiation	4/408	45/18866	0.0159789	0.208165	0.188429	CD109/CTSV/ALOX15B/AQP3	4
BP	GO:0051293	establishment of spindle localization	4/408	45/18866	0.0159789	0.208165	0.188429	NDC80/MAD2L1/CENPA/PLK1	4
BP	GO:0007517	muscle organ development	16/408	407/18866	0.0162218	0.209221	0.189385	POPDC3/PITX1/TCF21/DNER/HLF/CCNB1/CENPF/PAX7/TNNC1/COL11A1/PKP2/MYOZ1/CDK1/DKK1/GREM1/RGS4	16
BP	GO:0045109	intermediate filament organization	3/408	25/18866	0.0162255	0.209221	0.189385	KRT17/NEFH/PKP2	3
BP	GO:0051307	meiotic chromosome separation	3/408	25/18866	0.0162255	0.209221	0.189385	NCAPH/TOP2A/TTK	3
BP	GO:0060993	kidney morphogenesis	6/408	94/18866	0.0162987	0.209452	0.189594	TCF21/IRX3/IRX1/LRRK2/GREM1/AGTR2	6
BP	GO:0042063	gliogenesis	13/408	307/18866	0.0166728	0.213536	0.193291	S100A9/CDH2/DNER/KLF15/NKX2-1/TPPP/AGER/SERPINE2/S100A8/CDK6/CDK1/CSPG5/CLU	13
BP	GO:0021782	glial cell development	7/408	122/18866	0.0168628	0.21452	0.194182	S100A9/TPPP/AGER/S100A8/CDK6/CSPG5/CLU	7
BP	GO:1990266	neutrophil migration	7/408	122/18866	0.0168628	0.21452	0.194182	S100A9/LBP/DAPK2/CXCL5/S100A8/PLA2G1B/S100A12	7
BP	GO:0061041	regulation of wound healing	8/408	151/18866	0.0170874	0.21665	0.19611	CD109/TSPAN8/AGER/SERPINE2/CPB2/FGA/DUOX1/FGB	8
BP	GO:0001837	epithelial to mesenchymal transition	8/408	152/18866	0.0177092	0.221491	0.200491	TMEM100/FAM83D/SNAI2/NKX2-1/LOXL2/SERPINB3/HMGA2/GREM1	8
BP	GO:0002224	toll-like receptor signaling pathway	8/408	152/18866	0.0177092	0.221491	0.200491	S100A9/LBP/S100A8/FGA/SFTPD/SFTPA1/SFTPA2/FGB	8
BP	GO:0007605	sensory perception of sound	8/408	152/18866	0.0177092	0.221491	0.200491	CRYM/SNAI2/CLIC5/USH1C/COL4A3/COL11A1/BIRC5/GJB2	8
BP	GO:0001503	ossification	16/408	412/18866	0.0179768	0.221491	0.200491	HIF1A-AS2/VEGFC/CYP24A1/GDF10/CHRDL2/SNAI2/RFLNA/PTHLH/CDK6/COL11A1/FGFR3/CLEC3B/DKK1/GREM1/STC1/ALPL	16
BP	GO:0043434	response to peptide hormone	17/408	447/18866	0.0180453	0.221491	0.200491	IGFBP1/KLF15/CPS1/REG1A/CCNA2/GCLC/CDC6/SLC2A1/PLA2G1B/GGH/STC2/RETN/ABCC2/TFF1/AGTR2/GJB2/FABP3	17
BP	GO:0034114	regulation of heterotypic cell-cell adhesion	3/408	26/18866	0.0180536	0.221491	0.200491	AGER/FGA/FGB	3
BP	GO:0036152	phosphatidylethanolamine acyl-chain remodeling	3/408	26/18866	0.0180536	0.221491	0.200491	PLA2G10/PLA2G1B/PLA2G4F	3
BP	GO:0042730	fibrinolysis	3/408	26/18866	0.0180536	0.221491	0.200491	CPB2/FGA/FGB	3
BP	GO:0002688	regulation of leukocyte chemotaxis	7/408	124/18866	0.0182774	0.221491	0.200491	VEGFC/VEGFD/LBP/DAPK2/MST1L/S100A7/GREM1	7
BP	GO:0051101	regulation of DNA binding	7/408	124/18866	0.0182774	0.221491	0.200491	HJURP/CDCA5/NEK2/AGER/NGF/PAX7/HMGA2	7
BP	GO:0014075	response to amine	4/408	47/18866	0.0184986	0.221491	0.200491	CPS1/GLDC/CDK1/RGS4	4
BP	GO:0030574	collagen catabolic process	4/408	47/18866	0.0184986	0.221491	0.200491	MMP10/MMP12/PRSS2/KLK6	4
BP	GO:0002934	desmosome organization	2/408	10/18866	0.018717	0.221491	0.200491	SNAI2/PKP2	2
BP	GO:0009133	nucleoside diphosphate biosynthetic process	2/408	10/18866	0.018717	0.221491	0.200491	AK4/AK1	2
BP	GO:0030647	aminoglycoside antibiotic metabolic process	2/408	10/18866	0.018717	0.221491	0.200491	AKR1C4/AKR1B10	2
BP	GO:0060346	bone trabecula formation	2/408	10/18866	0.018717	0.221491	0.200491	CHAD/GREM1	2
BP	GO:0072070	loop of Henle development	2/408	10/18866	0.018717	0.221491	0.200491	IRX3/IRX1	2
BP	GO:1901748	leukotriene D4 metabolic process	2/408	10/18866	0.018717	0.221491	0.200491	GGTLC1/GGT6	2
BP	GO:1901750	leukotriene D4 biosynthetic process	2/408	10/18866	0.018717	0.221491	0.200491	GGTLC1/GGT6	2
BP	GO:1903862	positive regulation of oxidative phosphorylation	2/408	10/18866	0.018717	0.221491	0.200491	CCNB1/CDK1	2
BP	GO:1990823	response to leukemia inhibitory factor	6/408	97/18866	0.0187545	0.221491	0.200491	VEGFC/INA/PLA2G10/MYBL2/NEFH/GLDC	6
BP	GO:1990830	cellular response to leukemia inhibitory factor	6/408	97/18866	0.0187545	0.221491	0.200491	VEGFC/INA/PLA2G10/MYBL2/NEFH/GLDC	6
BP	GO:0007098	centrosome cycle	7/408	125/18866	0.019015	0.22387	0.202645	NDC80/NEK2/KIF11/PLK1/CDK1/SLC16A1/SGO1	7
BP	GO:0006835	dicarboxylic acid transport	6/408	98/18866	0.0196264	0.229641	0.207869	SLC1A7/SLC13A2/FOLR1/ABCC2/SLC26A9/TSPOAP1	6
BP	GO:2001243	negative regulation of intrinsic apoptotic signaling pathway	6/408	98/18866	0.0196264	0.229641	0.207869	VNN1/SNAI2/MAGEA3/LRRK2/CLU/DDIAS	6
BP	GO:0061035	regulation of cartilage development	5/408	72/18866	0.019795	0.230358	0.208518	SNAI2/RFLNA/PTHLH/LOXL2/GREM1	5
BP	GO:1904036	negative regulation of epithelial cell apoptotic process	4/408	48/18866	0.0198456	0.230358	0.208518	SCG2/MIR126/FGA/FGB	4
BP	GO:0006706	steroid catabolic process	3/408	27/18866	0.0199915	0.230358	0.208518	CEL/CYP24A1/HSD17B6	3
BP	GO:0015949	nucleobase-containing small molecule interconversion	3/408	27/18866	0.0199915	0.230358	0.208518	AK4/AK1/RRM2	3
BP	GO:0048799	animal organ maturation	3/408	27/18866	0.0199915	0.230358	0.208518	RFLNA/FGFR3/GREM1	3
BP	GO:0019886	antigen processing and presentation of exogenous peptide antigen via MHC class II	6/408	99/18866	0.0205254	0.235081	0.212793	KIF4A/CTSV/KIF23/KIF11/CENPE/KIF2C	6
BP	GO:0050830	defense response to Gram-positive bacterium	6/408	99/18866	0.0205254	0.235081	0.212793	CTSG/DMBT1/KRT6A/LBP/PLA2G1B/DEFB1	6
BP	GO:0015807	L-amino acid transport	5/408	73/18866	0.0208858	0.237772	0.21523	SLC47A1/SLC1A7/CLTRN/SLC7A10/RGS4	5
BP	GO:0072078	nephron tubule morphogenesis	5/408	73/18866	0.0208858	0.237772	0.21523	TCF21/IRX3/IRX1/GREM1/AGTR2	5
BP	GO:0001558	regulation of cell growth	16/408	420/18866	0.021084	0.23931	0.216621	S100A9/MFSD2A/IGFBP1/REG1A/SCGB3A1/KRT17/SERPINE2/NGF/GNG4/S100A8/SPOCK1/KIF14/PRSS2/GREM1/AGTR2/RGS4	16
BP	GO:0018198	peptidyl-cysteine modification	4/408	49/18866	0.0212515	0.240491	0.21769	S100A9/ZDHHC11B/S100A8/ZDHHC11	4
BP	GO:0072089	stem cell proliferation	7/408	128/18866	0.0213528	0.240918	0.218076	HHIP/VEGFC/SNAI2/ASPM/ARTN/LRRK2/HMGA2	7
BP	GO:0010669	epithelial structure maintenance	3/408	28/18866	0.0220394	0.243583	0.220489	TFF2/MUC13/TFF1	3
BP	GO:0021846	cell proliferation in forebrain	3/408	28/18866	0.0220394	0.243583	0.220489	KIF1A/KIF14/IGF2BP1	3
BP	GO:0042044	fluid transport	3/408	28/18866	0.0220394	0.243583	0.220489	AQP4/AQP3/AQP7	3
BP	GO:2000191	regulation of fatty acid transport	3/408	28/18866	0.0220394	0.243583	0.220489	PLA2G10/AGTR2/FABP3	3
BP	GO:0001578	microtubule bundle formation	6/408	101/18866	0.0224064	0.243583	0.220489	TPPP/CFAP157/PLK1/CFAP73/PRC1/TPPP3	6
BP	GO:0042116	macrophage activation	6/408	101/18866	0.0224064	0.243583	0.220489	ADGRF5/PLA2G10/LBP/AGER/LRRK2/CLU	6
BP	GO:0019852	L-ascorbic acid metabolic process	2/408	11/18866	0.0225528	0.243583	0.220489	GCLC/SLC2A1	2
BP	GO:0032253	dense core granule localization	2/408	11/18866	0.0225528	0.243583	0.220489	SYBU/KIF1A	2
BP	GO:0040015	negative regulation of multicellular organism growth	2/408	11/18866	0.0225528	0.243583	0.220489	ADRB1/STC2	2
BP	GO:0060159	regulation of dopamine receptor signaling pathway	2/408	11/18866	0.0225528	0.243583	0.220489	LRRK2/RGS4	2
BP	GO:0071281	cellular response to iron ion	2/408	11/18866	0.0225528	0.243583	0.220489	TF/CCNB1	2
BP	GO:0099519	dense core granule cytoskeletal transport	2/408	11/18866	0.0225528	0.243583	0.220489	SYBU/KIF1A	2
BP	GO:0150104	transport across blood-brain barrier	2/408	11/18866	0.0225528	0.243583	0.220489	MFSD2A/ABCC2	2
BP	GO:1901950	dense core granule transport	2/408	11/18866	0.0225528	0.243583	0.220489	SYBU/KIF1A	2
BP	GO:1903011	negative regulation of bone development	2/408	11/18866	0.0225528	0.243583	0.220489	RFLNA/GREM1	2
BP	GO:0045926	negative regulation of growth	11/408	254/18866	0.0228425	0.246011	0.222687	ADRB1/ALOX15B/SCGB3A1/SERPINE2/GNG4/STC2/MYOZ1/FGFR3/GREM1/AGTR2/RGS4	11
BP	GO:0071103	DNA conformation change	14/408	355/18866	0.023022	0.247242	0.223801	KNL1/HJURP/CDCA5/NCAPH/TOP2A/OIP5/CENPA/CCNB1/ERCC6L/CDK1/NCAPG/CENPI/HMGA2/RAD51	14
BP	GO:0032602	chemokine production	5/408	75/18866	0.0231835	0.247574	0.224102	S100A9/SNAI2/LBP/AGER/S100A8	5
BP	GO:0072088	nephron epithelium morphogenesis	5/408	75/18866	0.0231835	0.247574	0.224102	TCF21/IRX3/IRX1/GREM1/AGTR2	5
BP	GO:0019835	cytolysis	3/408	29/18866	0.0241974	0.254107	0.230015	KRT6A/LBP/C7	3
BP	GO:0036151	phosphatidylcholine acyl-chain remodeling	3/408	29/18866	0.0241974	0.254107	0.230015	PLA2G10/PLA2G1B/PLA2G4F	3
BP	GO:0042634	regulation of hair cycle	3/408	29/18866	0.0241974	0.254107	0.230015	FST/KRT17/EPS8L3	3
BP	GO:0060441	epithelial tube branching involved in lung morphogenesis	3/408	29/18866	0.0241974	0.254107	0.230015	HHIP/NKX2-1/CTSH	3
BP	GO:0071624	positive regulation of granulocyte chemotaxis	3/408	29/18866	0.0241974	0.254107	0.230015	LBP/DAPK2/S100A7	3
BP	GO:0090344	negative regulation of cell aging	3/408	29/18866	0.0241974	0.254107	0.230015	FOXM1/CDK6/HMGA2	3
BP	GO:0072091	regulation of stem cell proliferation	5/408	76/18866	0.0243912	0.254824	0.230664	VEGFC/SNAI2/ASPM/LRRK2/HMGA2	5
BP	GO:0002495	antigen processing and presentation of peptide antigen via MHC class II	6/408	103/18866	0.0244002	0.254824	0.230664	KIF4A/CTSV/KIF23/KIF11/CENPE/KIF2C	6
BP	GO:2001236	regulation of extrinsic apoptotic signaling pathway	8/408	162/18866	0.024846	0.256073	0.231795	SCG2/IL1A/SNAI2/GCLC/FGA/ITGA6/FGB/AGTR2	8
BP	GO:0002793	positive regulation of peptide secretion	9/408	193/18866	0.0248803	0.256073	0.231795	IL1A/VEGFC/CLTRN/SYBU/S100A8/FGA/PLA2G1B/FGB/AGTR2	9
BP	GO:0031424	keratinization	10/408	225/18866	0.024995	0.256073	0.231795	SPRR1B/SPRR3/KRT6A/KRT17/KRT16/KRT6B/SPRR1A/PKP2/SPRR2A/PI3	10
BP	GO:0007178	transmembrane receptor protein serine/threonine kinase signaling pathway	14/408	359/18866	0.0250273	0.256073	0.231795	FST/CD109/GDF10/TMEM100/PRDM16/TF/FOLR1/NKX2-1/ATOH8/VEPH1/DKK1/TTK/AFP/GREM1	14
BP	GO:0002504	antigen processing and presentation of peptide or polysaccharide antigen via MHC class II	6/408	104/18866	0.0254401	0.256073	0.231795	KIF4A/CTSV/KIF23/KIF11/CENPE/KIF2C	6
BP	GO:0061333	renal tubule morphogenesis	5/408	77/18866	0.0256386	0.256073	0.231795	TCF21/IRX3/IRX1/GREM1/AGTR2	5
BP	GO:0072028	nephron morphogenesis	5/408	77/18866	0.0256386	0.256073	0.231795	TCF21/IRX3/IRX1/GREM1/AGTR2	5
BP	GO:0090101	negative regulation of transmembrane receptor protein serine/threonine kinase signaling pathway	7/408	133/18866	0.02568	0.256073	0.231795	FST/CD109/PRDM16/NKX2-1/VEPH1/DKK1/GREM1	7
BP	GO:0051445	regulation of meiotic cell cycle	4/408	52/18866	0.0258285	0.256073	0.231795	ASPM/TTK/CDC25A/CDC25C	4
BP	GO:0060425	lung morphogenesis	4/408	52/18866	0.0258285	0.256073	0.231795	HHIP/TCF21/NKX2-1/CTSH	4
BP	GO:0070482	response to oxygen levels	15/408	396/18866	0.0261421	0.256073	0.231795	VEGFC/AK4/PLOD2/REG1A/MIR126/CCNA2/VEGFD/AGER/SLC2A1/CCNB1/STC2/LOXL2/CA9/AQP3/STC1	15
BP	GO:0043457	regulation of cellular respiration	3/408	30/18866	0.0264655	0.256073	0.231795	PRDM16/CCNB1/CDK1	3
BP	GO:0051642	centrosome localization	3/408	30/18866	0.0264655	0.256073	0.231795	MAD2L1/ASPM/DLGAP5	3
BP	GO:0044070	regulation of anion transport	6/408	105/18866	0.0265092	0.256073	0.231795	PLA2G10/CLTRN/AGTR2/STC1/RGS4/FABP3	6
BP	GO:0002024	diet induced thermogenesis	2/408	12/18866	0.0266813	0.256073	0.231795	ADRB1/SCTR	2
BP	GO:0002551	mast cell chemotaxis	2/408	12/18866	0.0266813	0.256073	0.231795	VEGFC/VEGFD	2
BP	GO:0010232	vascular transport	2/408	12/18866	0.0266813	0.256073	0.231795	MFSD2A/ABCC2	2
BP	GO:0032490	detection of molecule of bacterial origin	2/408	12/18866	0.0266813	0.256073	0.231795	DMBT1/LBP	2
BP	GO:0035404	histone-serine phosphorylation	2/408	12/18866	0.0266813	0.256073	0.231795	CCNB1/HMGA2	2
BP	GO:0035630	bone mineralization involved in bone maturation	2/408	12/18866	0.0266813	0.256073	0.231795	RFLNA/GREM1	2
BP	GO:0042182	ketone catabolic process	2/408	12/18866	0.0266813	0.256073	0.231795	CYP4F3/KYNU	2
BP	GO:0042363	fat-soluble vitamin catabolic process	2/408	12/18866	0.0266813	0.256073	0.231795	CYP24A1/CYP4F3	2
BP	GO:0045144	meiotic sister chromatid segregation	2/408	12/18866	0.0266813	0.256073	0.231795	BUB1B/SGO1	2
BP	GO:0051177	meiotic sister chromatid cohesion	2/408	12/18866	0.0266813	0.256073	0.231795	BUB1B/SGO1	2
BP	GO:0051798	positive regulation of hair follicle development	2/408	12/18866	0.0266813	0.256073	0.231795	FST/KRT17	2
BP	GO:0055015	ventricular cardiac muscle cell development	2/408	12/18866	0.0266813	0.256073	0.231795	CCNB1/CDK1	2
BP	GO:0060394	negative regulation of pathway-restricted SMAD protein phosphorylation	2/408	12/18866	0.0266813	0.256073	0.231795	DKK1/GREM1	2
BP	GO:0060536	cartilage morphogenesis	2/408	12/18866	0.0266813	0.256073	0.231795	SNAI2/STC1	2
BP	GO:0070601	centromeric sister chromatid cohesion	2/408	12/18866	0.0266813	0.256073	0.231795	BUB1B/SGO1	2
BP	GO:0071073	positive regulation of phospholipid biosynthetic process	2/408	12/18866	0.0266813	0.256073	0.231795	ADGRF5/FABP3	2
BP	GO:0072537	fibroblast activation	2/408	12/18866	0.0266813	0.256073	0.231795	GCLC/AKAP12	2
BP	GO:0097104	postsynaptic membrane assembly	2/408	12/18866	0.0266813	0.256073	0.231795	CEL/CDH2	2
BP	GO:0060395	SMAD protein signal transduction	5/408	78/18866	0.0269262	0.257771	0.233332	GDF10/TF/ATOH8/VEPH1/AFP	5
BP	GO:0045668	negative regulation of osteoblast differentiation	4/408	53/18866	0.0274756	0.262367	0.237493	VEGFC/GDF10/CDK6/GREM1	4
BP	GO:0034446	substrate adhesion-dependent cell spreading	6/408	106/18866	0.0276077	0.262967	0.238035	MELTF/FGA/CSPG5/KIF14/OLFM4/FGB	6
BP	GO:0048762	mesenchymal cell differentiation	10/408	229/18866	0.0277729	0.263217	0.238262	TCF21/TMEM100/FAM83D/FOLR1/SNAI2/NKX2-1/LOXL2/SERPINB3/HMGA2/GREM1	10
BP	GO:0050920	regulation of chemotaxis	10/408	229/18866	0.0277729	0.263217	0.238262	SCG2/VEGFC/VEGFD/LBP/DAPK2/AGER/ARTN/MST1L/S100A7/GREM1	10
BP	GO:0030104	water homeostasis	5/408	79/18866	0.0282542	0.266447	0.241186	SCTR/KRT16/AQP4/SCNN1B/AQP3	5
BP	GO:0042246	tissue regeneration	5/408	79/18866	0.0282542	0.266447	0.241186	IGFBP1/CCNB1/PAX7/MYOZ1/KLK6	5
BP	GO:0097191	extrinsic apoptotic signaling pathway	10/408	230/18866	0.0285004	0.268102	0.242683	SCG2/IL1A/SNAI2/GCLC/NGF/FGA/FGFR3/ITGA6/FGB/AGTR2	10
BP	GO:0021772	olfactory bulb development	3/408	31/18866	0.0288433	0.268661	0.243189	CRTAC1/KIF14/LRRK2	3
BP	GO:0061842	microtubule organizing center localization	3/408	31/18866	0.0288433	0.268661	0.243189	MAD2L1/ASPM/DLGAP5	3
BP	GO:0071549	cellular response to dexamethasone stimulus	3/408	31/18866	0.0288433	0.268661	0.243189	ABCC2/AGTR2/GJB2	3
BP	GO:1902230	negative regulation of intrinsic apoptotic signaling pathway in response to DNA damage	3/408	31/18866	0.0288433	0.268661	0.243189	SNAI2/CLU/DDIAS	3
BP	GO:0009620	response to fungus	4/408	54/18866	0.0291839	0.271167	0.245458	CTSG/S100A9/S100A8/S100A12	4
BP	GO:1902750	negative regulation of cell cycle G2/M phase transition	6/408	108/18866	0.0298939	0.274939	0.248872	ORC1/CDC6/PLK1/CLSPN/CDK1/HMGA2	6
BP	GO:0055002	striated muscle cell development	8/408	169/18866	0.0309043	0.274939	0.248872	DNER/CACNA2D2/FLNC/CCNB1/MYOZ1/CDK1/AGTR2/RGS4	8
BP	GO:0030199	collagen fibril organization	4/408	55/18866	0.0309539	0.274939	0.248872	COL12A1/LOXL2/COL11A1/GREM1	4
BP	GO:0007494	midgut development	2/408	13/18866	0.0310882	0.274939	0.248872	CPS1/REG1A	2
BP	GO:0010457	centriole-centriole cohesion	2/408	13/18866	0.0310882	0.274939	0.248872	NEK2/SGO1	2
BP	GO:0010958	regulation of amino acid import across plasma membrane	2/408	13/18866	0.0310882	0.274939	0.248872	CLTRN/RGS4	2
BP	GO:0015791	polyol transport	2/408	13/18866	0.0310882	0.274939	0.248872	AQP3/AQP7	2
BP	GO:0019755	one-carbon compound transport	2/408	13/18866	0.0310882	0.274939	0.248872	AQP3/AQP7	2
BP	GO:0021681	cerebellar granular layer development	2/408	13/18866	0.0310882	0.274939	0.248872	SERPINE2/KIF14	2
BP	GO:0032530	regulation of microvillus organization	2/408	13/18866	0.0310882	0.274939	0.248872	USH1C/RAP1GAP	2
BP	GO:0033089	positive regulation of T cell differentiation in thymus	2/408	13/18866	0.0310882	0.274939	0.248872	VNN1/IL1A	2
BP	GO:0042635	positive regulation of hair cycle	2/408	13/18866	0.0310882	0.274939	0.248872	FST/KRT17	2
BP	GO:0061430	bone trabecula morphogenesis	2/408	13/18866	0.0310882	0.274939	0.248872	CHAD/GREM1	2
BP	GO:0097531	mast cell migration	2/408	13/18866	0.0310882	0.274939	0.248872	VEGFC/VEGFD	2
BP	GO:1902947	regulation of tau-protein kinase activity	2/408	13/18866	0.0310882	0.274939	0.248872	DKK1/CLU	2
BP	GO:1903789	regulation of amino acid transmembrane transport	2/408	13/18866	0.0310882	0.274939	0.248872	CLTRN/RGS4	2
BP	GO:2000052	positive regulation of non-canonical Wnt signaling pathway	2/408	13/18866	0.0310882	0.274939	0.248872	DKK1/RSPO3	2
BP	GO:0001763	morphogenesis of a branching structure	9/408	201/18866	0.0311814	0.274939	0.248872	HHIP/TCF21/SNAI2/NKX2-1/CTSH/LRRK2/RSPO3/GREM1/AGTR2	9
BP	GO:0002221	pattern recognition receptor signaling pathway	9/408	201/18866	0.0311814	0.274939	0.248872	S100A9/SLC46A2/LBP/S100A8/FGA/SFTPD/SFTPA1/SFTPA2/FGB	9
BP	GO:0045862	positive regulation of proteolysis	14/408	370/18866	0.0312098	0.274939	0.248872	S100A9/MELTF/DLC1/AGER/GCLC/PLK1/NGF/S100A8/CTSH/COL4A3/SERPINB3/CLEC3B/LRRK2/CLU	14
BP	GO:0002063	chondrocyte development	3/408	32/18866	0.0313304	0.274939	0.248872	RFLNA/PTHLH/COL11A1	3
BP	GO:0002082	regulation of oxidative phosphorylation	3/408	32/18866	0.0313304	0.274939	0.248872	AK4/CCNB1/CDK1	3
BP	GO:0071295	cellular response to vitamin	3/408	32/18866	0.0313304	0.274939	0.248872	CYP24A1/FOLR1/SNAI2	3
BP	GO:1901976	regulation of cell cycle checkpoint	3/408	32/18866	0.0313304	0.274939	0.248872	NDC80/MAD2L1/CCNB1	3
BP	GO:0097305	response to alcohol	10/408	234/18866	0.0315462	0.276193	0.250007	HTR3A/S100A8/FOSB/GGH/FOSL1/GRAMD1B/CDK1/CA3/RAD51/RGS4	10
BP	GO:2000241	regulation of reproductive process	8/408	170/18866	0.0318455	0.278171	0.251798	PLA2G10/ASPM/SPINK13/DEFB1/RETN/TTK/CDC25A/CDC25C	8
BP	GO:0072009	nephron epithelium development	6/408	110/18866	0.032301	0.281501	0.254812	TCF21/IRX3/IRX1/KLF15/GREM1/AGTR2	6
BP	GO:0030193	regulation of blood coagulation	5/408	82/18866	0.0324845	0.282451	0.255672	TSPAN8/SERPINE2/CPB2/FGA/FGB	5
BP	GO:0060688	regulation of morphogenesis of a branching structure	4/408	56/18866	0.0327858	0.283298	0.256439	SNAI2/LRRK2/GREM1/AGTR2	4
BP	GO:1904645	response to amyloid-beta	4/408	56/18866	0.0327858	0.283298	0.256439	CACNB1/AGER/CACNA2D1/MMP12	4
BP	GO:0030307	positive regulation of cell growth	8/408	171/18866	0.0328061	0.283298	0.256439	S100A9/MFSD2A/IGFBP1/REG1A/KRT17/NGF/S100A8/PRSS2	8
BP	GO:0050714	positive regulation of protein secretion	8/408	172/18866	0.0337863	0.28688	0.259681	IL1A/VEGFC/CLTRN/SYBU/FGA/PLA2G1B/FGB/AGTR2	8
BP	GO:0009954	proximal/distal pattern formation	3/408	33/18866	0.0339263	0.28688	0.259681	IRX3/IRX1/GREM1	3
BP	GO:0010039	response to iron ion	3/408	33/18866	0.0339263	0.28688	0.259681	TF/CCNB1/TFF1	3
BP	GO:0021988	olfactory lobe development	3/408	33/18866	0.0339263	0.28688	0.259681	CRTAC1/KIF14/LRRK2	3
BP	GO:0051984	positive regulation of chromosome segregation	3/408	33/18866	0.0339263	0.28688	0.259681	CDC6/CCNB1/DLGAP5	3
BP	GO:0031145	anaphase-promoting complex-dependent catabolic process	5/408	83/18866	0.0339776	0.28688	0.259681	MAD2L1/PLK1/CCNB1/CDK1/BUB1B	5
BP	GO:0048708	astrocyte differentiation	5/408	83/18866	0.0339776	0.28688	0.259681	S100A9/AGER/SERPINE2/S100A8/CDK6	5
BP	GO:1900046	regulation of hemostasis	5/408	83/18866	0.0339776	0.28688	0.259681	TSPAN8/SERPINE2/CPB2/FGA/FGB	5
BP	GO:2000243	positive regulation of reproductive process	5/408	83/18866	0.0339776	0.28688	0.259681	PLA2G10/DEFB1/RETN/CDC25A/CDC25C	5
BP	GO:2001021	negative regulation of response to DNA damage stimulus	5/408	83/18866	0.0339776	0.28688	0.259681	SNAI2/AUNIP/HMGA2/CLU/DDIAS	5
BP	GO:0021543	pallium development	8/408	173/18866	0.0347862	0.293054	0.26527	CDH2/MFSD2A/NKX2-1/ASPM/SLC2A1/CDK6/KIF14/IGF2BP1	8
BP	GO:0007100	mitotic centrosome separation	2/408	14/18866	0.0357595	0.295992	0.267929	NEK2/KIF11	2
BP	GO:0007135	meiosis II	2/408	14/18866	0.0357595	0.295992	0.267929	BUB1B/SGO1	2
BP	GO:0009111	vitamin catabolic process	2/408	14/18866	0.0357595	0.295992	0.267929	CYP24A1/CYP4F3	2
BP	GO:0046940	nucleoside monophosphate phosphorylation	2/408	14/18866	0.0357595	0.295992	0.267929	AK4/AK1	2
BP	GO:0050872	white fat cell differentiation	2/408	14/18866	0.0357595	0.295992	0.267929	PRDM16/SNAI2	2
BP	GO:0061983	meiosis II cell cycle process	2/408	14/18866	0.0357595	0.295992	0.267929	BUB1B/SGO1	2
BP	GO:0070486	leukocyte aggregation	2/408	14/18866	0.0357595	0.295992	0.267929	S100A9/S100A8	2
BP	GO:0086069	bundle of His cell to Purkinje myocyte communication	2/408	14/18866	0.0357595	0.295992	0.267929	PKP2/CACNA2D1	2
BP	GO:0035296	regulation of tube diameter	7/408	143/18866	0.0360537	0.296485	0.268376	ADRB1/CPS1/GCLC/FGA/HTR1D/FGB/AGTR2	7
BP	GO:0072006	nephron development	7/408	143/18866	0.0360537	0.296485	0.268376	TCF21/IRX3/IRX1/KLF15/COL4A3/GREM1/AGTR2	7
BP	GO:0097746	regulation of blood vessel diameter	7/408	143/18866	0.0360537	0.296485	0.268376	ADRB1/CPS1/GCLC/FGA/HTR1D/FGB/AGTR2	7
BP	GO:0006658	phosphatidylserine metabolic process	3/408	34/18866	0.0366303	0.296769	0.268632	PLA2G10/PLA2G1B/PLA2G4F	3
BP	GO:0018149	peptide cross-linking	3/408	34/18866	0.0366303	0.296769	0.268632	SPRR1B/SPRR1A/PI3	3
BP	GO:0042311	vasodilation	3/408	34/18866	0.0366303	0.296769	0.268632	ADRB1/CPS1/AGTR2	3
BP	GO:0042908	xenobiotic transport	3/408	34/18866	0.0366303	0.296769	0.268632	SLC47A1/SLC2A1/ABCC2	3
BP	GO:1902692	regulation of neuroblast proliferation	3/408	34/18866	0.0366303	0.296769	0.268632	VEGFC/ASPM/LRRK2	3
BP	GO:0007566	embryo implantation	4/408	58/18866	0.0366362	0.296769	0.268632	STC2/TPPP3/SCGB1A1/STC1	4
BP	GO:0019369	arachidonic acid metabolic process	4/408	58/18866	0.0366362	0.296769	0.268632	CYP4F3/ALOX15B/PLA2G10/EPHX1	4
BP	GO:0045927	positive regulation of growth	11/408	274/18866	0.0367478	0.297039	0.268877	S100A9/MFSD2A/IGFBP1/CACNA2D2/REG1A/KRT17/NGF/S100A8/CCNB1/CDK1/PRSS2	11
BP	GO:0050680	negative regulation of epithelial cell proliferation	8/408	175/18866	0.0368457	0.297196	0.269019	SCG2/CD109/SNAI2/MIR126/ATOH8/COL4A3/CPB2/CDK6	8
BP	GO:0035150	regulation of tube size	7/408	144/18866	0.0372231	0.299603	0.271198	ADRB1/CPS1/GCLC/FGA/HTR1D/FGB/AGTR2	7
BP	GO:0050673	epithelial cell proliferation	16/408	453/18866	0.0383534	0.308046	0.27884	FST/SCG2/CD109/VEGFC/SERPINB5/SNAI2/REG1A/MIR126/VEGFD/ATOH8/COL4A3/CPB2/LOXL2/CDK6/MST1L/MMP12	16
BP	GO:0043030	regulation of macrophage activation	4/408	59/18866	0.0386549	0.309158	0.279847	ADGRF5/PLA2G10/LBP/LRRK2	4
BP	GO:0071385	cellular response to glucocorticoid stimulus	4/408	59/18866	0.0386549	0.309158	0.279847	ABCC2/AGTR2/STC1/GJB2	4
BP	GO:0140013	meiotic nuclear division	8/408	177/18866	0.0389858	0.311148	0.281648	NCAPH/TOP2A/PLK1/ASPM/TTK/BUB1B/RAD51/SGO1	8
BP	GO:0000083	regulation of transcription involved in G1/S transition of mitotic cell cycle	3/408	35/18866	0.0394415	0.312809	0.283152	ORC1/CDC6/RRM2	3
BP	GO:0046471	phosphatidylglycerol metabolic process	3/408	35/18866	0.0394415	0.312809	0.283152	PLA2G10/PLA2G1B/PLA2G4F	3
BP	GO:0110111	negative regulation of animal organ morphogenesis	3/408	35/18866	0.0394415	0.312809	0.283152	CHAD/CPB2/GREM1	3
BP	GO:0001942	hair follicle development	5/408	87/18866	0.0403716	0.317106	0.287041	FST/CD109/KRT17/SOX21/DKK1	5
BP	GO:0006890	retrograde vesicle-mediated transport, Golgi to endoplasmic reticulum	5/408	87/18866	0.0403716	0.317106	0.287041	KIF4A/KIF23/KIF11/CENPE/KIF2C	5
BP	GO:0032252	secretory granule localization	2/408	15/18866	0.0406818	0.317106	0.287041	SYBU/KIF1A	2
BP	GO:0046033	AMP metabolic process	2/408	15/18866	0.0406818	0.317106	0.287041	AK4/AK1	2
BP	GO:0051299	centrosome separation	2/408	15/18866	0.0406818	0.317106	0.287041	NEK2/KIF11	2
BP	GO:0090594	inflammatory response to wounding	2/408	15/18866	0.0406818	0.317106	0.287041	IL1A/AGER	2
BP	GO:0099188	postsynaptic cytoskeleton organization	2/408	15/18866	0.0406818	0.317106	0.287041	INA/NEFH	2
BP	GO:2000095	regulation of Wnt signaling pathway, planar cell polarity pathway	2/408	15/18866	0.0406818	0.317106	0.287041	DKK1/RSPO3	2
BP	GO:0030865	cortical cytoskeleton organization	4/408	60/18866	0.0407361	0.317106	0.287041	KIF23/ECT2/ANLN/RHOBTB2	4
BP	GO:0007043	cell-cell junction assembly	7/408	147/18866	0.0408802	0.317575	0.287466	CLDN2/ECT2/SNAI2/CLDN8/PKP2/CDHR3/GJB2	7
BP	GO:0031109	microtubule polymerization or depolymerization	6/408	117/18866	0.0417024	0.32264	0.292051	SKA1/TPPP/TPX2/KIF2C/SKA3/TPPP3	6
BP	GO:1904019	epithelial cell apoptotic process	6/408	117/18866	0.0417024	0.32264	0.292051	SCG2/MIR126/COL4A3/FGA/PLA2G1B/FGB	6
BP	GO:0046470	phosphatidylcholine metabolic process	5/408	88/18866	0.0420765	0.324211	0.293473	MFSD2A/PLA2G10/PLA2G1B/PLA2G4F/FABP3	5
BP	GO:0050818	regulation of coagulation	5/408	88/18866	0.0420765	0.324211	0.293473	TSPAN8/SERPINE2/CPB2/FGA/FGB	5
BP	GO:0051973	positive regulation of telomerase activity	3/408	36/18866	0.0423589	0.325066	0.294247	NEK2/PKIB/GREM1	3
BP	GO:1901661	quinone metabolic process	3/408	36/18866	0.0423589	0.325066	0.294247	CYP4F3/AKR1C4/AKR1B10	3
BP	GO:0016266	O-glycan processing	4/408	61/18866	0.0428797	0.328398	0.297263	MUC5AC/B3GNT8/MUCL1/MUC13	4
BP	GO:0033559	unsaturated fatty acid metabolic process	6/408	118/18866	0.0431721	0.32997	0.298686	CYP4F3/ALOX15B/PLA2G10/EPHX1/PLA2G4F/AKR1C4	6
BP	GO:0010950	positive regulation of endopeptidase activity	8/408	181/18866	0.0435119	0.331899	0.300432	S100A9/DLC1/AGER/NGF/S100A8/CTSH/COL4A3/SERPINB3	8
BP	GO:0022404	molting cycle process	5/408	89/18866	0.0438242	0.332941	0.301375	FST/CD109/KRT17/SOX21/DKK1	5
BP	GO:0022405	hair cycle process	5/408	89/18866	0.0438242	0.332941	0.301375	FST/CD109/KRT17/SOX21/DKK1	5
BP	GO:0034113	heterotypic cell-cell adhesion	4/408	62/18866	0.0450858	0.337447	0.305454	AGER/FGA/PKP2/FGB	4
BP	GO:0060393	regulation of pathway-restricted SMAD protein phosphorylation	4/408	62/18866	0.0450858	0.337447	0.305454	GDF10/DKK1/TTK/GREM1	4
BP	GO:0071384	cellular response to corticosteroid stimulus	4/408	62/18866	0.0450858	0.337447	0.305454	ABCC2/AGTR2/STC1/GJB2	4
BP	GO:2000351	regulation of endothelial cell apoptotic process	4/408	62/18866	0.0450858	0.337447	0.305454	SCG2/MIR126/FGA/FGB	4
BP	GO:0042692	muscle cell differentiation	14/408	390/18866	0.0451896	0.337447	0.305454	POPDC3/CDH2/DNER/CACNA2D2/FLNC/SCGB3A1/ADAM12/CCNB1/MYOZ1/CDK1/DKK1/GREM1/AGTR2/RGS4	14
BP	GO:0043044	ATP-dependent chromatin remodeling	5/408	90/18866	0.0456149	0.337447	0.305454	KNL1/HJURP/OIP5/CENPA/CENPI	5
BP	GO:0098773	skin epidermis development	5/408	90/18866	0.0456149	0.337447	0.305454	FST/CD109/KRT17/SOX21/DKK1	5
BP	GO:0007379	segment specification	2/408	16/18866	0.0458421	0.337447	0.305454	IRX3/IRX1	2
BP	GO:0017014	protein nitrosylation	2/408	16/18866	0.0458421	0.337447	0.305454	S100A9/S100A8	2
BP	GO:0018119	peptidyl-cysteine S-nitrosylation	2/408	16/18866	0.0458421	0.337447	0.305454	S100A9/S100A8	2
BP	GO:0042035	regulation of cytokine biosynthetic process	2/408	16/18866	0.0458421	0.337447	0.305454	IGF2BP3/IGF2BP1	2
BP	GO:0051770	positive regulation of nitric-oxide synthase biosynthetic process	2/408	16/18866	0.0458421	0.337447	0.305454	AKAP12/LRRK2	2
BP	GO:0072224	metanephric glomerulus development	2/408	16/18866	0.0458421	0.337447	0.305454	TCF21/AGTR2	2
BP	GO:1902514	regulation of calcium ion transmembrane transport via high voltage-gated calcium channel	2/408	16/18866	0.0458421	0.337447	0.305454	CACNB1/CACNA2D1	2
BP	GO:0055001	muscle cell development	8/408	183/18866	0.0458998	0.337447	0.305454	DNER/CACNA2D2/FLNC/CCNB1/MYOZ1/CDK1/AGTR2/RGS4	8
BP	GO:1903034	regulation of response to wounding	8/408	183/18866	0.0458998	0.337447	0.305454	CD109/TSPAN8/AGER/SERPINE2/CPB2/FGA/DUOX1/FGB	8
BP	GO:0030900	forebrain development	14/408	391/18866	0.0459879	0.337447	0.305454	PITX1/CDH2/MFSD2A/NKX2-1/DLC1/KIF1A/ASPM/SLC2A1/CRTAC1/CDK6/KIF14/DKK1/LRRK2/IGF2BP1	14
BP	GO:0009636	response to toxic substance	10/408	250/18866	0.0460196	0.337447	0.305454	S100A9/CPS1/EPHX1/CCNB1/INMT/DUOX1/CDK1/ABCC2/AKR1B10/RAD51	10
BP	GO:0007062	sister chromatid cohesion	4/408	63/18866	0.0473542	0.346564	0.313706	CDCA5/PLK1/BUB1B/SGO1	4
BP	GO:2000177	regulation of neural precursor cell proliferation	5/408	91/18866	0.0474487	0.346586	0.313726	CIP2A/CDH2/VEGFC/ASPM/LRRK2	5
BP	GO:0120254	olefinic compound metabolic process	6/408	121/18866	0.0477742	0.348293	0.315271	CYP4F3/ALOX15B/PLA2G10/EPHX1/AFP/AKR1C4	6
BP	GO:0019884	antigen processing and presentation of exogenous antigen	8/408	185/18866	0.048372	0.351974	0.318603	KIF4A/CTSV/KIF23/KIF11/CD207/CD1E/CENPE/KIF2C	8
BP	GO:0000082	G1/S transition of mitotic cell cycle	11/408	287/18866	0.048468	0.351996	0.318624	ORC1/CDC6/CCNB1/MCM10/CDK6/CDK1/KIF14/RRM2/CDKN3/CDC25A/CDC25C	11
BP	GO:0031668	cellular response to extracellular stimulus	10/408	253/18866	0.0491621	0.352581	0.319153	CYP24A1/CTSV/MFSD2A/FOLR1/SNAI2/SLC2A1/FOSL1/ITGA6/LRRK2/AQP3	10
BP	GO:0009914	hormone transport	12/408	323/18866	0.0492083	0.352581	0.319153	CRYM/CACNA2D2/CLTRN/SYBU/SLC2A1/FGA/SLCO4A1/RETN/ABCC2/FGB/AGTR2/SLC16A1	12
BP	GO:0051056	regulation of small GTPase mediated signal transduction	12/408	323/18866	0.0492083	0.352581	0.319153	ARHGAP11A/RHOV/ECT2/DLC1/NGF/FOXM1/EPS8L3/DEPDC1B/RHOBTB2/KIF14/RAP1GAP/RASGRF1	12
BP	GO:0050678	regulation of epithelial cell proliferation	14/408	395/18866	0.0492799	0.352581	0.319153	SCG2/CD109/VEGFC/SERPINB5/SNAI2/REG1A/MIR126/VEGFD/ATOH8/COL4A3/CPB2/CDK6/MST1L/MMP12	14
BP	GO:0003333	amino acid transmembrane transport	5/408	92/18866	0.0493256	0.352581	0.319153	SLC47A1/SLC1A7/CLTRN/SLC7A10/RGS4	5
BP	GO:0010811	positive regulation of cell-substrate adhesion	6/408	122/18866	0.0493731	0.352581	0.319153	FGA/CDK6/CSPG5/ITGA6/OLFM4/FGB	6
BP	GO:0045471	response to ethanol	6/408	122/18866	0.0493731	0.352581	0.319153	HTR3A/S100A8/GGH/CDK1/CA3/RGS4	6
BP	GO:0031589	cell-substrate adhesion	13/408	359/18866	0.0494379	0.352581	0.319153	MELTF/LYPD3/DLC1/FGA/SPOCK1/CDK6/CSPG5/ITGA6/KIF14/OLFM4/MMP12/FGB/GREM1	13
BP	GO:0032835	glomerulus development	4/408	64/18866	0.0496849	0.352581	0.319153	TCF21/KLF15/COL4A3/AGTR2	4
CC	GO:0000777	condensed chromosome kinetochore	18/423	106/19559	1.26216e-11	2.01094e-09	1.70615e-09	NDC80/KNL1/HJURP/NEK2/SKA1/MAD2L1/CENPA/PLK1/CCNB1/SPC25/CENPF/ERCC6L/CENPE/KIF2C/SKA3/BIRC5/BUB1B/SGO1	18
CC	GO:0000776	kinetochore	20/423	137/19559	1.63338e-11	2.01094e-09	1.70615e-09	NDC80/KNL1/HJURP/NEK2/SKA1/MAD2L1/CENPA/PLK1/CCNB1/SPC25/CENPF/ERCC6L/TTK/CENPE/CENPI/KIF2C/SKA3/BIRC5/BUB1B/SGO1	20
CC	GO:0000779	condensed chromosome, centromeric region	19/423	122/19559	1.64832e-11	2.01094e-09	1.70615e-09	NDC80/KNL1/HJURP/NEK2/SKA1/MAD2L1/CENPA/PLK1/CCNB1/SPC25/CENPF/ERCC6L/NCAPG/CENPE/KIF2C/SKA3/BIRC5/BUB1B/SGO1	19
CC	GO:0000775	chromosome, centromeric region	23/423	196/19559	4.80532e-11	4.39686e-09	3.73044e-09	NDC80/KNL1/HJURP/CDCA5/NEK2/SKA1/MAD2L1/OIP5/CENPA/PLK1/CCNB1/SPC25/CENPF/ERCC6L/NCAPG/TTK/CENPE/CENPI/KIF2C/SKA3/BIRC5/BUB1B/SGO1	23
CC	GO:0000793	condensed chromosome	23/423	222/19559	5.92442e-10	4.33667e-08	3.67938e-08	NDC80/KNL1/HJURP/NEK2/NCAPH/SKA1/MAD2L1/TOP2A/CENPA/PLK1/CCNB1/SPC25/CENPF/ERCC6L/NCAPG/CENPE/KIF2C/SKA3/BIRC5/BUB1B/RAD51/SGO1/MKI67	23
CC	GO:0042599	lamellar body	8/423	17/19559	9.18424e-10	5.60239e-08	4.75325e-08	CTSH/SFTA3/SFTPB/SFTPA1/SFTPC/NAPSA/SFTPA2/ABCA3	8
CC	GO:0000940	condensed chromosome outer kinetochore	7/423	14/19559	6.34179e-09	3.31585e-07	2.81328e-07	NDC80/SKA1/PLK1/CCNB1/CENPF/SKA3/BUB1B	7
CC	GO:0005819	spindle	28/423	367/19559	8.81222e-09	4.03159e-07	3.42053e-07	KIF4A/NEK2/KIF23/SKA1/MAD2L1/FAM83D/ECT2/TPPP/CKAP2L/CDC6/KIF11/PLK1/ASPM/CCNB1/CENPF/AUNIP/CDK1/TPX2/KIF14/TTK/CENPE/DLGAP5/KIF2C/PRC1/SKA3/BIRC5/BUB1B/SGO1	28
CC	GO:0098687	chromosomal region	26/423	350/19559	5.17933e-08	2.10626e-06	1.78702e-06	NDC80/KNL1/ORC1/HJURP/CDCA5/NEK2/SKA1/MAD2L1/OIP5/CENPA/PLK1/CCNB1/SPC25/CENPF/ERCC6L/CDK1/NCAPG/TTK/CENPE/CENPI/KIF2C/SKA3/BIRC5/BUB1B/RAD51/SGO1	26
CC	GO:0062023	collagen-containing extracellular matrix	29/423	427/19559	6.18135e-08	2.26237e-06	1.91947e-06	CTSG/SLPI/MFAP5/S100A9/LAMC2/CDH2/MFAP4/GDF10/LAMA3/GPC6/PRSS1/SPP2/SERPINE2/COL12A1/S100A8/CTSH/COL4A3/FGA/SERPINA5/LOXL2/COL11A1/ADAMTS8/S100A7/ITGA6/CLEC3B/TGFBI/FGB/GREM1/CLU	29
CC	GO:0034774	secretory granule lumen	23/423	322/19559	6.14431e-07	2.04438e-05	1.73452e-05	CTSG/SLPI/S100A9/VEGFC/TF/VEGFD/SPP2/SCG3/S100A8/CTSH/FGA/SERPINA4/GGH/RETN/SERPINB3/S100P/S100A7/CLEC3B/OLFM4/FGB/PRSS2/S100A12/CLU	23
CC	GO:0060205	cytoplasmic vesicle lumen	23/423	326/19559	7.61594e-07	2.32286e-05	1.97079e-05	CTSG/SLPI/S100A9/VEGFC/TF/VEGFD/SPP2/SCG3/S100A8/CTSH/FGA/SERPINA4/GGH/RETN/SERPINB3/S100P/S100A7/CLEC3B/OLFM4/FGB/PRSS2/S100A12/CLU	23
CC	GO:0031983	vesicle lumen	23/423	328/19559	8.46724e-07	2.38385e-05	2.02254e-05	CTSG/SLPI/S100A9/VEGFC/TF/VEGFD/SPP2/SCG3/S100A8/CTSH/FGA/SERPINA4/GGH/RETN/SERPINB3/S100P/S100A7/CLEC3B/OLFM4/FGB/PRSS2/S100A12/CLU	23
CC	GO:0072686	mitotic spindle	14/423	133/19559	1.16664e-06	3.04993e-05	2.58766e-05	KIF23/SKA1/MAD2L1/FAM83D/ECT2/TPPP/CKAP2L/KIF11/ASPM/CDK1/TPX2/CENPE/PRC1/SKA3	14
CC	GO:0000922	spindle pole	15/423	165/19559	3.12888e-06	7.63446e-05	6.47732e-05	NEK2/MAD2L1/FAM83D/CKAP2L/CDC6/KIF11/PLK1/ASPM/CCNB1/CENPF/AUNIP/TPX2/DLGAP5/PRC1/SGO1	15
CC	GO:0030496	midbody	15/423	182/19559	1.03923e-05	0.000237725	0.000201694	KIF4A/NEK2/KIF23/ECT2/ANLN/PLK1/ASPM/SLC2A1/CENPF/CDK1/KIF14/CENPE/CEP55/PRC1/BIRC5	15
CC	GO:0005876	spindle microtubule	9/423	66/19559	1.18229e-05	0.00025454	0.00021596	KIF4A/SKA1/KIF11/PLK1/CDK1/CENPE/PRC1/SKA3/BIRC5	9
CC	GO:0000778	condensed nuclear chromosome kinetochore	5/423	17/19559	2.30682e-05	0.000469052	0.000397959	NDC80/CENPA/PLK1/CCNB1/BUB1B	5
CC	GO:0045177	apical part of cell	24/423	433/19559	2.72088e-05	0.000524128	0.000444687	SLC47A1/ADGRF5/CDH2/CTSV/SLC15A1/RHCG/TF/FOLR1/AGER/MUC13/CLIC5/USH1C/CA4/ASPM/SLC2A1/UPK1B/DUOX1/SCNN1B/ABCC2/SLC26A9/PTPRH/GPIHBP1/SLC16A1/STC1	24
CC	GO:0016324	apical plasma membrane	21/423	361/19559	4.31162e-05	0.000789027	0.000669436	SLC47A1/CDH2/SLC15A1/RHCG/TF/FOLR1/AGER/MUC13/CLIC5/CA4/ASPM/SLC2A1/UPK1B/DUOX1/SCNN1B/ABCC2/SLC26A9/PTPRH/GPIHBP1/SLC16A1/STC1	21
CC	GO:0005771	multivesicular body	8/423	62/19559	5.45113e-05	0.000924098	0.000784035	CTSH/SFTPB/SFTPD/SFTPA1/SFTPC/NAPSA/LRRK2/SFTPA2	8
CC	GO:0000780	condensed nuclear chromosome, centromeric region	6/423	32/19559	5.55469e-05	0.000924098	0.000784035	NDC80/CENPA/PLK1/CCNB1/BUB1B/SGO1	6
CC	GO:0031091	platelet alpha granule	9/423	91/19559	0.000155643	0.00247676	0.00210136	PCDH7/CD109/VEGFC/VEGFD/SERPINE2/FGA/SERPINA5/FGB/CLU	9
CC	GO:0005874	microtubule	22/423	431/19559	0.000191844	0.00292563	0.0024822	KIF4A/NEK2/KIF23/SKA1/SCTR/TPPP/KIF11/PLK1/SYBU/KIF1A/TUBA4B/ASPM/CDK1/TPX2/KIF14/CENPE/KIF2C/PRC1/SKA3/TPPP3/TEKT1/BIRC5	22
CC	GO:0045334	clathrin-coated endocytic vesicle	7/423	59/19559	0.000272453	0.00398871	0.00338415	SFTA3/CD207/SFTPB/SFTPD/SFTPA1/SFTPC/SFTPA2	7
CC	GO:0001533	cornified envelope	6/423	45/19559	0.000393918	0.00538253	0.00456671	SPRR1B/SPRR3/SPRR1A/PKP2/SPRR2A/PI3	6
CC	GO:0000794	condensed nuclear chromosome	9/423	103/19559	0.000397072	0.00538253	0.00456671	NDC80/NEK2/NCAPH/CENPA/PLK1/CCNB1/BUB1B/RAD51/SGO1	9
CC	GO:0031904	endosome lumen	5/423	35/19559	0.000878582	0.0114843	0.00974367	NGF/CTSH/SFTPB/SFTPC/NAPSA	5
CC	GO:0051233	spindle midzone	5/423	36/19559	0.00100239	0.0126508	0.0107334	CDC6/PLK1/KIF14/CENPE/PRC1	5
CC	GO:0031225	anchored component of membrane	11/423	171/19559	0.0012739	0.0155415	0.013186	VNN1/MELTF/CD109/CPM/LYPD3/FOLR1/GPC6/CA4/PSCA/GPIHBP1/ALPL	11
CC	GO:0005775	vacuolar lumen	11/423	173/19559	0.00139885	0.0165155	0.0140123	CTSG/CTSV/GPC6/DAPK2/GGH/RETN/SERPINB3/CSPG5/S100A7/CD1E/PRSS2	11
CC	GO:0005796	Golgi lumen	8/423	103/19559	0.00177887	0.0203458	0.0172621	MUC5AC/GPC6/MUCL1/MUC13/NGF/DEFB1/CGA/CSPG5	8
CC	GO:0046658	anchored component of plasma membrane	6/423	60/19559	0.00184483	0.0204608	0.0173596	MELTF/LYPD3/FOLR1/GPC6/CA4/GPIHBP1	6
CC	GO:0005581	collagen trimer	7/423	87/19559	0.00278555	0.0295625	0.0250818	C1QL2/COL12A1/COL4A3/COL11A1/SFTPD/SFTPA1/SFTPA2	7
CC	GO:0016323	basolateral plasma membrane	13/423	246/19559	0.00282701	0.0295625	0.0250818	SLC47A1/CDH2/RHCG/TF/FOLR1/CLDN8/SLC2A1/AQP4/CA9/ITGA6/AQP3/GPIHBP1/SLC16A1	13
CC	GO:0005788	endoplasmic reticulum lumen	15/423	308/19559	0.00304582	0.0302818	0.0256921	SCG2/MELTF/CDH2/IGFBP1/SERPIND1/TF/SPP2/SCG3/COL12A1/COL4A3/FGA/STC2/COL11A1/AFP/CLU	15
CC	GO:0031089	platelet dense granule lumen	3/423	14/19559	0.00306128	0.0302818	0.0256921	SPP2/SERPINA4/CLEC3B	3
CC	GO:0045171	intercellular bridge	6/423	71/19559	0.00432842	0.0416895	0.0353707	KIF23/FAM83D/TPX2/OLFM4/CEP55/PRC1	6
CC	GO:0045120	pronucleus	3/423	16/19559	0.004561	0.0428032	0.0363156	CCNA2/SLC2A1/CENPF	3
CC	GO:0005871	kinesin complex	5/423	51/19559	0.00479522	0.0428773	0.0363785	KIF23/KIF11/KIF1A/KIF14/KIF2C	5
CC	GO:0005921	gap junction	4/423	32/19559	0.0048032	0.0428773	0.0363785	GJB3/CALB2/GJB5/GJB2	4
CC	GO:0005938	cell cortex	14/423	305/19559	0.00687805	0.0599373	0.0508528	LAMC2/CDH2/ECT2/ANLN/DLC1/AKAP12/CLIC5/CALB2/SLC2A1/FGA/RHOBTB2/FGB/AQP7/MELK	14
CC	GO:0031362	anchored component of external side of plasma membrane	3/423	19/19559	0.00752246	0.0640284	0.0543238	FOLR1/CA4/GPIHBP1	3
CC	GO:0042383	sarcolemma	8/423	135/19559	0.009159	0.0761863	0.0646389	POPDC3/CCDC78/CDH2/FLNC/CACNB1/SLC2A1/AQP4/CACNA2D1	8
CC	GO:0005791	rough endoplasmic reticulum	6/423	84/19559	0.00973136	0.077879	0.0660751	PLOD2/CA4/SFTPD/SFTPA1/SFTPA2/SCGB1A1	6
CC	GO:0005922	connexin complex	3/423	21/19559	0.0100009	0.077879	0.0660751	GJB3/GJB5/GJB2	3
CC	GO:0042827	platelet dense granule	3/423	21/19559	0.0100009	0.077879	0.0660751	SPP2/SERPINA4/CLEC3B	3
CC	GO:0000307	cyclin-dependent protein kinase holoenzyme complex	4/423	43/19559	0.0136922	0.104403	0.088579	CCNA2/CCNB1/CDK6/CDK1	4
CC	GO:0035578	azurophil granule lumen	6/423	91/19559	0.0140847	0.105204	0.0892585	CTSG/GGH/RETN/SERPINB3/S100A7/PRSS2	6
CC	GO:0031233	intrinsic component of external side of plasma membrane	3/423	24/19559	0.0145104	0.106216	0.0901173	FOLR1/CA4/GPIHBP1	3
CC	GO:0031093	platelet alpha granule lumen	5/423	67/19559	0.0149093	0.106996	0.0907793	VEGFC/VEGFD/FGA/FGB/CLU	5
CC	GO:0005902	microvillus	6/423	93/19559	0.0155432	0.1094	0.0928189	CTSV/USH1C/CA9/S100P/LRRK2/PTPRH	6
CC	GO:0045178	basal part of cell	5/423	69/19559	0.0167577	0.115723	0.0981832	GKN2/TF/REG1A/ITGA6/SLC16A1	5
CC	GO:0031528	microvillus membrane	3/423	26/19559	0.0180581	0.120168	0.101955	CA9/S100P/PTPRH	3
CC	GO:0036379	myofilament	3/423	26/19559	0.0180581	0.120168	0.101955	TNNC2/TNNC1/MYBPHL	3
CC	GO:0001527	microfibril	2/423	10/19559	0.0187193	0.120198	0.101979	MFAP5/MFAP4	2
CC	GO:0070938	contractile ring	2/423	10/19559	0.0187193	0.120198	0.101979	ANLN/PRC1	2
CC	GO:0005604	basement membrane	6/423	103/19559	0.0244162	0.154074	0.130722	LAMC2/LAMA3/COL4A3/LOXL2/ITGA6/TGFBI	6
CC	GO:0030136	clathrin-coated vesicle	9/423	194/19559	0.0256423	0.159069	0.134959	TF/FOLR1/SFTA3/CD207/SFTPB/SFTPD/SFTPA1/SFTPC/SFTPA2	9
CC	GO:0043256	laminin complex	2/423	12/19559	0.0266845	0.160107	0.13584	LAMC2/LAMA3	2
CC	GO:0098992	neuronal dense core vesicle	2/423	12/19559	0.0266845	0.160107	0.13584	SCG2/KIF1A	2
CC	GO:0090543	Flemming body	3/423	31/19559	0.0288499	0.169489	0.1438	KIF23/KIF14/CEP55	3
CC	GO:0016528	sarcoplasm	5/423	80/19559	0.0296375	0.169489	0.1438	CCDC78/FLNC/SPOCK1/CACNA2D1/FABP3	5
CC	GO:0030864	cortical actin cytoskeleton	5/423	80/19559	0.0296375	0.169489	0.1438	CDH2/ANLN/DLC1/CALB2/SLC2A1	5
CC	GO:1904724	tertiary granule lumen	4/423	55/19559	0.0309647	0.174355	0.147929	CTSH/GGH/OLFM4/PRSS3	4
CC	GO:1990023	mitotic spindle midzone	2/423	14/19559	0.0357636	0.198325	0.168266	CENPE/PRC1	2
CC	GO:0009897	external side of plasma membrane	15/423	417/19559	0.038592	0.210816	0.178863	CTSV/MS4A1/TF/FOLR1/BTNL9/SERPINE2/CA4/FGA/AQP4/SERPINA5/SCNN1B/ITGA6/CD1E/FGB/GPIHBP1	15
CC	GO:0005911	cell-cell junction	17/423	493/19559	0.0405884	0.215814	0.183104	CLDN2/CDH2/ECT2/ALOX15B/GJB3/CLDN8/CALB2/SLC2A1/PKP2/CDHR3/ABCC2/AQP3/TRIM29/GJB5/AQP7/GJB2/STEAP1	17
CC	GO:0042588	zymogen granule	2/423	15/19559	0.0406863	0.215814	0.183104	DMBT1/REG1A	2
CC	GO:0072562	blood microparticle	7/423	148/19559	0.0421785	0.220533	0.187107	TF/PRSS1/SLC2A1/C4BPA/FGA/FGB/CLU	7
CC	GO:0035580	specific granule lumen	4/423	62/19559	0.0451001	0.232488	0.19725	SLPI/GGH/RETN/OLFM4	4
MF	GO:0004866	endopeptidase inhibitor activity	19/411	183/18352	3.1183e-08	9.98071e-06	8.83217e-06	SLPI/CD109/SERPINB5/SERPIND1/CPAMD8/SPP2/SERPINE2/NGF/SPINK13/COL4A3/WFDC12/SERPINA4/SERPINB4/SERPINA5/SPOCK1/RARRES1/SERPINB3/PI3/BIRC5	19
MF	GO:0004867	serine-type endopeptidase inhibitor activity	14/411	98/18352	3.78041e-08	9.98071e-06	8.83217e-06	SLPI/CD109/SERPINB5/SERPIND1/CPAMD8/SERPINE2/SPINK13/WFDC12/SERPINA4/SERPINB4/SERPINA5/SPOCK1/SERPINB3/PI3	14
MF	GO:0030414	peptidase inhibitor activity	19/411	189/18352	5.25463e-08	9.98071e-06	8.83217e-06	SLPI/CD109/SERPINB5/SERPIND1/CPAMD8/SPP2/SERPINE2/NGF/SPINK13/COL4A3/WFDC12/SERPINA4/SERPINB4/SERPINA5/SPOCK1/RARRES1/SERPINB3/PI3/BIRC5	19
MF	GO:0061135	endopeptidase regulator activity	19/411	192/18352	6.76659e-08	9.98071e-06	8.83217e-06	SLPI/CD109/SERPINB5/SERPIND1/CPAMD8/SPP2/SERPINE2/NGF/SPINK13/COL4A3/WFDC12/SERPINA4/SERPINB4/SERPINA5/SPOCK1/RARRES1/SERPINB3/PI3/BIRC5	19
MF	GO:0008017	microtubule binding	22/411	265/18352	1.46506e-07	1.72877e-05	1.52983e-05	S100A9/KIF4A/KIF23/SKA1/FAM83D/TPPP/CFAP157/NEFH/KIF11/PLK1/SYBU/KIF1A/S100A8/CENPF/TPX2/KIF14/LRRK2/CENPE/DLGAP5/KIF2C/PRC1/BIRC5	22
MF	GO:0061134	peptidase regulator activity	20/411	229/18352	2.40375e-07	2.36369e-05	2.09168e-05	SLPI/CD109/SERPINB5/SERPIND1/CPAMD8/SPP2/SERPINE2/NGF/SPINK13/CTSH/COL4A3/WFDC12/SERPINA4/SERPINB4/SERPINA5/SPOCK1/RARRES1/SERPINB3/PI3/BIRC5	20
MF	GO:0015631	tubulin binding	25/411	365/18352	8.12937e-07	6.8519e-05	6.06341e-05	S100A9/KIF4A/KIF23/SKA1/FAM83D/PIFO/TPPP/CFAP157/NEFH/KIF11/PLK1/SYBU/KIF1A/S100A8/CENPF/C9orf24/TPX2/KIF14/LRRK2/CENPE/DLGAP5/KIF2C/PRC1/TPPP3/BIRC5	25
MF	GO:0050786	RAGE receptor binding	5/411	11/18352	2.27313e-06	0.000167643	0.000148352	S100A9/S100A8/S100P/S100A7/S100A12	5
MF	GO:0004857	enzyme inhibitor activity	23/411	383/18352	1.93724e-05	0.00117587	0.00104056	SLPI/CD109/SERPINB5/SERPIND1/CPAMD8/PKIB/SPP2/SERPINE2/NGF/SPINK13/COL4A3/WFDC12/SERPINA4/SERPINB4/SERPINA5/SPOCK1/RARRES1/SERPINB3/MYOZ1/PI3/LRRK2/BIRC5/SCGB1A1	23
MF	GO:0048306	calcium-dependent protein binding	10/411	85/18352	1.993e-05	0.00117587	0.00104056	S100A9/DMBT1/SNTN/S100A8/TNNC2/TNNC1/S100P/S100A7/S100A12/CPLX2	10
MF	GO:0008191	metalloendopeptidase inhibitor activity	4/411	16/18352	0.000364374	0.0195437	0.0172947	NGF/COL4A3/SPOCK1/RARRES1	4
MF	GO:0031406	carboxylic acid binding	13/411	212/18352	0.00102245	0.0502706	0.0444856	S100A9/PLOD2/FOLR1/CPS1/GCLC/HMMR/S100A8/PLA2G1B/SERPINA5/GLDC/AFP/AKR1C4/FABP3	13
MF	GO:0033293	monocarboxylic acid binding	7/411	72/18352	0.00113079	0.0513205	0.0454147	S100A9/S100A8/PLA2G1B/SERPINA5/AFP/AKR1C4/FABP3	7
MF	GO:0005201	extracellular matrix structural constituent	11/411	169/18352	0.00152347	0.0541907	0.0479547	MFAP5/LAMC2/MUC5AC/MFAP4/LAMA3/COL12A1/COL4A3/FGA/COL11A1/TGFBI/FGB	11
MF	GO:0008201	heparin binding	11/411	169/18352	0.00152347	0.0541907	0.0479547	CTSG/LAMC2/CEL/SERPIND1/SERPINE2/REG4/SERPINA5/COL11A1/ADAMTS8/CLEC3B/RSPO3	11
MF	GO:0048018	receptor ligand activity	22/411	487/18352	0.00153587	0.0541907	0.0479547	INSL4/SCG2/IL1A/VEGFC/GDF10/IL37/REG1A/SCGB3A1/VEGFD/CXCL5/NGF/STC2/PTHLH/RETN/FNDC5/ARTN/CGA/CSPG5/DKK1/TFF1/GREM1/STC1	22
MF	GO:0003777	microtubule motor activity	7/411	77/18352	0.0016782	0.0541907	0.0479547	KIF4A/KIF23/KIF11/KIF1A/KIF14/CENPE/KIF2C	7
MF	GO:0043177	organic acid binding	13/411	224/18352	0.00167989	0.0541907	0.0479547	S100A9/PLOD2/FOLR1/CPS1/GCLC/HMMR/S100A8/PLA2G1B/SERPINA5/GLDC/AFP/AKR1C4/FABP3	13
MF	GO:0030546	signaling receptor activator activity	22/411	492/18352	0.00174512	0.0541907	0.0479547	INSL4/SCG2/IL1A/VEGFC/GDF10/IL37/REG1A/SCGB3A1/VEGFD/CXCL5/NGF/STC2/PTHLH/RETN/FNDC5/ARTN/CGA/CSPG5/DKK1/TFF1/GREM1/STC1	22
MF	GO:0015250	water channel activity	3/411	12/18352	0.00211033	0.0622548	0.0550908	AQP4/AQP3/AQP7	3
MF	GO:0005539	glycosaminoglycan binding	13/411	232/18352	0.00228821	0.0642878	0.0568898	CTSG/LAMC2/CEL/SERPIND1/REG1A/SERPINE2/HMMR/REG4/SERPINA5/COL11A1/ADAMTS8/CLEC3B/RSPO3	13
MF	GO:0019894	kinesin binding	5/411	43/18352	0.0026282	0.0704835	0.0623725	FAM83D/PIFO/NEFH/SYBU/PRC1	5
MF	GO:0005172	vascular endothelial growth factor receptor binding	3/411	14/18352	0.00337736	0.0830267	0.0734723	VEGFC/VEGFD/GREM1	3
MF	GO:0005372	water transmembrane transporter activity	3/411	14/18352	0.00337736	0.0830267	0.0734723	AQP4/AQP3/AQP7	3
MF	GO:0046943	carboxylic acid transmembrane transporter activity	10/411	162/18352	0.00360465	0.0850698	0.0752803	SLC47A1/SLC16A11/SLC1A7/MFSD2A/SLC13A2/SLC7A10/ABCC2/SLC26A9/AKR1C4/SLC16A1	10
MF	GO:0005342	organic acid transmembrane transporter activity	10/411	163/18352	0.00376585	0.0854559	0.075622	SLC47A1/SLC16A11/SLC1A7/MFSD2A/SLC13A2/SLC7A10/ABCC2/SLC26A9/AKR1C4/SLC16A1	10
MF	GO:0004089	carbonate dehydratase activity	3/411	15/18352	0.00415215	0.0874917	0.0774236	CA4/CA3/CA9	3
MF	GO:0036041	long-chain fatty acid binding	3/411	15/18352	0.00415215	0.0874917	0.0774236	S100A9/S100A8/FABP3	3
MF	GO:0004252	serine-type endopeptidase activity	10/411	169/18352	0.00485673	0.0956609	0.0846527	CTSG/PCSK2/PRSS1/CTSH/TMPRSS11E/MST1L/PRSS2/PRSS3/KLK6/TPSD1	10
MF	GO:0008574	ATP-dependent microtubule motor activity, plus-end-directed	3/411	16/18352	0.00502625	0.0956609	0.0846527	KIF11/KIF1A/KIF14	3
MF	GO:0047498	calcium-dependent phospholipase A2 activity	3/411	16/18352	0.00502625	0.0956609	0.0846527	PLA2G10/PLA2G1B/PLA2G4F	3
MF	GO:0005324	long-chain fatty acid transporter activity	3/411	17/18352	0.006003	0.108524	0.0960358	MFSD2A/SLC2A1/FABP3	3
MF	GO:0004623	phospholipase A2 activity	4/411	33/18352	0.00607	0.108524	0.0960358	PLA2G10/PLA2G12B/PLA2G1B/PLA2G4F	4
MF	GO:0008514	organic anion transmembrane transporter activity	12/411	233/18352	0.00646679	0.112218	0.0993043	SLC47A1/SLC16A11/SLC1A7/MFSD2A/SLC13A2/SLC2A1/SLCO4A1/SLC7A10/ABCC2/SLC26A9/AKR1C4/SLC16A1	12
MF	GO:0050840	extracellular matrix binding	5/411	57/18352	0.0088654	0.149445	0.132248	DMBT1/LYPD3/COL11A1/ITGA6/TGFBI	5
MF	GO:0008236	serine-type peptidase activity	10/411	187/18352	0.00966198	0.155985	0.138035	CTSG/PCSK2/PRSS1/CTSH/TMPRSS11E/MST1L/PRSS2/PRSS3/KLK6/TPSD1	10
MF	GO:0004175	endopeptidase activity	18/411	440/18352	0.0106732	0.155985	0.138035	CTSG/PCSK2/CTSV/CPS1/PRSS1/PGC/ADAM12/CTSH/MMP10/TMPRSS11E/ADAMTS8/NAPSA/MST1L/MMP12/PRSS2/PRSS3/KLK6/TPSD1	18
MF	GO:0008083	growth factor activity	9/411	162/18352	0.0108987	0.155985	0.138035	VEGFC/GDF10/REG1A/VEGFD/NGF/ARTN/CSPG5/DKK1/TFF1	9
MF	GO:0005310	dicarboxylic acid transmembrane transporter activity	4/411	39/18352	0.0109865	0.155985	0.138035	SLC1A7/SLC13A2/ABCC2/SLC26A9	4
MF	GO:0005504	fatty acid binding	4/411	39/18352	0.0109865	0.155985	0.138035	S100A9/S100A8/AFP/FABP3	4
MF	GO:0005243	gap junction channel activity	3/411	21/18352	0.0109903	0.155985	0.138035	GJB3/GJB5/GJB2	3
MF	GO:0017171	serine hydrolase activity	10/411	191/18352	0.011104	0.155985	0.138035	CTSG/PCSK2/PRSS1/CTSH/TMPRSS11E/MST1L/PRSS2/PRSS3/KLK6/TPSD1	10
MF	GO:0003688	DNA replication origin binding	3/411	23/18352	0.0141604	0.189878	0.168027	ORC1/CDC6/MCM10	3
MF	GO:0070840	dynein complex binding	3/411	23/18352	0.0141604	0.189878	0.168027	NEFH/CFAP73/CENPF	3
MF	GO:0008509	anion transmembrane transporter activity	15/411	357/18352	0.0151132	0.197769	0.175011	SLC47A1/SLC16A11/SLC1A7/CLIC3/MFSD2A/SLC13A2/CLIC5/SLC2A1/SLCO4A1/ADAMTS8/SLC7A10/ABCC2/SLC26A9/AKR1C4/SLC16A1	15
MF	GO:1901681	sulfur compound binding	12/411	262/18352	0.0154193	0.197769	0.175011	CTSG/FST/LAMC2/CEL/SERPIND1/SERPINE2/REG4/SERPINA5/COL11A1/ADAMTS8/CLEC3B/RSPO3	12
MF	GO:0005245	voltage-gated calcium channel activity	4/411	44/18352	0.0166222	0.208662	0.18465	CACNA2D2/CACNB1/CACNA2D1/TSPOAP1	4
MF	GO:0017075	syntaxin-1 binding	3/411	26/18352	0.0197899	0.210625	0.186387	SYBU/LRRK2/CPLX2	3
MF	GO:0102567	phospholipase A2 activity (consuming 1,2-dipalmitoylphosphatidylcholine)	3/411	26/18352	0.0197899	0.210625	0.186387	PLA2G10/PLA2G1B/PLA2G4F	3
MF	GO:0102568	phospholipase A2 activity consuming 1,2-dioleoylphosphatidylethanolamine)	3/411	26/18352	0.0197899	0.210625	0.186387	PLA2G10/PLA2G1B/PLA2G4F	3
MF	GO:0016595	glutamate binding	2/411	10/18352	0.0199904	0.210625	0.186387	CPS1/GCLC	2
MF	GO:0018455	alcohol dehydrogenase [NAD(P)+] activity	2/411	10/18352	0.0199904	0.210625	0.186387	ADHFE1/ADH1B	2
MF	GO:0032052	bile acid binding	2/411	10/18352	0.0199904	0.210625	0.186387	PLA2G1B/AKR1C4	2
MF	GO:0045294	alpha-catenin binding	2/411	10/18352	0.0199904	0.210625	0.186387	CDH2/PKP2	2
MF	GO:0071723	lipopeptide binding	2/411	10/18352	0.0199904	0.210625	0.186387	LBP/CD1E	2
MF	GO:0005179	hormone activity	7/411	122/18352	0.0199915	0.210625	0.186387	INSL4/STC2/PTHLH/RETN/FNDC5/CGA/STC1	7
MF	GO:0005506	iron ion binding	8/411	151/18352	0.0205755	0.212974	0.188466	MELTF/CYP24A1/CYP4F3/PLOD2/TF/ALOX15B/CYP4B1/RRM2	8
MF	GO:0042910	xenobiotic transmembrane transporter activity	3/411	27/18352	0.021902	0.222302	0.196721	SLC47A1/SLC2A1/ABCC2	3
MF	GO:1901618	organic hydroxy compound transmembrane transporter activity	4/411	48/18352	0.0222302	0.222302	0.196721	AQP3/AQP7/AKR1C4/SLC16A1	4
MF	GO:0008199	ferric iron binding	2/411	11/18352	0.0240751	0.231972	0.205277	TF/RRM2	2
MF	GO:0015166	polyol transmembrane transporter activity	2/411	11/18352	0.0240751	0.231972	0.205277	AQP3/AQP7	2
MF	GO:0016835	carbon-oxygen lyase activity	5/411	74/18352	0.0251227	0.231972	0.205277	NEIL3/CA4/CA3/CA9/HMGA2	5
MF	GO:0070888	E-box binding	4/411	50/18352	0.0254173	0.231972	0.205277	TCF21/SNAI2/ATOH8/ARNTL2	4
MF	GO:0004693	cyclin-dependent protein serine/threonine kinase activity	3/411	29/18352	0.0264808	0.231972	0.205277	CDKL2/CDK6/CDK1	3
MF	GO:0097472	cyclin-dependent protein kinase activity	3/411	29/18352	0.0264808	0.231972	0.205277	CDKL2/CDK6/CDK1	3
MF	GO:0042887	amide transmembrane transporter activity	4/411	51/18352	0.0271086	0.231972	0.205277	SLC47A1/SLC15A1/AQP3/AQP7	4
MF	GO:0004032	alditol:NADP+ 1-oxidoreductase activity	2/411	12/18352	0.0284681	0.231972	0.205277	AKR1C4/AKR1B10	2
MF	GO:0008353	RNA polymerase II CTD heptapeptide repeat kinase activity	2/411	12/18352	0.0284681	0.231972	0.205277	CDK6/CDK1	2
MF	GO:0035325	Toll-like receptor binding	2/411	12/18352	0.0284681	0.231972	0.205277	S100A9/S100A8	2
MF	GO:0043176	amine binding	2/411	12/18352	0.0284681	0.231972	0.205277	HTR3A/HTR1D	2
MF	GO:0051378	serotonin binding	2/411	12/18352	0.0284681	0.231972	0.205277	HTR3A/HTR1D	2
MF	GO:0099186	structural constituent of postsynapse	2/411	12/18352	0.0284681	0.231972	0.205277	INA/NEFH	2
MF	GO:0022829	wide pore channel activity	3/411	30/18352	0.028947	0.231972	0.205277	GJB3/GJB5/GJB2	3
MF	GO:0003774	motor activity	7/411	132/18352	0.0291862	0.231972	0.205277	KIF4A/KIF23/KIF11/KIF1A/KIF14/CENPE/KIF2C	7
MF	GO:0005200	structural constituent of cytoskeleton	6/411	104/18352	0.0294879	0.231972	0.205277	INA/KRT6A/KRT16/NEFH/KRT6B/TUBA4B	6
MF	GO:0005319	lipid transporter activity	7/411	134/18352	0.0313182	0.243128	0.21515	MFSD2A/SLC2A1/GRAMD1B/SFTPA1/ABCA3/AKR1C4/FABP3	7
MF	GO:0003906	DNA-(apurinic or apyrimidinic site) endonuclease activity	2/411	13/18352	0.0331535	0.247602	0.219109	NEIL3/HMGA2	2
MF	GO:0031994	insulin-like growth factor I binding	2/411	13/18352	0.0331535	0.247602	0.219109	IGFBP1/ITGA6	2
MF	GO:0039706	co-receptor binding	2/411	13/18352	0.0331535	0.247602	0.219109	DKK1/LRRK2	2
MF	GO:0048019	receptor antagonist activity	3/411	32/18352	0.0342308	0.252452	0.223401	FST/DKK1/AGTR2	3
MF	GO:0030280	structural constituent of skin epidermis	2/411	14/18352	0.0381162	0.277493	0.24556	SPRR1A/PI3	2
MF	GO:0030246	carbohydrate binding	11/411	267/18352	0.0387721	0.277493	0.24556	PLOD2/REG1A/REG4/CD207/LOXL2/SFTPD/SFTPA1/NPTX2/CLEC3B/SFTPA2/ITLN2	11
MF	GO:0070851	growth factor receptor binding	7/411	141/18352	0.0395949	0.277493	0.24556	IL1A/VEGFC/IL37/MS4A1/VEGFD/ARTN/GREM1	7
MF	GO:0000217	DNA secondary structure binding	3/411	34/18352	0.0399778	0.277493	0.24556	NEIL3/CLSPN/HMGA2	3
MF	GO:1990939	ATP-dependent microtubule motor activity	3/411	34/18352	0.0399778	0.277493	0.24556	KIF11/KIF1A/KIF14	3
MF	GO:0015291	secondary active transmembrane transporter activity	10/411	236/18352	0.0404611	0.277582	0.245639	SLC47A1/SLC16A11/SLC1A7/MFSD2A/SLC15A1/SLC13A2/SLC46A2/SLCO4A1/SLC26A9/SLC16A1	10
MF	GO:0015293	symporter activity	7/411	143/18352	0.0421985	0.281005	0.248668	SLC16A11/SLC1A7/MFSD2A/SLC15A1/SLC13A2/SLC46A2/SLC16A1	7
MF	GO:0015267	channel activity	17/411	479/18352	0.0424392	0.281005	0.248668	HTR3A/CLIC3/CACNA2D2/GJB3/CACNB1/CLIC5/AQP4/CACNA2D1/SCNN1B/KCNK17/AQP3/SLC26A9/TSPOAP1/GJB5/AQP7/GJB2/STEAP1	17
MF	GO:0008028	monocarboxylic acid transmembrane transporter activity	4/411	59/18352	0.0430284	0.281005	0.248668	SLC16A11/MFSD2A/AKR1C4/SLC16A1	4
MF	GO:0022803	passive transmembrane transporter activity	17/411	480/18352	0.0431316	0.281005	0.248668	HTR3A/CLIC3/CACNA2D2/GJB3/CACNB1/CLIC5/AQP4/CACNA2D1/SCNN1B/KCNK17/AQP3/SLC26A9/TSPOAP1/GJB5/AQP7/GJB2/STEAP1	17
MF	GO:0070492	oligosaccharide binding	2/411	15/18352	0.0433414	0.281005	0.248668	REG1A/LOXL2	2
MF	GO:0005149	interleukin-1 receptor binding	2/411	16/18352	0.048815	0.31037	0.274654	IL1A/IL37	2
MF	GO:0015144	carbohydrate transmembrane transporter activity	3/411	37/18352	0.0494488	0.31037	0.274654	SLC2A1/AQP3/AQP7	3
MF	GO:0042056	chemoattractant activity	3/411	37/18352	0.0494488	0.31037	0.274654	SCG2/VEGFC/VEGFD	3
